# Supplementary material for: Mechanistic insights into dioxygen activation by a manganese corrole complex: a broken-symmetry DFT study
Source: Royal Society of Chemistry journal article supplement (doi:10.1039/d1ra02722k), 2021-01-01
Supplement: d1ra02722k1.pdf [file d1ra02722k1.pdf]

## Supplementary Information

# Mechanistic Insights into Dioxygen Activation by a Manganese Corrole Complex: A Broken-Symmetry DFT Study

Jiangfeng Yu, Wenzhen Lai\*

Department of Chemistry, Renmin University of China, Beijing, 100872, China.

### Table of Contents

|                                                                                       |     |
|---------------------------------------------------------------------------------------|-----|
| Part I. Dioxygen Binding of Mn(III) Corrole Complex.....                              | S2  |
| A. Without the axial OH <sup>-</sup> ligand. ....                                     | S2  |
| B. With the axial OH <sup>-</sup> ligand. ....                                        | S5  |
| C. Binding energy of dioxygen to the Mn(III) corrole complexes.....                   | S8  |
| Part II. Reaction of [(TPFC)Mn(OH)(O <sub>2</sub> ) <sup>-</sup> with THF .....       | S9  |
| Part III. Mn(V)-Oxo Complexes with and without the Axial OH <sup>-</sup> Ligand. .... | S13 |
| Part IV. Bond Dissociation Free Energies and Reaction Energies .....                  | S14 |
| Part V. Cartesian Coordinates for all the Species .....                               | S15 |

## Part I. Dioxygen Binding of Mn(III) Corrole Complex

### A. Without the axial OH<sup>-</sup> ligand.

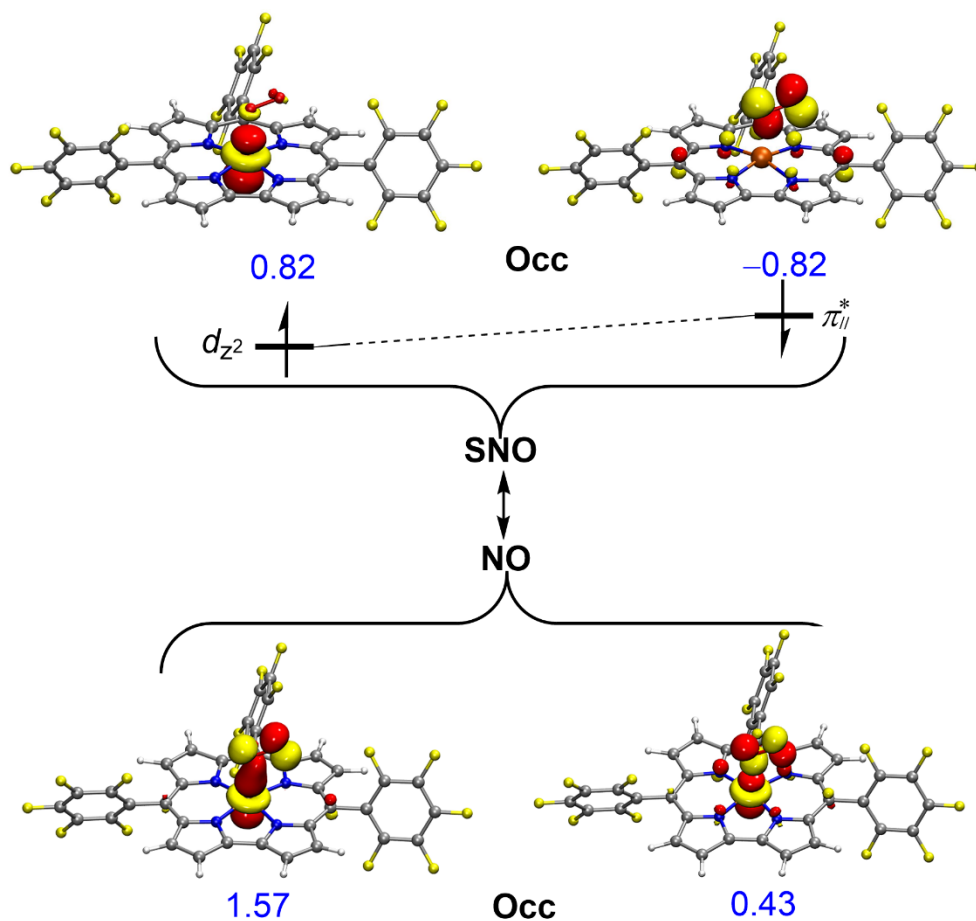

**Fig. S1** Spin natural orbitals (SNO) and natural orbitals (NO) responsible for Mn-O<sub>2</sub> bonding in the quintet [(TPFC)MnO<sub>2</sub>].

**Table S1.** The calculated expectation values of  $\langle S^2 \rangle$  and absolute energies (in Hartree) of [(TPFC)Mn<sup>III</sup>(O<sub>2</sub>)].

| species                                   | septet       | quintet      | triplet      | singlet      |
|-------------------------------------------|--------------|--------------|--------------|--------------|
| $\langle S^2 \rangle$                     | 12.0321      | 6.2610       | 2.9167       | 0.0000       |
| <i>E</i> (BP86/def2-SVP)                  | -4430.361923 | -4430.364162 | -4430.377081 | -4430.368495 |
| <i>E</i> (BP86/def2-TZVP)                 | -4434.246159 | -4434.247586 | -4434.260499 | -4434.252117 |
| <i>E</i> (DKH2-BP86)                      | -4443.935531 | -4443.937640 | -4443.951203 | -4443.943754 |
| ZPE(BP86/def2-SVP)                        | 0.368264     | 0.368769     | 0.369449     | 0.371922     |
| <i>H</i> <sub>corr</sub> (BP86/def2-SVP)  | 0.419712     | 0.419446     | 0.419752     | 0.421593     |
| <i>G</i> <sub>corr</sub> (BP86/def2-SVP)  | 0.276546     | 0.280156     | 0.282995     | 0.286134     |
| <i>E</i> <sub>disp</sub>                  | -0.102346    | -0.106632    | -0.107075    | -0.105842    |
| <i>H</i> (BP86-D3)                        | -4443.618165 | -4443.624826 | -4443.638526 | -4443.628003 |
| <i>G</i> (BP86-D3)                        | -4443.761331 | -4443.764116 | -4443.775283 | -4443.763462 |
| $\langle S^2 \rangle$                     | 12.0405      | 6.7087       | 3.8380       | 1.8628       |
| <i>E</i> (TPSSh/def2-SVP)                 | -4430.264358 | -4430.252049 | -4430.262526 | -4430.232936 |
| <i>E</i> (TPSSh/def2-TZVP)                | -4434.134052 | -4434.120315 | -4434.129832 | -4434.101082 |
| <i>E</i> (DKH2-TPSSh)                     | -4443.729611 | -4443.716184 | -4443.725558 | -4443.696404 |
| ZPE(TPSSh/def2-SVP)                       | 0.378790     | 0.378790     | 0.378653     | 0.378754     |
| <i>H</i> <sub>corr</sub> (TPSSh/def2-SVP) | 0.429113     | 0.428552     | 0.427841     | 0.427984     |
| <i>G</i> <sub>corr</sub> (TPSSh/def2-SVP) | 0.288883     | 0.291635     | 0.292830     | 0.294830     |
| <i>E</i> <sub>disp</sub>                  | -0.075989    | -0.078089    | -0.078002    | -0.078369    |
| <i>H</i> (TPSSh-D3)                       | -4443.376487 | -4443.390834 | -4443.400093 | -4443.372746 |
| <i>G</i> (TPSSh-D3)                       | -4443.516717 | -4443.502638 | -4443.510730 | -4443.479943 |
| $\langle S^2 \rangle$                     | 12.0449      | 6.9403       | 4.0196       | 2.0606       |
| <i>E</i> (B3LYP/def2-SVP)                 | -4430.137344 | -4430.119108 | -4430.134498 | -4430.098642 |
| <i>E</i> (B3LYP/def2-TZVP)                | -4434.051191 | -4434.030792 | -4434.046916 | -4434.009346 |
| <i>E</i> (DKH2-B3LYP)                     | -4443.699161 | -4443.678732 | -4443.694825 | -4443.656578 |
| ZPE(B3LYP/def2-SVP)                       | 0.380858     | 0.380409     | 0.380663     | 0.380278     |
| <i>H</i> <sub>corr</sub> (B3LYP/def2-SVP) | 0.430593     | 0.430103     | 0.430569     | 0.429156     |
| <i>G</i> <sub>corr</sub> (B3LYP/def2-SVP) | 0.292118     | 0.291625     | 0.291370     | 0.296505     |
| <i>E</i> <sub>disp</sub>                  | -0.092164    | -0.094218    | -0.093353    | -0.094513    |
| <i>H</i> (B3LYP-D3)                       | -4443.360732 | -4443.342847 | -4443.357609 | -4443.321935 |
| <i>G</i> (B3LYP-D3)                       | -4443.499207 | -4443.481325 | -4443.496808 | -4433.454586 |

**Table S2.** Calculated relative energies (kcal mol<sup>-1</sup>) of different spin states of [(TPFC)Mn<sup>III</sup>(O<sub>2</sub>)].

| species                                   | septet | quintet | triplet | singlet |
|-------------------------------------------|--------|---------|---------|---------|
| $\Delta E(\text{BP86}/\text{def2-SVP})$   | 0.0    | -1.4    | -9.5    | -4.1    |
| $\Delta E(\text{BP86}/\text{def2-TZVP})$  | 0.0    | -0.9    | -9.0    | -3.7    |
| $\Delta H(\text{BP86-D3})$                | 0.0    | -4.2    | -12.8   | -6.2    |
| $\Delta G(\text{BP86-D3})$                | 0.0    | -1.7    | -8.8    | -1.3    |
| $\Delta E(\text{TPSSh}/\text{def2-SVP})$  | 0.0    | 7.7     | 1.2     | 19.7    |
| $\Delta E(\text{TPSSh}/\text{def2-TZVP})$ | 0.0    | 8.6     | 2.7     | 20.7    |
| $\Delta H(\text{TPSSh-D3})$               | 0.0    | 2.2     | -3.6    | 13.6    |
| $\Delta G(\text{TPSSh-D3})$               | 0.0    | 4.3     | -0.3    | 18.0    |
| $\Delta E(\text{B3LYP}/\text{def2-SVP})$  | 0.0    | 11.4    | 1.8     | 24.3    |
| $\Delta E(\text{B3LYP}/\text{def2-TZVP})$ | 0.0    | 12.8    | 2.7     | 26.3    |
| $\Delta H(\text{B3LYP-D3})$               | 0.0    | 6.8     | 0.5     | 18.6    |
| $\Delta G(\text{B3LYP-D3})$               | 0.0    | 8.8     | 3.8     | 23.1    |

**Table S3.** Mulliken spin density of [(TPFC)Mn<sup>III</sup>(O<sub>2</sub>)].

| species | B3LYP |       |       |         | TPSSh |       |       |         | BP86 |       |       |         |
|---------|-------|-------|-------|---------|-------|-------|-------|---------|------|-------|-------|---------|
|         | Mn    | O1    | O2    | Corrole | Mn    | O1    | O2    | Corrole | Mn   | O1    | O2    | Corrole |
| septet  | 4.01  | 0.99  | 1.00  | 0.00    | 4.00  | 1.00  | 1.00  | 0.00    | 4.01 | 0.99  | 1.00  | 0.00    |
| quintet | 3.95  | 0.07  | 0.09  | -0.10   | 3.79  | 0.15  | 0.27  | -0.20   | 3.29 | 0.27  | 0.43  | 0.01    |
| triplet | 4.00  | -0.96 | -1.01 | -0.03   | 3.87  | -0.83 | -0.97 | -0.07   | 3.09 | -0.45 | -0.68 | 0.04    |
| singlet | 2.24  | -0.54 | -0.73 | -0.96   | 2.05  | -0.46 | -0.67 | -0.92   | 0.00 | 0.00  | 0.00  | 0.00    |

## B. with the axial OH<sup>-</sup> ligand.

**Table S4.** The calculated expectation values of  $\langle S^2 \rangle$  and absolute energies (in Hartree) of [(TPFC)Mn<sup>III</sup>(O<sub>2</sub>)(OH)]<sup>-</sup>.

| species                                   | septet       | quintet      | triplet                          | singlet            |              |
|-------------------------------------------|--------------|--------------|----------------------------------|--------------------|--------------|
| $\langle S^2 \rangle$                     | 12.0317      | 6.0302       | 2.9232                           | 2.0246             |              |
| <i>E</i> (BP86/def2-SVP)                  | -4506.265554 | -4506.284522 | -4506.290010                     | -4506.277316       |              |
| <i>E</i> (BP86/def2-TZVP)                 | -4510.252334 | -4510.267136 | -4510.273419                     | -4510.255656       |              |
| <i>E</i> (DKH2-BP86)                      | -4519.995485 | -4520.012624 | -4520.019129                     | -4520.001447       |              |
| ZPE(BP86/def2-SVP)                        | 0.378839     | 0.38098      | 0.381112                         | 0.381832           |              |
| <i>H</i> <sub>corr</sub> (BP86/def2-SVP)  | 0.433050     | 0.433556     | 0.433552                         | 0.433786           |              |
| <i>G</i> <sub>corr</sub> (BP86/def2-SVP)  | 0.283059     | 0.291233     | 0.292448                         | 0.295284           |              |
| <i>E</i> <sub>disp</sub>                  | -0.111538    | -0.112978    | -0.113161                        | -0.113586          |              |
| <i>H</i> (BP86-D3)                        | -4519.673973 | -4519.692046 | -4519.698738                     | -4519.681247       |              |
| <i>G</i> (BP86-D3)                        | -4519.823964 | -4519.834369 | -4519.839842                     | -4519.819749       |              |
| $\langle S^2 \rangle$                     | 12.0776      | 6.1167       | 4.0354                           | 2.0291             |              |
| <i>E</i> (B3LYP/def2-SVP)                 | -4506.032813 | -4506.022166 | -4506.032824                     | -4506.022336       |              |
| <i>E</i> (B3LYP/def2-TZVP)                | -4510.051641 | -4510.038505 | -4510.051796                     | -4510.034680       |              |
| <i>E</i> (DKH2-B3LYP)                     | -4519.752607 | -4519.743077 | -4519.752743                     | -4519.736052       |              |
| ZPE(B3LYP/def2-SVP)                       | 0.391695     | 0.393882     | 0.391697                         | 0.393152           |              |
| <i>H</i> <sub>corr</sub> (B3LYP/def2-SVP) | 0.444413     | 0.444727     | 0.444425                         | 0.445193           |              |
| <i>G</i> <sub>corr</sub> (B3LYP/def2-SVP) | 0.297531     | 0.306421     | 0.297360                         | 0.302878           |              |
| <i>E</i> <sub>disp</sub>                  | -0.098108    | -0.099729    | -0.098093                        | -0.099527          |              |
| <i>H</i> (B3LYP-D3)                       | -4519.406302 | -4519.398079 | -4519.406411                     | -4519.390386       |              |
| <i>G</i> (B3LYP-D3)                       | -4519.553184 | -4519.536385 | -4519.553476                     | -4519.532701       |              |
| species                                   | septet       | quintet      | O <sub>2</sub> -bound<br>triplet | unbound<br>triplet | singlet      |
| $\langle S^2 \rangle$                     | 12.0376      | 6.0803       | 3.0788                           | 3.9978             | 1.1658       |
| <i>E</i> (TPSSh/def2-SVP)                 | -4506.156324 | -4506.160884 | -4506.165697                     | -4506.156644       | -4506.151603 |
| <i>E</i> (TPSSh/def2-TZVP)                | -4510.127725 | -4510.129186 | -4510.133697                     | -4510.127603       | -4510.107167 |
| <i>E</i> (DKH2-TPSSh)                     | -4519.806638 | -4519.811321 | -4519.815774                     | -4519.806640       | -4519.794813 |
| ZPE(TPSSh/def2-SVP)                       | 0.389669     | 0.391831     | 0.391775                         | 0.389722           | 0.391006     |
| <i>H</i> <sub>corr</sub> (TPSSh/def2-SVP) | 0.442835     | 0.443170     | 0.443108                         | 0.442734           | 0.443423     |
| <i>G</i> <sub>corr</sub> (TPSSh/def2-SVP) | 0.295091     | 0.303852     | 0.304475                         | 0.297118           | 0.300777     |
| <i>E</i> <sub>disp</sub>                  | -0.080753    | -0.082806    | -0.082822                        | -0.081523          | -0.083424    |
| <i>H</i> (TPSSh-D3)                       | -4519.444556 | -4519.450957 | -4519.455488                     | -4519.445429       | -4519.434814 |
| <i>G</i> (TPSSh-D3)                       | -4519.592300 | -4519.590275 | -4519.594121                     | -4519.591045       | -4519.577460 |

**Table S5.** Relative energies (kcal mol<sup>-1</sup>) of [(TPFC)Mn<sup>III</sup>(O<sub>2</sub>)(OH)]<sup>-</sup>.

| species                                   | septet | quintet | triplet | singlet |
|-------------------------------------------|--------|---------|---------|---------|
| $\Delta E(\text{BP86}/\text{def2-SVP})$   | 15.4   | 3.4     | 0.0     | 8.0     |
| $\Delta E(\text{BP86}/\text{def2-TZVP})$  | 13.2   | 3.9     | 0.0     | 11.2    |
| $\Delta(E+\text{ZPE})(\text{BP86})$       | 11.8   | 3.9     | 0.0     | 11.6    |
| $\Delta H(\text{BP86-D3})$                | 15.5   | 4.2     | 0.0     | 11.0    |
| $\Delta G(\text{BP86-D3})$                | 10.0   | 3.4     | 0.0     | 12.6    |
| $\Delta E(\text{B3LYP}/\text{def2-SVP})$  | 0.0    | 6.7     | 0.0     | 6.6     |
| $\Delta E(\text{B3LYP}/\text{def2-TZVP})$ | 0.1    | 8.3     | 0.0     | 10.7    |
| $\Delta(E+\text{ZPE})(\text{B3LYP})$      | 0.1    | 9.7     | 0.0     | 11.7    |
| $\Delta H(\text{B3LYP-D3})$               | 0.1    | 5.2     | 0.0     | 10.1    |
| $\Delta G(\text{B3LYP-D3})$               | 0.2    | 10.7    | 0.0     | 13.0    |

  

| species                                   | septet | quintet | O <sub>2</sub> -bound triplet | unbound triplet | singlet |
|-------------------------------------------|--------|---------|-------------------------------|-----------------|---------|
| $\Delta E(\text{TPSSh}/\text{def2-SVP})$  | 5.9    | 3.0     | 0.0                           | 5.7             | 8.9     |
| $\Delta E(\text{TPSSh}/\text{def2-TZVP})$ | 3.9    | 2.8     | 0.0                           | 3.8             | 16.6    |
| $\Delta(E+\text{ZPE})(\text{TPSSh})$      | 2.4    | 2.8     | 0.0                           | 2.5             | 16.1    |
| $\Delta H(\text{TPSSh-D3})$               | 6.9    | 2.8     | 0.0                           | 6.3             | 13.0    |
| $\Delta G(\text{TPSSh-D3})$               | 1.1    | 2.4     | 0.0                           | 1.9             | 10.5    |

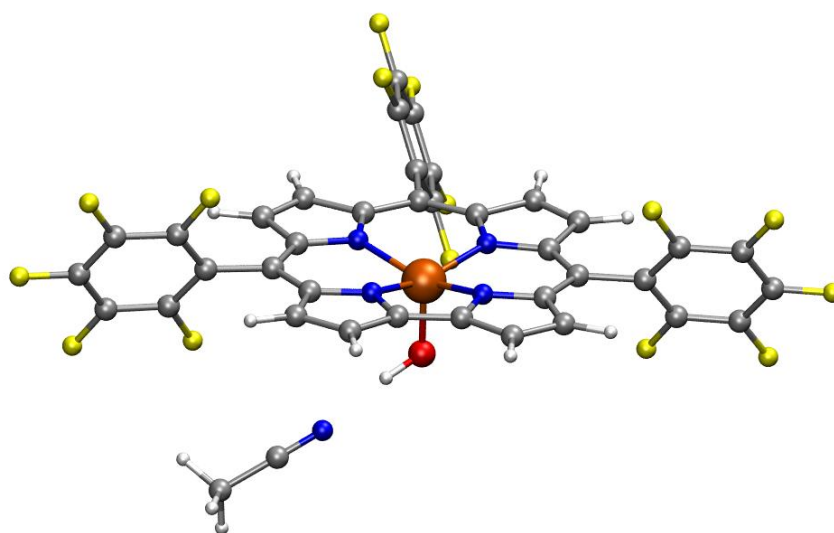**Fig. S2** The TPSSh-optimized structure of [(TPFC)Mn(OH)(CH<sub>3</sub>CN)]<sup>-</sup>.

**Table S6.** Mulliken spin density of [(TPFC)Mn<sup>III</sup>(O<sub>2</sub>)(OH)]<sup>-</sup>.

| species                       | B3LYP |       |       |      |         |
|-------------------------------|-------|-------|-------|------|---------|
|                               | Mn    | O1    | O2    | O(H) | Corrole |
| septet                        | 4.01  | 0.99  | 1.00  | 0.19 | 0.00    |
| quintet                       | 3.17  | 0.29  | 0.53  | 0.08 | -0.10   |
| triplet                       | 4.00  | -0.96 | -1.01 | 0.19 | -0.03   |
| singlet                       | 2.24  | -0.54 | -0.73 | 0.05 | -0.96   |
| species                       | TPSSh |       |       |      |         |
|                               | Mn    | O1    | O2    | O(H) | Corrole |
| septet                        | 3.81  | 1.00  | 1.00  | 0.20 | 0.00    |
| quintet                       | 3.08  | 0.30  | 0.54  | 0.10 | -0.03   |
| O <sub>2</sub> -bound triplet | 3.13  | -0.52 | -0.67 | 0.11 | -0.05   |
| unbound triplet               | 3.79  | -0.99 | -0.98 | 0.20 | -0.02   |
| singlet                       | 1.95  | -0.97 | -0.98 | 0.07 | -0.07   |
| species                       | BP86  |       |       |      |         |
|                               | Mn    | O1    | O2    | O(H) | Corrole |
| septet                        | 3.68  | 0.97  | 0.97  | 0.25 | 0.13    |
| quintet                       | 2.71  | 0.46  | 0.64  | 0.14 | 0.06    |
| triplet                       | 2.89  | -0.45 | -0.60 | 0.15 | 0.02    |
| singlet                       | 1.12  | -0.47 | -0.63 | 0.04 | -0.06   |

### C. Binding energy of dioxygen to the Mn(III) corrole complexes.

**Table S7.** Absolute energies (in Hartree) for the key species of O<sub>2</sub> binding.

| species                                    | Mn <sup>III</sup> (quintet) | O <sub>2</sub> (triplet) | Mn <sup>III</sup> -OH |
|--------------------------------------------|-----------------------------|--------------------------|-----------------------|
| <i>E</i> (BP86/def2-SVP)                   | -4280.144966                | -150.2161514             | -4356.048247          |
| <i>E</i> (BP86/def2-TZVP)                  | -4283.848011                | -150.3992109             | -4359.853734          |
| <i>E</i> (DKH2-BP86)                       | -4293.428953                | -150.497184              | -4369.483063          |
| ZPE(BP86/def2-SVP)                         | 0.364051                    | 0.003632                 | 0.375030              |
| <i>H</i> <sub>corr</sub> (BP86/def2-SVP)   | 0.411381                    | 0.006940                 | 0.424895              |
| <i>G</i> <sub>corr</sub> (BP86/def2-SVP)   | 0.280821                    | -0.016350                | 0.289084              |
| <i>E</i> <sub>disp</sub>                   | -0.09881996                 | -0.00000114              | -0.10539793           |
| <i>H</i> (BP86-D3)                         | -4293.116392                | -150.490245              | -4369.163566          |
| <i>G</i> (BP86-D3)                         | -4293.246952                | -150.513535              | -4369.299377          |
| <i>E</i> (TPSSh/def2-SVP)                  | -4280.054474                | -150.2077112             | -4355.94636           |
| <i>E</i> (TPSSh/def2-TZVP)                 | -4283.742782                | -150.3909299             | -4359.736002          |
| <i>E</i> (DKH2-TPSSh)                      | -4293.232878                | -150.4964784             | -4369.309891          |
| ZPE(TPSSh/def2-SVP)                        | 0.374276                    | 0.003812                 | 0.385399              |
| <i>H</i> <sub>corr</sub> (TPSSh/def2-SVP)  | 0.420547                    | 0.007119                 | 0.434300              |
| <i>G</i> <sub>corr</sub> (TPSSh/def2-SVP)  | 0.292365                    | -0.016149                | 0.300317              |
| <i>E</i> <sub>disp</sub>                   | -0.0720935                  | -0.00000072              | -0.07700999           |
| <i>H</i> (TPSSh-D3)                        | -4292.903053                | -150.486770              | -4368.952601          |
| <i>G</i> (TPSSh-D3)                        | -4293.031235                | -150.510038              | -4369.086584          |
| <i>E</i> (B3LYP/def2-SVP)                  | -4279.930220                | -150.2049982             | -4355.825639          |
| <i>E</i> (B3LYP/def2-TZVP)                 | -4283.661573                | -150.3898699             | -4359.661795          |
| <i>E</i> (DKH2-B3LYP)                      | -4293.202163                | -150.4973652             | -4369.249955          |
| ZPE(B3LYP/def2-SVP)                        | 0.376170                    | 0.003869                 | 0.387318              |
| <i>H</i> <sub>corr</sub> (B3LYP /def2-SVP) | 0.421939                    | 0.007176                 | 0.435829              |
| <i>G</i> <sub>corr</sub> (B3LYP/def2-SVP)  | 0.294835                    | -0.016086                | 0.302071              |
| <i>E</i> <sub>disp</sub>                   | -0.08750655                 | -0.00000096              | -0.09311206           |
| <i>H</i> (B3LYP-D3)                        | -4292.867731                | -150.490190              | -4368.907238          |
| <i>G</i> (B3LYP-D3)                        | -4292.994835                | -150.513452              | -4369.040996          |



Part II. Reaction of  $[(\text{TPFC})\text{Mn}(\text{OH})(\text{O}_2)]^-$  with THF

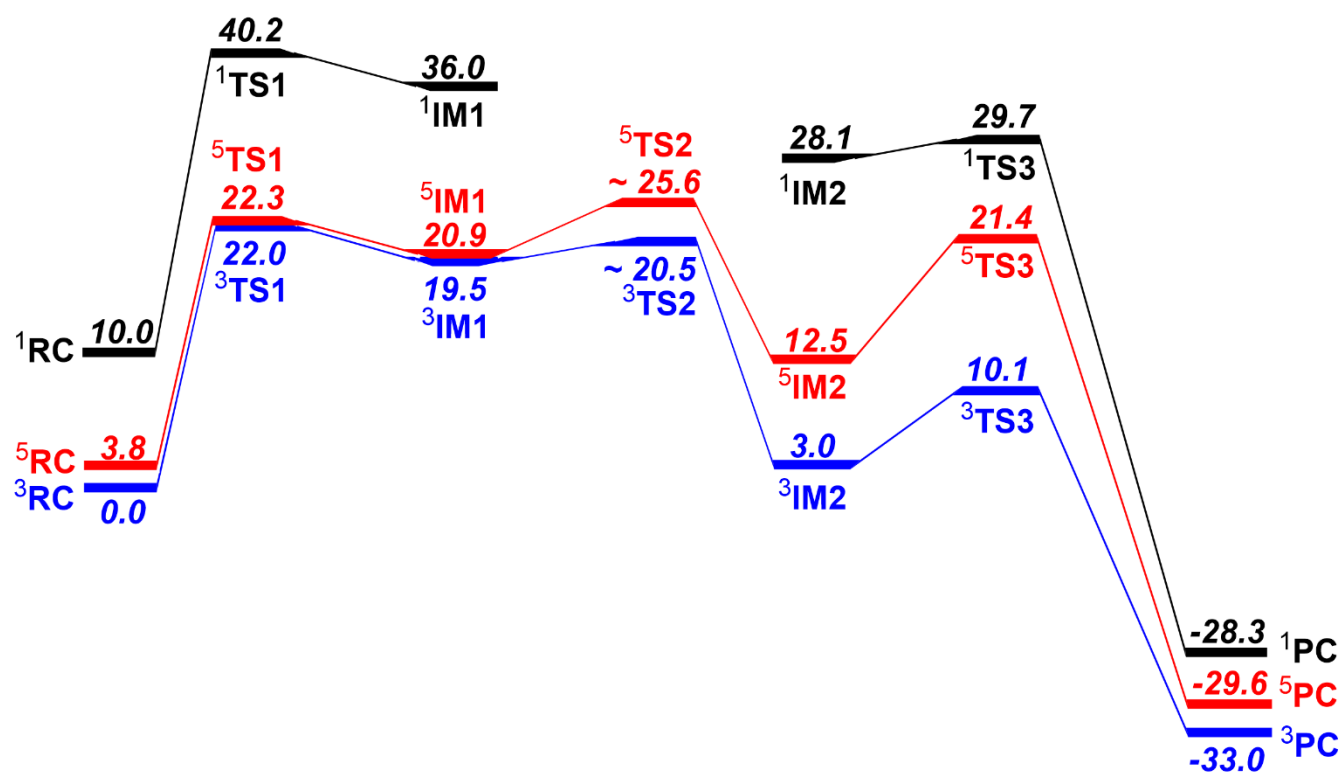

**Fig. S3.** Energy profile for the reaction of  $[(\text{TPFC})\text{Mn}(\text{OH})(\text{O}_2)]^-$  with THF. Relative free energies (kcal mol<sup>-1</sup>) were given at the TPSSh-D3 level.

**Table S8.** Absolute energies (in Hartree) of the key species involved in the reaction of [(TPFC)Mn(OH)(O<sub>2</sub>)]<sup>-</sup> with THF at the TPSSh level.

| species          | $\langle S^2 \rangle$ | $E(\text{def2-SVP})$ | $E(\text{def2-TZVP})$ | $E(\text{DKH})$ | $E_{\text{corr}}$ | $E_{\text{disp}}$ | $G$          |
|------------------|-----------------------|----------------------|-----------------------|-----------------|-------------------|-------------------|--------------|
| <sup>3</sup> RC  | 3.0653                | -4738.471296         | -4742.690887          | -4752.485863    | 0.409097          | -0.096424         | -4752.173189 |
| <sup>3</sup> TS1 | 2.9923                | -4738.432267         | -4742.652374          | -4752.446463    | 0.408713          | -0.100453         | -4752.138203 |
| <sup>3</sup> IM1 | 3.0412                | -4738.436935         | -4742.658652          | -4752.452911    | 0.410763          | -0.099899         | -4752.142047 |
| <sup>3</sup> IM2 | 2.0148                | -4738.477273         | -4742.691502          | -4752.487302    | 0.419097          | -0.100170         | -4752.168375 |
| <sup>3</sup> TS3 | 2.0469                | -4738.459030         | -4742.673709          | -4752.473531    | 0.416698          | -0.100218         | -4752.157051 |
| <sup>3</sup> PC  | 2.7694                | -4738.527174         | -4742.749747          | -4752.543029    | 0.413236          | -0.095970         | -4752.225763 |
| <sup>5</sup> RC  | 6.0700                | -4738.467293         | -4742.686605          | -4752.480446    | 0.407957          | -0.094620         | -4752.167109 |
| <sup>5</sup> TS1 | 6.0541                | -4738.430235         | -4742.650311          | -4752.444785    | 0.407374          | -0.100225         | -4752.137636 |
| <sup>5</sup> IM1 | 6.0419                | -4738.436730         | -4742.658488          | -4752.450750    | 0.410224          | -0.099317         | -4752.139843 |
| <sup>5</sup> M2  | 6.0447                | -4738.463890         | -4742.674649          | -4752.467751    | 0.415992          | -0.101498         | -4752.153257 |
| <sup>5</sup> TS3 | 6.0611                | -4738.437737         | -4742.653838          | -4752.451603    | 0.413502          | -0.101039         | -4752.139139 |
| <sup>5</sup> PC  | 6.0347                | -4738.524045         | -4742.751098          | -4752.538029    | 0.414945          | -0.097205         | -4752.220289 |
| <sup>1</sup> RC  | 2.0255                | -4738.456674         | -4742.673231          | -4752.465142    | 0.404743          | -0.096824         | -4752.157223 |
| <sup>1</sup> TS1 | 1.7305                | -4738.409761         | -4742.624851          | -4752.417940    | 0.405337          | -0.096593         | -4752.109196 |
| <sup>1</sup> IM1 | 1.7220                | -4738.417463         | -4742.635421          | -4752.430804    | 0.410513          | -0.095565         | -4752.115856 |
| <sup>1</sup> IM2 | 0.0000                | -4738.43993          | -4742.673231          | -4752.447622    | 0.421070          | -0.101907         | -4752.128459 |
| <sup>1</sup> TS3 | 0.0000                | -4738.437871         | -4742.65272           | -4752.445865    | 0.421825          | -0.101828         | -4752.125868 |
| <sup>1</sup> PC  | 0.0000                | -4738.523724         | -4742.740903          | -4752.539860    | 0.418498          | -0.096879         | -4752.218241 |

**Table S9.** Calculated relative energies (kcal mol<sup>-1</sup>) for the key species involved in the reaction of [(TPFC)Mn(OH)(O<sub>2</sub>)]<sup>-</sup> with THF at the TPSSh level.

| species          | $\Delta E$<br>(def2-SVP) | $\Delta E$<br>(def2-TZVP) | $\Delta(\text{DKH})$ | $\Delta G$ |
|------------------|--------------------------|---------------------------|----------------------|------------|
| <sup>3</sup> RC  | 0.0                      | 0.0                       | 0.0                  | 0.0        |
| <sup>3</sup> TS1 | 24.5                     | 24.2                      | 24.7                 | 21.9       |
| <sup>3</sup> IM1 | 21.6                     | 20.2                      | 20.7                 | 19.5       |
| <sup>3</sup> IM2 | -3.8                     | -0.4                      | -0.9                 | 3.0        |
| <sup>3</sup> TS3 | 7.7                      | 10.8                      | 7.7                  | 10.1       |
| <sup>3</sup> PC  | -35.1                    | -36.9                     | -35.9                | -33.0      |
| <sup>5</sup> RC  | 2.5                      | 2.7                       | 3.4                  | 3.8        |
| <sup>5</sup> TS1 | 25.8                     | 25.5                      | 25.8                 | 22.3       |
| <sup>5</sup> IM1 | 21.7                     | 20.3                      | 22.0                 | 20.9       |
| <sup>5</sup> IM2 | 4.7                      | 10.2                      | 11.4                 | 12.5       |
| <sup>5</sup> TS3 | 21.1                     | 23.3                      | 21.5                 | 21.4       |
| <sup>5</sup> PC  | -33.1                    | -37.8                     | -32.7                | -29.6      |
| <sup>1</sup> RC  | 9.2                      | 11.1                      | 13.0                 | 10.0       |
| <sup>1</sup> TS1 | 38.6                     | 41.4                      | 42.6                 | 40.2       |
| <sup>1</sup> IM1 | 33.8                     | 34.8                      | 34.5                 | 36.0       |
| <sup>1</sup> IM2 | 19.7                     | 11.1                      | 24.0                 | 28.1       |
| <sup>1</sup> TS3 | 21.0                     | 24.0                      | 25.1                 | 29.7       |
| <sup>1</sup> PC  | -32.9                    | -31.4                     | -33.9                | -28.3      |

**Table S10.** Spin density distribution for the key species involved in the reaction of [(TPFC)Mn(OH)(O<sub>2</sub>)]<sup>-</sup> with THF at the TPSSh level.

| species          | Mn   | O1    | O2    | O(H)  | THF   | Corrole |
|------------------|------|-------|-------|-------|-------|---------|
| <sup>3</sup> RC  | 3.11 | -0.51 | -0.51 | 0.11  | 0.00  | -0.20   |
| <sup>3</sup> TS1 | 2.94 | -0.04 | -0.24 | 0.09  | -0.67 | -0.07   |
| <sup>3</sup> IM1 | 2.98 | 0.02  | -0.05 | 0.07  | -0.94 | -0.07   |
| <sup>3</sup> IM2 | 1.94 | 0.03  | 0.01  | 0.08  | 0.00  | -0.06   |
| <sup>3</sup> TS3 | 2.05 | -0.04 | -0.02 | 0.07  | 0.00  | -0.06   |
| <sup>3</sup> PC  | 2.52 | 0.18  | 0.00  | -0.09 | 0.00  | -0.61   |
| <sup>5</sup> RC  | 3.07 | 0.31  | 0.54  | 0.10  | 0.00  | -0.02   |
| <sup>5</sup> TS1 | 2.99 | 0.07  | 0.28  | 0.08  | 0.65  | -0.08   |
| <sup>5</sup> IM1 | 2.98 | 0.02  | 0.02  | 0.07  | 0.95  | -0.03   |
| <sup>5</sup> IM2 | 3.79 | -0.01 | 0.01  | 0.04  | 0.00  | 0.16    |
| <sup>5</sup> TS3 | 3.68 | 0.14  | 0.06  | 0.10  | 0.01  | 0.01    |
| <sup>5</sup> PC  | 2.59 | 0.49  | 0.01  | 0.10  | 0.00  | 0.81    |
| <sup>1</sup> RC  | 1.95 | -0.96 | -0.97 | 0.07  | 0.00  | -0.09   |
| <sup>1</sup> TS1 | 1.54 | -0.39 | -0.43 | 0.04  | -0.69 | -0.06   |
| <sup>1</sup> IM1 | 1.29 | -0.27 | -0.15 | 0.05  | -0.93 | 0.01    |
| <sup>1</sup> IM2 | 0.00 | 0.00  | 0.00  | 0.00  | 0.00  | 0.00    |
| <sup>1</sup> TS3 | 0.00 | 0.00  | 0.00  | 0.00  | 0.00  | 0.00    |
| <sup>1</sup> PC  | 0.00 | 0.00  | 0.00  | 0.00  | 0.00  | 0.00    |

### Part III. Mn(V)-Oxo Complexes with and without the Axial OH<sup>-</sup> Ligand.

**Table S11.** Absolute energies (in Hartree) for [(TPFC)Mn<sup>V</sup>(O)].

| species                          | <i>E1</i>    | <i>E2</i>    | <i>E2+ZPE</i> | <i>G</i>     | <i>H</i>     |
|----------------------------------|--------------|--------------|---------------|--------------|--------------|
| <sup>1</sup> Mn <sup>V</sup> (O) | -4355.168860 | -4358.951122 | -4358.571425  | -4358.652367 | -4358.524462 |
| <sup>3</sup> Mn <sup>V</sup> (O) | -4355.148294 | -4358.932107 | -4358.554347  | -4358.636827 | -4358.506901 |
| <sup>5</sup> Mn <sup>V</sup> (O) | -4355.145410 | -4358.928846 | -4358.552352  | -4358.635786 | -4358.504762 |

**Table S12.** Calculated relative energies (kcal mol<sup>-1</sup>) for [(TPFC)Mn<sup>V</sup>(O)].

| species                          | $\Delta E1$ | $\Delta E2(TZVP)$ | $\Delta(E2+ZPE)$ | $\Delta G$ | $\Delta H$ |
|----------------------------------|-------------|-------------------|------------------|------------|------------|
| <sup>1</sup> Mn <sup>V</sup> (O) | 0.0         | 0.0               | 0.0              | 0.0        | 0.0        |
| <sup>3</sup> Mn <sup>V</sup> (O) | 12.9        | 11.9              | 10.7             | 9.8        | 11.0       |
| <sup>5</sup> Mn <sup>V</sup> (O) | 14.7        | 14.0              | 12.0             | 10.4       | 12.4       |

**Table S13.** Spin density distribution for [(TPFC)Mn<sup>V</sup>(O)].

| species                          | Mn   | O     | Corrole |
|----------------------------------|------|-------|---------|
| <sup>1</sup> Mn <sup>V</sup> (O) | 0.00 | 0.00  | 0.00    |
| <sup>3</sup> Mn <sup>V</sup> (O) | 2.15 | -0.01 | -0.14   |
| <sup>5</sup> Mn <sup>V</sup> (O) | 2.55 | 0.51  | 0.94    |

**Table S14.** Absolute energies (in Hartree) for [(TPFC)Mn<sup>V</sup>(O)(OH)]<sup>-</sup>

| species                                              | <i>E1</i>    | <i>E2(TZVP)</i> | <i>E2+ZPE</i> | <i>G</i>     | <i>H</i>     |
|------------------------------------------------------|--------------|-----------------|---------------|--------------|--------------|
| [ <sup>1</sup> Mn <sup>V</sup> (O)(OH)] <sup>-</sup> | -4431.039474 | -4434.915803    | -4434.52503   | -4434.607781 | -4434.476035 |
| [ <sup>3</sup> Mn <sup>V</sup> (O)(OH)] <sup>-</sup> | -4431.037788 | -4434.918989    | -4434.530173  | -4434.614865 | -4434.480583 |
| [ <sup>5</sup> Mn <sup>V</sup> (O)(OH)] <sup>-</sup> | -4431.031849 | -4434.914026    | -4434.525013  | -4434.609727 | -4434.475545 |

**Table S15.** Calculated relative energies (kcal mol<sup>-1</sup>) for [(TPFC)Mn<sup>V</sup>(O)(OH)]<sup>-</sup>

| species                                              | $\Delta E1$ | $\Delta E2(TZVP)$ | $\Delta(E2+ZPE)$ | $\Delta G$ | $\Delta H$ |
|------------------------------------------------------|-------------|-------------------|------------------|------------|------------|
| [ <sup>1</sup> Mn <sup>V</sup> (O)(OH)] <sup>-</sup> | -1.1        | 2.0               | 3.2              | 4.4        | 2.9        |
| [ <sup>3</sup> Mn <sup>V</sup> (O)(OH)] <sup>-</sup> | 0.0         | 0.0               | 0.0              | 0.0        | 0.0        |
| [ <sup>5</sup> Mn <sup>V</sup> (O)(OH)] <sup>-</sup> | 3.7         | 3.1               | 3.2              | 3.2        | 3.2        |

## Part IV. Bond Dissociation Free Energies and Reaction Energies

**Table S16.** Calculated bond dissociation energies of corresponding species.

| species                                   | <i>E</i> (def2-SVP) | <i>E</i> (def2-TZVP) | <i>G</i>     |
|-------------------------------------------|---------------------|----------------------|--------------|
| H                                         | -0.499275101        | -0.499871126         | -0.510525126 |
| THF-H(radical)                            | -231.6470925        | -231.9018587         | -231.8273917 |
| THF                                       | -232.3010329        | -232.5568499         | -232.4687359 |
| <b>BDE(C-H)</b> (kcal mol <sup>-1</sup> ) | <b>97.1</b>         | <b>97.3</b>          | <b>82.1</b>  |

  

| species                                      | <i>E</i> (def2-SVP) | <i>E</i> (def2-TZVP) | <i>G</i>     |
|----------------------------------------------|---------------------|----------------------|--------------|
| [(TPFC)Mn(O <sub>2</sub> )(OH)] <sup>-</sup> | -4506.165702        | -4510.133697         | -4509.912044 |
| [(TPFC)Mn(OOH)(OH)] <sup>-</sup>             | -4506.782641        | -4510.754037         | -4510.521651 |
| <b>BDE(O-H)</b> (kcal mol <sup>-1</sup> )    | <b>73.8</b>         | <b>75.6</b>          | <b>62.1</b>  |

**Table S17.** Calculated reaction energies.

| species                                                | <i>E</i> (def2-SVP) | <i>E</i> (def2-TZVP) | <i>G</i>     | <i>H</i>     |
|--------------------------------------------------------|---------------------|----------------------|--------------|--------------|
| OH radical                                             | -75.67095132        | -75.76993585         | -75.77857585 | -75.75832685 |
| [(TPFC)Mn(OOH)(OH)] <sup>-</sup>                       | -4506.782641        | -4510.754037         | -4510.436389 | -4510.298895 |
| [(TPFC)Mn <sup>V</sup> (O)(OH)] <sup>-</sup>           | -4431.037788        | -4434.918989         | -4434.614865 | -4434.480583 |
| <b>Δ<i>E</i><sup>1</sup></b> (kcal mol <sup>-1</sup> ) | <b>46.4</b>         | <b>40.9</b>          | <b>27.0</b>  | <b>37.6</b>  |

  

| species                                                | <i>E</i> (def2-SVP) | <i>E</i> (def2-TZVP) | <i>G</i>     | <i>H</i>     |
|--------------------------------------------------------|---------------------|----------------------|--------------|--------------|
| OH <sup>-</sup>                                        | -75.78977428        | -75.93492373         | -75.94320073 | -75.92361073 |
| [(TPFC)Mn(OOH)(OH)] <sup>-</sup>                       | -4506.782641        | -4510.754037         | -4510.436389 | -4510.298895 |
| [(TPFC)Mn <sup>VI</sup> (O)(OH)]                       | -4430.866227        | -4434.744981         | -4434.440021 | -4434.306179 |
| <b>Δ<i>E</i><sup>2</sup></b> (kcal mol <sup>-1</sup> ) | <b>79.5</b>         | <b>46.5</b>          | <b>33.4</b>  | <b>43.4</b>  |

<sup>1</sup> Reaction energy for the homolytic O-O bond cleavage: [(TPFC)Mn(OH)(OOH)]<sup>-</sup> → [(TPFC)Mn(OH)(O)]<sup>-</sup> + HO•

<sup>2</sup> Reaction energy for the heterolytic O-O bond cleavage: [(TPFC)Mn(OH)(OOH)]<sup>-</sup> → [(TPFC)Mn(OH)(O)] + HO<sup>-</sup>

## Part V. Cartesian Coordinates for all the Species

### A. [(TPFC)Mn<sup>III</sup>(O<sub>2</sub>)]

#### B3LYP-Optimized <sup>1</sup>[(TPFC)Mn<sup>III</sup>(O<sub>2</sub>)]

|   |                 |                 |                 |
|---|-----------------|-----------------|-----------------|
| C | 1.254166523984  | -0.595289088178 | 5.636430325353  |
| C | -0.084787522620 | -0.995061711124 | 5.909040692257  |
| C | -0.829148014590 | -2.040871146874 | 5.260398579765  |
| H | -0.466701778035 | -2.685132887966 | 4.462528173218  |
| C | -2.087908699859 | -2.046567775282 | 5.819152991790  |
| H | -2.917475984452 | -2.695018517788 | 5.546202348638  |
| C | -2.123467614632 | -1.005438970101 | 6.811375195420  |
| C | -3.265277761848 | -0.620723836996 | 7.595672820741  |
| C | -3.279583353365 | 0.491493850517  | 8.457444404136  |
| C | -4.325877518842 | 1.096944418446  | 9.250211497529  |
| H | -5.345927344012 | 0.731379767924  | 9.351970258015  |
| C | -3.795342518300 | 2.234848883848  | 9.839930017925  |
| H | -4.313402652300 | 2.937965756412  | 10.489480183444 |
| C | -2.426337848128 | 2.312414108953  | 9.421229012001  |
| C | -1.285387060199 | 3.193758872801  | 9.571731096859  |
| C | -0.970495151969 | 4.454862086026  | 10.178463011491 |
| H | -1.640456600702 | 5.068450199806  | 10.777863884594 |
| C | 0.339414931431  | 4.744988270752  | 9.829747829440  |
| H | 0.900085194686  | 5.637555127286  | 10.101482675819 |
| C | 0.821073602352  | 3.655782892941  | 9.007524402524  |
| C | 2.032805366136  | 3.456789225941  | 8.322787922757  |
| C | 2.271656098629  | 2.345761388711  | 7.439124846137  |
| C | 3.482583487490  | 2.084715304405  | 6.706756733553  |
| H | 4.394598523814  | 2.675715576546  | 6.749803806963  |
| C | 3.271359490552  | 0.952745037044  | 5.952218594962  |
| H | 3.983213178230  | 0.472881816960  | 5.284462097360  |
| C | 1.926873864709  | 0.513677266711  | 6.216588011216  |
| C | 2.007090396726  | -1.401133358745 | 4.629534158903  |
| C | 2.390951124294  | -2.722530173724 | 4.896449783550  |
| C | 3.093375709370  | -3.488250822010 | 3.965224870452  |
| C | 3.422902600322  | -2.934669363639 | 2.726658089810  |
| C | 3.050678570472  | -1.622277415397 | 2.429932222343  |
| C | 2.352489016031  | -0.873353138236 | 3.377951445404  |
| C | 3.112966853350  | 4.468122666678  | 8.497348068460  |
| C | 3.544310912897  | 5.275506766074  | 7.434536905809  |
| C | 4.543306498010  | 6.235667921283  | 7.595552296952  |
| C | 5.136780857917  | 6.409557740233  | 8.847386543285  |
| C | 4.728474628351  | 5.622705389812  | 9.925586378172  |
| C | 3.725288049756  | 4.669920563043  | 9.742933816007  |
| C | -4.509061079355 | -1.430641093091 | 7.459662800303  |
| C | -4.556009874969 | -2.765389824383 | 7.887748879231  |
| C | -5.713356874428 | -3.536078598001 | 7.776419336551  |
| C | -6.864607945417 | -2.973705974543 | 7.221643132935  |
| C | -6.848966512688 | -1.648502930126 | 6.783684144324  |
| C | -5.681018686441 | -0.894599326856 | 6.907460867847  |
| F | 2.095300931089  | -3.278163635621 | 6.071893565425  |
| F | 3.452357431798  | -4.737072538884 | 4.251059172996  |
| F | 4.089190449629  | -3.655027859893 | 1.832660634912  |
| F | 3.357869124898  | -1.096195382975 | 1.247110293580  |
| F | 2.003421864188  | 0.373559869176  | 3.059404635443  |
| F | 2.985866985931  | 5.148086159539  | 6.230232812999  |
| F | 4.924980052831  | 6.991444532106  | 6.569299415109  |
| F | 6.088010080856  | 7.320676483474  | 9.011321341353  |
| F | 5.297927938735  | 5.782638444249  | 11.117320763467 |
| F | 3.366656694965  | 3.930154666848  | 10.792627015533 |
| F | -3.476576030898 | -3.328931616403 | 8.431260202445  |
| F | -5.728407096882 | -4.796999406606 | 8.200529201059  |
| F | -7.971355815277 | -3.698165430369 | 7.110711060627  |
| F | -7.942683084742 | -1.113825718883 | 6.246839516241  |
| F | -5.699443007825 | 0.363373032179  | 6.465239590068  |
| N | 1.357615532999  | 1.368322948840  | 7.132279970416  |

|    |                 |                 |                |
|----|-----------------|-----------------|----------------|
| N  | -0.197358308042 | 2.749444128026  | 8.898557035023 |
| N  | -2.156356817804 | 1.257524271380  | 8.616536919128 |
| N  | -0.894677803086 | -0.390172412855 | 6.838972957840 |
| Mn | -0.331079056965 | 1.021300446801  | 8.052243421265 |
| O  | 0.355493402693  | -0.009030496003 | 9.443447052213 |
| O  | -0.373002551446 | -0.919819430220 | 9.928426268614 |

#### B3LYP-Optimized <sup>3</sup>[(TPFC)Mn<sup>III</sup>(O<sub>2</sub>)]

|   |                 |                 |                 |
|---|-----------------|-----------------|-----------------|
| C | 1.219823285212  | -0.525349609720 | 5.532741624030  |
| C | -0.115211450964 | -0.916338949578 | 5.802222259148  |
| C | -0.831032478553 | -2.032527268798 | 5.240691675126  |
| H | -0.436665911055 | -2.730235307939 | 4.505190189153  |
| C | -2.091522721554 | -2.042196678081 | 5.788838557784  |
| H | -2.888386794516 | -2.750108397722 | 5.570978224944  |
| C | -2.189279879471 | -0.934635925984 | 6.702482464266  |
| C | -3.307498937273 | -0.570186680295 | 7.488346366689  |
| C | -3.319845285854 | 0.567031156895  | 8.339108763203  |
| C | -4.304895736231 | 1.077638680852  | 9.251680793515  |
| H | -5.285825654731 | 0.642865142058  | 9.435554722608  |
| C | -3.775651424048 | 2.211074714133  | 9.866619842173  |
| H | -4.261642744274 | 2.832501392588  | 10.616749485793 |
| C | -2.467046432383 | 2.397861711701  | 9.339806475097  |
| C | -1.340678044240 | 3.260418293765  | 9.499898703529  |
| C | -0.959272107802 | 4.428000905909  | 10.219005545636 |
| H | -1.580762873225 | 4.984177819013  | 10.918633560453 |
| C | 0.352503468080  | 4.722589382411  | 9.851758255857  |
| H | 0.949918544516  | 5.558890569338  | 10.210486321301 |
| C | 0.783678811713  | 3.727827075624  | 8.908821647148  |
| C | 2.011669457492  | 3.531923284922  | 8.223083144926  |
| C | 2.232104017897  | 2.461526020370  | 7.325387650998  |
| C | 3.459533424837  | 2.133028965367  | 6.650011564571  |
| H | 4.393967373478  | 2.682760434885  | 6.741242127392  |
| C | 3.244363006457  | 0.999587405095  | 5.902399450610  |
| H | 3.974218590481  | 0.478269232073  | 5.286847129641  |
| C | 1.874915959254  | 0.598774045559  | 6.095048337928  |
| C | 2.005956820200  | -1.375072029742 | 4.589120243918  |
| C | 2.401823541522  | -2.676483836449 | 4.928709094215  |
| C | 3.135259642317  | -3.480543938631 | 4.055019755523  |
| C | 3.496327162193  | -2.984521410465 | 2.801368269790  |
| C | 3.120202023799  | -1.692048013125 | 2.432486869008  |
| C | 2.384161467759  | -0.908435933191 | 3.322471628990  |
| C | 3.119234586750  | 4.498475868372  | 8.468509513626  |
| C | 3.586301126217  | 5.351860679151  | 7.458056726912  |
| C | 4.614172112909  | 6.269422508386  | 7.679223507912  |
| C | 5.202160928030  | 6.354842874662  | 8.942195914812  |
| C | 4.759868191222  | 5.521102532733  | 9.970405268120  |
| C | 3.731754190274  | 4.609730243865  | 9.725134439096  |
| C | -4.529750434650 | -1.420883794130 | 7.434982022883  |
| C | -4.531912578537 | -2.741285582988 | 7.908096090909  |
| C | -5.675216063516 | -3.540548630228 | 7.869245924343  |
| C | -6.862879072844 | -3.020818350795 | 7.352171966854  |
| C | -6.896126318348 | -1.709070728848 | 6.876665453206  |
| C | -5.739686813331 | -0.929376324941 | 6.923433785288  |
| F | 2.081671441213  | -3.181984431847 | 6.121740878662  |
| F | 3.497523264480  | -4.711697061565 | 4.411329294977  |
| F | 4.195833843036  | -3.740577333392 | 1.961556486787  |
| F | 3.459274990716  | -1.218180583780 | 1.234834463681  |
| F | 2.036538088048  | 0.319742851028  | 2.932438279825  |
| F | 3.040195952258  | 5.308943537164  | 6.241170719370  |
| F | 5.029810103563  | 7.068013288949  | 6.697999357716  |
| F | 6.180585958212  | 7.225977651415  | 9.164417052418  |
| F | 5.324622035548  | 5.594665506117  | 11.174101796031 |
| F | 3.344839486482  | 3.821074784014  | 10.729814923801 |

F -3.420061159021 -3.269195667437 8.423826833279  
 F -5.642652862378 -4.789168313334 8.330953580639  
 F -7.957816178316 -3.772527035997 7.312044563753  
 F -8.025935703479 -1.212792907627 6.376165554385  
 F -5.807632341053 0.315787859307 6.448026961477  
 N 1.291091619871 1.504225976827 6.957538673420  
 N -0.265961677482 2.873995009523 8.729135111819  
 N -2.240018088277 1.397711613332 8.418756214198  
 N -0.967092975630 -0.269253754731 6.674223283492  
 Mn -0.523640391856 1.368298175726 7.577035797093  
 O 0.211647199985 -0.273502888330 9.683726150922  
 O -0.446352581130 -1.228973823442 9.991540663330

F 3.331434884712 3.821885619035 10.756068006702  
 F -3.407268408937 -3.272154437328 8.457674142499  
 F -5.624275380113 -4.800844725901 8.360518365059  
 F -7.937564541126 -3.796755959081 7.325693493577  
 F -8.010455309350 -1.241314203480 6.379097398035  
 F -5.798442029915 0.295993860883 6.456507704303  
 N 1.302312234448 1.480358882358 6.985159989210  
 N -0.258286754536 2.862097973096 8.746327053443  
 N -2.235376571682 1.393121846696 8.432805208890  
 N -0.961199972878 -0.281698383335 6.689730859855  
 Mn -0.478782909142 1.289051045736 7.683464682615  
 O 0.171061152585 -0.153803215939 9.512260013054  
 O -0.506062055368 -1.102458498658 9.843389791258

**B3LYP-Optimized <sup>5</sup>[(TPFC)Mn<sup>III</sup>(O<sub>2</sub>)]**

C 1.220518207633 -0.533741282546 5.539720816696  
 C -0.114621533694 -0.924559894973 5.809644134865  
 C -0.834442272193 -2.036154410571 5.245142021036  
 H -0.446087812821 -2.728223373325 4.501219759495  
 C -2.090272503048 -2.050341275132 5.804483997172  
 H -2.889725331347 -2.755225745369 5.586613422350  
 C -2.180344655483 -0.947342659513 6.724347641868  
 C -3.299612093943 -0.578760204310 7.511917026274  
 C -3.319207986852 0.568036556850 8.347906405377  
 C -4.317297039701 1.101276630168 9.234017732735  
 H -5.304993221720 0.677684585283 9.406956137998  
 C -3.791445008596 2.241970134836 9.837000620491  
 H -4.287297222739 2.882017845097 10.564604240264  
 C -2.471446884044 2.409959243906 9.330334685542  
 C -1.341839548484 3.269880770091 9.491127309087  
 C -0.968681477736 4.455657730442 10.185629160900  
 H -1.600319274992 5.031963403264 10.859310625475  
 C 0.347655069806 4.739540253245 9.828650317760  
 H 0.940522455415 5.585730073087 10.171266968745  
 C 0.789811503250 3.720388403364 8.916597668141  
 C 2.021003524992 3.513602616727 8.242560671827  
 C 2.243405933839 2.437622568139 7.349370175081  
 C 3.466375362614 2.116737903806 6.662795028366  
 H 4.399514243923 2.669471611902 6.747955170093  
 C 3.246774840098 0.989956659279 5.906358502648  
 H 3.971615120538 0.477147721050 5.277976934620  
 C 1.880353719324 0.584591668909 6.108318616388  
 C 2.001188389609 -1.375696013415 4.584538234559  
 C 2.399676464884 -2.679320446004 4.911784070491  
 C 3.129551745856 -3.474978186706 4.027496490019  
 C 3.482655010070 -2.968130977494 2.77587245322  
 C 3.102711571641 -1.673260014368 2.419276182355  
 C 2.371103958683 -0.897650944828 3.319780968050  
 C 3.127867166671 4.481040986220 8.487471835712  
 C 3.603254049923 5.326684229457 7.474483186462  
 C 4.628806487075 6.246203225282 7.698016719036  
 C 5.205259380364 6.341439049160 8.965667430804  
 C 4.754141562582 5.515519737893 9.996381422606  
 C 3.728294988201 4.602221847266 9.749057805568  
 C -4.520144554706 -1.431879175585 7.458344512312  
 C -4.519007885579 -2.750709371034 7.935828710852  
 C -5.659165189749 -3.554195456014 7.894346475958  
 C -6.845974907001 -3.040804948097 7.368874779196  
 C -6.881799859771 -1.731077153949 6.887959382062  
 C -5.728802874085 -0.946540651013 6.937996703863  
 F 2.086332829558 -3.194185146478 6.102358767865  
 F 3.495466263331 -4.708274602398 4.371611098851  
 F 4.178394880751 -3.716215506517 1.926212091027  
 F 3.434279222545 -1.189419931279 1.223766487215  
 F 2.019889884947 0.333328899209 2.942780832568  
 F 3.067149395093 5.274596229996 6.253701973532  
 F 5.052710785740 7.037636308689 6.714805863560  
 F 6.181100207999 7.214594595855 9.189945414150  
 F 5.307648572631 5.598802078866 11.204440809813

**B3LYP-Optimized <sup>7</sup>[(TPFC)Mn<sup>III</sup>(O<sub>2</sub>)]**

C 1.248889995235 -0.521374599914 5.534763042245  
 C -0.083008851826 -0.918622435317 5.814965947563  
 C -0.806354650721 -2.024813368398 5.242038306632  
 H -0.419521259480 -2.712810474659 4.493419183374  
 C -2.064398589512 -2.036260616263 5.796242538608  
 H -2.866397748856 -2.735985040791 5.570553601285  
 C -2.152882813665 -0.939742696958 6.724749821877  
 C -3.270686967306 -0.570952962091 7.509131179399  
 C -3.280995757908 0.565230531059 8.362103172899  
 C -4.278530166873 1.098284145903 9.248471447809  
 H -5.268483725010 0.677971971598 9.417138810293  
 C -3.750812714290 2.236899025821 9.855628232244  
 H -4.247404597137 2.876658432052 10.583125309295  
 C -2.430288023067 2.403851348251 9.351138437656  
 C -1.307122897735 3.274341377796 9.498671050164  
 C -0.935908457248 4.462932292365 10.188359195021  
 H -1.563256002540 5.033163818253 10.871322577999  
 C 0.374720540537 4.757941432235 9.816179155825  
 H 0.964352521831 5.608780663195 10.153098227360  
 C 0.814459685325 3.743481513976 8.898219890227  
 C 2.041066295522 3.547203602519 8.208409693930  
 C 2.263699905896 2.471319274652 7.317367433881  
 C 3.484054028776 2.154887988056 6.622386042689  
 H 4.413521298536 2.715653131851 6.695750972651  
 C 3.268228868076 1.019518580001 5.877901081542  
 H 3.992793970417 0.507650234270 5.248291179138  
 C 1.905714729574 0.604302178894 6.093229641746  
 C 2.025950145200 -1.359599887567 4.573494484190  
 C 2.428915344433 -2.663420891609 4.895121900724  
 C 3.155356572084 -3.456440208006 4.005591496932  
 C 3.501830458253 -2.946740631802 2.753338834580  
 C 3.117761536948 -1.651852932331 2.401618592875  
 C 2.388804068597 -0.879604895540 3.307213112095  
 C 3.141910752290 4.524580364634 8.440840743830  
 C 3.601040083611 5.373447865344 7.423016847606  
 C 4.621463993538 6.301399826273 7.635577175900  
 C 5.209405331268 6.403033946571 8.897341657786  
 C 4.774720461105 5.574566769765 9.932990983896  
 C 3.754371454312 4.652393583729 9.696097343004  
 C -4.497373076982 -1.414712535783 7.446185775394  
 C -4.509091619775 -2.734728969102 7.920498193254  
 C -5.655362070165 -3.529359410083 7.871675654090  
 C -6.836130376137 -3.005453307525 7.343218025033  
 C -6.859683408056 -1.694075744787 6.866234750519  
 C -5.700507396147 -0.919085800744 6.922973642480  
 F 2.123339564302 -3.182048206772 6.086438583217  
 F 3.525205195004 -4.690039543651 4.345655244004  
 F 4.195007054199 -3.692034253395 1.898613137196  
 F 3.442377221865 -1.164920865472 1.205089373070  
 F 2.032947020002 0.351047017755 2.932408202949  
 F 3.053978646789 5.316688352898 6.207029667090  
 F 5.029553003471 7.095261995227 6.647238071983  
 F 6.180556662439 7.284454792004 9.111385219300



F 5.339364651433 5.663428185202 11.135814750534  
 F 3.374911815861 3.869375621115 10.708102651698  
 F -3.404251956108 -3.267748150220 8.445841357567  
 F -5.632109375305 -4.777997910160 8.334323254277  
 F -7.933709575082 -3.752981351162 7.293406756753  
 F -7.982818451709 -1.193789630615 6.354463601576  
 F -5.759124927749 0.325744487198 6.445064135983  
 N 1.329294182165 1.501673089331 6.967745862650  
 N -0.227487689392 2.876994594724 8.740777600530  
 N -2.193423775675 1.383301133572 8.456572413759  
 N -0.926579127454 -0.283658506118 6.702581354512  
 Mn -0.458645287532 1.319585382225 7.654283426530  
 O -0.472649908462 -0.986065867579 10.471220414521  
 O -1.284967813989 -1.818030855900 10.173568532761

F 6.096709557384 7.313053403642 9.011645601133  
 F 5.272929036845 5.804076493119 11.128724597294  
 F 3.334533658553 3.954256320809 10.802213504858  
 F -3.450641334937 -3.333655432293 8.419727786732  
 F -5.700787034459 -4.812160570165 8.194550263343  
 F -7.956739759375 -3.714551377807 7.125193017486  
 F -7.945541021008 -1.123090263989 6.275659371284  
 F -5.703647646870 0.364028533692 6.488365751946  
 N 1.344170088220 1.378274213221 7.126932120597  
 N -0.202452002240 2.751469801993 8.881331180823  
 N -2.150075137030 1.263462328106 8.608494326316  
 N -0.893834139485 -0.376043935076 6.840098374225  
 Mn -0.336290869011 1.029836068903 8.044177794356  
 O 0.303876581532 -0.003818876552 9.386855017971  
 O -0.417445480929 -0.937703181838 9.860167115233

**TPSSH-Optimized <sup>1</sup>[(TPFC)Mn<sup>III</sup>(O<sub>2</sub>)]**

C 1.251067239462 -0.586508498402 5.634256162033  
 C -0.088674220252 -0.984723746914 5.906836561445  
 C -0.830242555521 -2.031269005833 5.260084568252  
 H -0.465457314791 -2.672582147270 4.460715494162  
 C -2.087240453326 -2.041626639105 5.824478623891  
 H -2.917993512920 -2.691047370990 5.556717819371  
 C -2.122051544762 -1.001446846058 6.815483043819  
 C -3.260540126984 -0.619888838063 7.598198386869  
 C -3.275536198936 0.495751231378 8.458628662290  
 C -4.319120505758 1.094274310466 9.253032129680  
 H -5.336090427299 0.721545010085 9.358983567871  
 C -3.791248999052 2.236698907361 9.840110133587  
 H -4.309198021299 2.938137625704 10.491011129434  
 C -2.426932705529 2.320385855211 9.417019889278  
 C -1.289963734807 3.199630059536 9.562437721510  
 C -0.971952410610 4.456567406702 10.173534160818  
 H -1.640702564595 5.067859174877 10.775924990772  
 C 0.338294529739 4.744784298342 9.824827761489  
 H 0.903340228760 5.633629722044 10.099516175529  
 C 0.816941065516 3.658088240964 8.999576745081  
 C 2.030515272245 3.460459348509 8.319518835162  
 C 2.266857162323 2.348554450523 7.438208269173  
 C 3.481767280494 2.080578008551 6.717876201139  
 H 4.396118859037 2.667384199792 6.771784661274  
 C 3.269932502034 0.948659329738 5.961943935129  
 H 3.982873223113 0.459995970365 5.301489658437  
 C 1.921593114310 0.519991724648 6.215390064347  
 C 2.003052495999 -1.392904487399 4.630976476315  
 C 2.361962269381 -2.724288680479 4.889225946693  
 C 3.063912149047 -3.492454690938 3.958993478816  
 C 3.417402507115 -2.931319788333 2.729450629007  
 C 3.070597157825 -1.609356576744 2.440663607367  
 C 2.373097230659 -0.858073362699 3.388082916186  
 C 3.111714747157 4.466645956596 8.495679204504  
 C 3.561087238820 5.259207673725 7.427633820225  
 C 4.563378206118 6.216603616796 7.588944569020  
 C 5.141707080120 6.403284753963 8.846947438855  
 C 4.715953022022 5.631940780000 9.930725159508  
 C 3.709729479455 4.681827415739 9.747263179575  
 C -4.499826734055 -1.433002784896 7.465647301916  
 C -4.537712948317 -2.771913527823 7.885084941953  
 C -5.693099787692 -3.547025090631 7.777169431344  
 C -6.850858824061 -2.985053431669 7.233562249712  
 C -6.844554781144 -1.656169317971 6.803658644579  
 C -5.678754889164 -0.897752292163 6.924974955171  
 F 2.044153061419 -3.285544134490 6.058352757360  
 F 3.401057645193 -4.751004043504 4.237065579008  
 F 4.083746299415 -3.654713752104 1.835255772151  
 F 3.400294112841 -1.077117783969 1.264636490880  
 F 2.045181220839 0.398400441395 3.076854444813  
 F 3.013584426164 5.120818143782 6.217340448773  
 F 4.961675937064 6.959745655890 6.557397380830

**TPSSH-Optimized <sup>3</sup>[(TPFC)Mn<sup>III</sup>(O<sub>2</sub>)]**

C 1.226375424782 -0.545766017733 5.562027958633  
 C -0.108997769097 -0.934815621615 5.830358175613  
 C -0.834771766599 -2.030133721023 5.247323988544  
 H -0.449799494163 -2.708283612451 4.488744908721  
 C -2.090957789611 -2.046156885690 5.809507651112  
 H -2.899046572283 -2.737940692399 5.581047799622  
 C -2.171115345891 -0.958422308679 6.745058311323  
 C -3.292348711251 -0.586731129550 7.528133096672  
 C -3.310181633261 0.562082478764 8.359055003886  
 C -4.318741066217 1.113968275677 9.219402800665  
 H -5.313009578106 0.700079395999 9.377193001181  
 C -3.795579446962 2.259383926530 9.815270593852  
 H -4.299234415227 2.915841202349 10.522013328470  
 C -2.465727981631 2.409286226268 9.331439230575  
 C -1.337623733073 3.266287116799 9.493501578644  
 C -0.975071876031 4.470291593023 10.159802942712  
 H -1.617164516778 5.063429813006 10.807872547604  
 C 0.344328041656 4.747384287259 9.809224221272  
 H 0.932425643442 5.605045450521 10.130835381217  
 C 0.797682226537 3.706066477089 8.930333059582  
 C 2.031105682334 3.496747002158 8.263578861747  
 C 2.255681198706 2.413794657636 7.379662873335  
 C 3.474519832501 2.098401607226 6.687134994268  
 H 4.404727574661 2.656879550444 6.768008040528  
 C 3.252343289722 0.972419393332 5.927933053558  
 H 3.971247434574 0.461807596644 5.290750338984  
 C 1.889813596647 0.565339526884 6.137989338070  
 C 1.998172049162 -1.375365171519 4.592462427357  
 C 2.379911017019 -2.691458693490 4.892619723538  
 C 3.100735236442 -3.477785961903 3.991819754226  
 C 3.460921490318 -2.948236788404 2.750663782077  
 C 3.097947240211 -1.640579943899 2.420606173674  
 C 2.374938821791 -0.874956992390 3.337255578443  
 C 3.131482358288 4.470933164561 8.495864576969  
 C 3.616708171071 5.293980659082 7.467515601900  
 C 4.637454589720 6.222109414108 7.680523417245  
 C 5.197662138713 6.350698839668 8.953430633032  
 C 4.736296626540 5.549008788816 9.999826328073  
 C 3.716066053817 4.626111125061 9.762366727054  
 C -4.511976113612 -1.436540689629 7.466692890020  
 C -4.508569909965 -2.761113878908 7.931318996324  
 C -5.648079539557 -3.566007763421 7.883354050938  
 C -6.836469600563 -3.048073173064 7.363594446628  
 C -6.874899242656 -1.733059483719 6.894863575314  
 C -5.722204477998 -0.947511120762 6.951083591710  
 F 2.059470103910 -3.226158233039 6.074685300041  
 F 3.452613240579 -4.723977643680 4.310364681428  
 F 4.148825141894 -3.687907456793 1.884511187067  
 F 3.435994883430 -1.136128861660 1.233387322644  
 F 2.035777447351 0.368925312837 2.985696644123  
 F 3.091558362979 5.212400895340 6.241450283779

F 5.070814980261 6.992816058178 6.682535548319  
 F 6.169445384300 7.233630047082 9.168050488134  
 F 5.276102312403 5.664141645650 11.213536769418  
 F 3.308892533198 3.866858334167 10.783877105854  
 F -3.393830189416 -3.285035753380 8.449263486398  
 F -5.611969918669 -4.818540690797 8.338887139650  
 F -7.928772643256 -3.805947125716 7.314307644397  
 F -8.006100920026 -1.239992301769 6.389952801704  
 F -5.791941369528 0.300528147981 6.478465607532  
 N 1.311954952753 1.454194473546 7.025716182816  
 N -0.244491123004 2.835086179346 8.771189765520  
 N -2.215669383196 1.376569059076 8.452144786063  
 N -0.947993489932 -0.298114479382 6.724864163543  
 Mn -0.439818238123 1.223525402175 7.772730207284  
 O 0.163082342602 -0.130369560966 9.489215978925  
 O -0.531321568634 -1.072845366853 9.819409550449

F 3.126706354022 5.194307273055 6.256154097312  
 F 5.116311335799 6.959290688386 6.718360373023  
 F 6.190905276444 7.189497215636 9.214889376931  
 F 5.263225202962 5.628064387127 11.250668234352  
 F 3.283030078525 3.849178965675 10.800395340568  
 F -3.361081373544 -3.273329399377 8.479467921655  
 F -5.565173728374 -4.828820731636 8.390574002024  
 F -7.893658553443 -3.848044792257 7.362658534462  
 F -7.998248879728 -1.292232221909 6.414231548841  
 F -5.799354917042 0.270528524273 6.482921467920  
 N 1.309954192430 1.445758398408 7.034699640799  
 N -0.253873827342 2.847460782481 8.746180194366  
 N -2.225210778842 1.400749362638 8.418407100120  
 N -0.947178913606 -0.295739372580 6.724516983601  
 Mn -0.423569461901 1.186724692001 7.823779342220  
 O 0.138700066949 -0.069463494004 9.482031395716  
 O -0.602513640700 -1.012010672792 9.801802509865

**TPSSh-Optimized <sup>5</sup>[(TPFC)Mn<sup>III</sup>(O<sub>2</sub>)]**

C 1.223781378055 -0.546367663899 5.561281195633  
 C -0.110761010463 -0.935742275948 5.830070613584  
 C -0.834550200815 -2.034040885885 5.252134240329  
 H -0.451243637429 -2.7112335292149 4.493033169043  
 C -2.086748998710 -2.053366877747 5.823085028647  
 H -2.894931191727 -2.746880643151 5.600794816994  
 C -2.163204908161 -0.961702655067 6.753816755780  
 C -3.288764913372 -0.584308607569 7.534123000112  
 C -3.316826327838 0.579043049395 8.338895219536  
 C -4.331116453525 1.140852359486 9.186885519505  
 H -5.324451048226 0.726218324503 9.347768455432  
 C -3.813088444182 2.295488081635 9.766157598147  
 H -4.319530559924 2.962336821987 10.460939728945  
 C -2.480871461277 2.439536803280 9.283833430802  
 C -1.349916952530 3.293712511743 9.449198198735  
 C -0.989776210766 4.502765027213 10.109426922745  
 H -1.638680913076 5.106962568292 10.740106724975  
 C 0.335559406881 4.767213123572 9.776084671702  
 H 0.925217632687 5.624305499531 10.096036503685  
 C 0.793632111606 3.712865054308 8.915075447582  
 C 2.031556881540 3.489395595555 8.268172934527  
 C 2.257051656416 2.399612360200 7.389547207925  
 C 3.476277783182 2.085019228858 6.698371342336  
 H 4.406967693066 2.642101616037 6.781489172277  
 C 3.251180482630 0.964355063716 5.932733975604  
 H 3.967804964231 0.455129089745 5.292072573969  
 C 1.888496055050 0.560458225976 6.142575822937  
 C 1.992584256913 -1.368485788177 4.583059481718  
 C 2.377370536473 -2.686073085994 4.871593875558  
 C 3.094725443670 -3.463447566861 3.960331539512  
 C 3.446007802738 -2.923307040331 2.721081505674  
 C 3.078796701193 -1.613771280383 2.403012364686  
 C 2.360874358556 -0.856274165146 3.330151334561  
 C 3.137631269863 4.454553813198 8.510809388652  
 C 3.640110883192 5.272668917121 7.487058329806  
 C 4.666138540375 6.192195164610 7.711175408370  
 C 5.214135256287 6.315260286289 8.990057306380  
 C 4.735289299162 5.517563740579 10.031721399927  
 C 3.708981544440 4.604220663822 9.783930908339  
 C -4.500954862792 -1.444941487223 7.485033462849  
 C -4.482475283499 -2.765471896743 7.960984711499  
 C -5.614451677629 -3.581280520356 7.923854959017  
 C -6.809007292844 -3.079442374033 7.402176900896  
 C -6.861542267650 -1.769334402472 6.921125951430  
 C -5.716808296558 -0.971715186227 6.967675180978  
 F 2.063986619620 -3.229582007733 6.051094506150  
 F 3.450726578051 -4.711063266873 4.266748503581  
 F 4.129586170247 -3.654751930500 1.845236035899  
 F 3.408421807246 -1.099714700224 1.218004943194  
 F 2.017439367016 0.389745004913 2.991941666329

**TPSSh-Optimized <sup>7</sup>[(TPFC)Mn<sup>III</sup>(O<sub>2</sub>)]**

C 1.249018211442 -0.523826346302 5.542438783739  
 C -0.083330673516 -0.920708395328 5.820584328179  
 C -0.807775053427 -2.019154965147 5.239306351874  
 H -0.420512625408 -2.700798545001 4.484861451993  
 C -2.067606764301 -2.030396552295 5.793584540644  
 H -2.874172328848 -2.723709633482 5.563839799340  
 C -2.151102347037 -0.941502715806 6.728522379815  
 C -3.269320279290 -0.572655116038 7.513838394815  
 C -3.277040828206 0.561608014834 8.368266608665  
 C -4.273258761803 1.092253791899 9.255873327798  
 H -5.262024757100 0.669208588877 9.424688580491  
 C -3.746094528842 2.231195135972 9.863198493800  
 H -4.241342552246 2.870604685637 10.591362384583  
 C -2.426904629512 2.399146586251 9.357427120695  
 C -1.305486724643 3.270279420409 9.502939601682  
 C -0.936779164736 4.462393741069 10.186429788601  
 H -1.565498738512 5.033696804217 10.866635992129  
 C 0.372785619832 4.758701980824 9.810970385088  
 H 0.961805592893 5.612533812410 10.141304700052  
 C 0.813700225483 3.741024634261 8.898829280582  
 C 2.039942984292 3.546138946538 8.209471681046  
 C 2.264402301437 2.467248433107 7.321207001672  
 C 3.485891561765 2.148200535648 6.633375908827  
 H 4.415187435987 2.708844378271 6.711582879456  
 C 3.270272350812 1.010088041642 5.889903953681  
 H 3.994231736852 0.492456831854 5.264005831739  
 C 1.907635454991 0.600369726784 6.101419321108  
 C 2.023898559487 -1.360144453441 4.581351114670  
 C 2.406543070111 -2.673584260628 4.892981241222  
 C 3.131171858681 -3.467118327427 4.001598774814  
 C 3.496391225837 -2.947814919226 2.757674565119  
 C 3.133507933894 -1.643261744566 2.415752703970  
 C 2.405594499837 -0.870980154862 3.322981374444  
 C 3.138076496180 4.524508616296 8.435136650073  
 C 3.609130326998 5.354487301473 7.405677265588  
 C 4.629028567159 6.285359546078 7.611153995231  
 C 5.203668717848 6.410183215967 8.877906022799  
 C 4.757286436233 5.601556770912 9.925381523667  
 C 3.738251685743 4.675534433338 9.694926405828  
 C -4.496090395615 -1.411788260501 7.443502257209  
 C -4.508112253201 -2.741952697910 7.892084411199  
 C -5.656825046606 -3.533418948260 7.834966744778  
 C -6.840149834061 -2.996117220669 7.323763444213  
 C -6.864150576332 -1.674858554227 6.872154526824  
 C -5.702303102303 -0.903586869921 6.936627328470  
 F 2.083582673527 -3.199540014710 6.078644818151  
 F 3.483112535027 -4.710513868295 4.332221581767  
 F 4.188745103689 -3.694161329842 1.900288339994  
 F 3.475912147685 -1.148178644746 1.225453497370

F 2.066221741139 0.369255099290 2.957784540647  
 F 3.070870355168 5.277107621073 6.184751808593  
 F 5.048241476470 7.062357691353 6.611581705314  
 F 6.174932634159 7.295843552661 9.085626229878  
 F 5.311358115820 5.712160860480 11.133409281846  
 F 3.348200427275 3.908476119253 10.717685306301  
 F -3.399946704993 -3.287140798860 8.402593208736  
 F -5.634074171555 -4.792328750291 8.274683989825  
 F -7.941219577501 -3.741311486869 7.266276994926  
 F -7.990649215555 -1.162390069378 6.375122068411  
 F -5.759525894879 0.351339701899 6.479919328405  
 N 1.326551057335 1.499938832399 6.973438063670  
 N -0.225805247812 2.867885704170 8.743998999382  
 N -2.186075216423 1.378909467637 8.460521536569  
 N -0.923684915871 -0.286474160969 6.714654502462  
 Mn -0.455151694511 1.314235142913 7.660609189048  
 O -0.436784845000 -0.981931286547 10.490477040618  
 O -1.236753671444 -1.851688676154 10.262076745875

F 1.931087109911 0.377634145301 3.010523243973  
 F 3.008404071580 5.183397502806 6.239611892189  
 F 4.980650283789 7.013835412306 6.625235254222  
 F 6.138576526223 7.288091695050 9.096107616902  
 F 5.316781715519 5.709915090092 11.183246410520  
 F 3.354450050021 3.867082369887 10.808376010255  
 F -3.501712582159 -3.321008422519 8.494725483530  
 F -5.767337045613 -4.810197097957 8.279477087794  
 F -8.014447199300 -3.735353007897 7.131684312284  
 F -7.980228047741 -1.159302655502 6.190732783342  
 F -5.719616232859 0.334949640881 6.388364054867  
 N 1.279119590643 1.381346706282 7.132678117167  
 N -0.224840821288 2.734695041680 8.833402473549  
 N -2.143095231230 1.271635744615 8.555114388246  
 N -0.916281760127 -0.326006504143 6.842764255359  
 Mn -0.294911916500 0.930760524246 8.187238799071  
 O 0.257221807146 -0.028132506404 9.396676811066  
 O 0.635904167682 -0.796799524276 10.310825628643

**BP86-Optimized <sup>1</sup>[(TPFC)Mn<sup>III</sup>(O<sub>2</sub>)]**

C 1.225174629642 -0.581585994539 5.613693440984  
 C -0.104967177371 -0.960191036151 5.900338314951  
 C -0.841591761284 -2.022046495479 5.265382177692  
 H -0.460672748758 -2.671413495900 4.468658556510  
 C -2.099959293907 -2.039322687963 5.832835582005  
 H -2.936158740377 -2.699719805584 5.574635623366  
 C -2.148328290104 -0.985144518250 6.814613694289  
 C -3.293562292944 -0.625098189566 7.577533043325  
 C -3.289698983154 0.503485321703 8.415314867645  
 C -4.338430675048 1.115066909536 9.194359603327  
 H -5.362073656860 0.734427646516 9.294224626512  
 C -3.813227237448 2.268280255568 9.775075153521  
 H -4.337724740025 2.987400731155 10.415914591902  
 C -2.443032201144 2.349692465832 9.363143668534  
 C -1.325938082955 3.211002411217 9.514764559403  
 C -1.001555280828 4.467965295862 10.122872626887  
 H -1.680710819201 5.091287868698 10.717090444440  
 C 0.320835170429 4.747089176880 9.782120030145  
 H 0.900187476008 5.636506743624 10.058446848036  
 C 0.800037372918 3.656439618202 8.967521362773  
 C 2.028136754402 3.461211309762 8.311988412073  
 C 2.235276212637 2.352241810908 7.445550015502  
 C 3.449176209553 2.074404707502 6.719599409821  
 H 4.371508634365 2.663742805864 6.781696106142  
 C 3.227308996956 0.948573755826 5.952564225341  
 H 3.936514061107 0.448488111894 5.282886131492  
 C 1.875478650562 0.522411334618 6.206320561506  
 C 1.982663373088 -1.389870738643 4.609670868465  
 C 2.396470069386 -2.707795612819 4.894603711218  
 C 3.110617571874 -3.478359150107 3.961156106030  
 C 3.422253230333 -2.929479040136 2.704377489669  
 C 3.020345120641 -1.618855433920 2.390513246834  
 C 2.309309361845 -0.866684821108 3.341231195042  
 C 3.119603236205 4.458034174333 8.509223839903  
 C 3.566237869045 5.284877222507 7.456090787511  
 C 4.581840222451 6.238161359739 7.640965103874  
 C 5.172878204726 6.383895427673 8.908838060770  
 C 4.748125389942 5.576115917630 9.978618877126  
 C 3.729810213710 4.630159951126 9.770249859656  
 C -4.535487401874 -1.441997702077 7.453075823693  
 C -4.584072090022 -2.772488607228 7.921286071105  
 C -5.747618754020 -3.553411454588 7.818583305935  
 C -6.901954340359 -3.002375027604 7.233835642535  
 C -6.883969277670 -1.680075519344 6.755971991389  
 C -5.708653854666 -0.917707381244 6.870132512634  
 F 2.119090937407 -3.254527116717 6.088315844818  
 F 3.498516931965 -4.724206480654 4.260718199674  
 F 4.099989504501 -3.653131952061 1.808676604949  
 F 3.311875808626 -1.099922226944 1.191307556068

**BP86-Optimized <sup>3</sup>[(TPFC)Mn<sup>III</sup>(O<sub>2</sub>)]**

C 1.236382404563 -0.564594048902 5.580337627629  
 C -0.101889139918 -0.948618681940 5.853164604643  
 C -0.835351674623 -2.034547003014 5.250697457472  
 H -0.452603623323 -2.699452726829 4.467519648502  
 C -2.091386579769 -2.062762913565 5.830246054779  
 H -2.913092636109 -2.748829776459 5.593007213739  
 C -2.159247190446 -0.987131925124 6.787991352477  
 C -3.291907743420 -0.615397464359 7.565248503874  
 C -3.303906845523 0.544013416049 8.380545761852  
 C -4.340294033773 1.141973018849 9.186916635520  
 H -5.354357723062 0.744820216162 9.317395337025  
 C -3.819608794295 2.305409340203 9.762496005171  
 H -4.341295443679 3.004848276907 10.426837561263  
 C -2.463706875264 2.415782945906 9.321765046269  
 C -1.335741672716 3.269115679181 9.486342256562  
 C -0.994867995758 4.512216749922 10.106085908179  
 H -1.665274087813 5.139679543887 10.705708454993  
 C 0.337318679939 4.777363571789 9.774806472857  
 H 0.921790200891 5.659924960918 10.062669703488  
 C 0.815232907702 3.689311662229 8.955259438530  
 C 2.057837479002 3.477467329964 8.307649686794  
 C 2.277017648163 2.378222438807 7.433635920079  
 C 3.492150264232 2.077799002522 6.718246050834  
 H 4.424627081490 2.650092332078 6.789067661003  
 C 3.260985815015 0.955995318631 5.953380719112  
 H 3.972447388440 0.453938868538 5.277245421275  
 C 1.899936423052 0.539102292464 6.175025488805  
 C 1.999751271875 -1.378627645200 4.584856197939  
 C 2.412589703032 -2.696064941112 4.874597597199  
 C 3.129777506925 -3.470446746617 3.946440713529  
 C 3.449372974905 -2.925285339269 2.690165948734  
 C 3.051147238165 -1.614801700368 2.371434375228  
 C 2.334510924001 -0.860387130624 3.316185611115  
 C 3.153637508398 4.464904899590 8.527072465125  
 C 3.626358657787 5.290569555052 7.483974220305  
 C 4.645935652244 6.235693377802 7.688615086967  
 C 5.214040203168 6.376498959736 8.967306837447  
 C 4.762917773835 5.571022249416 10.027993669298  
 C 3.742611787621 4.632021950711 9.799138899935  
 C -4.520332420080 -1.457791623970 7.490023971674  
 C -4.532772159881 -2.783258053347 7.976146198311  
 C -5.684807628716 -3.585729044527 7.916756263689  
 C -6.865894521449 -3.062885020155 7.360762977982  
 C -6.885543121682 -1.746392877014 6.867235994550  
 C -5.720825203991 -0.962942966977 6.936353138608  
 F 2.129593286359 -3.240627870598 6.068345494729  
 F 3.514462402086 -4.716546179508 4.251057241766  
 F 4.131129964001 -3.652268584028 1.799562045411

F 3.350366616954 -1.098748416375 1.172387504022  
 F 1.960171168978 0.383924702873 2.979569929732  
 F 3.090454384290 5.196989068546 6.256797302155  
 F 5.069256419985 7.009517081835 6.681025497757  
 F 6.182897324024 7.273599177937 9.173607283873  
 F 5.310059078159 5.699476065346 11.243442839533  
 F 3.343224736868 3.870236080363 10.829569350569  
 F -3.426605907239 -3.307682667268 8.526073324795  
 F -5.668149667937 -4.836936271858 8.393476837389  
 F -7.967675413331 -3.816781680090 7.300279041598  
 F -8.007228226268 -1.251937709039 6.328309581818  
 F -5.769002036964 0.282887520215 6.438570994296  
 N 1.320581968128 1.414389563445 7.092906064228  
 N -0.221386831035 2.793586787345 8.811754964616  
 N -2.186245205542 1.344106544741 8.486586910903  
 N -0.933191057760 -0.316054181344 6.772632143884  
 Mn -0.356894422311 1.058781071168 7.991322287260  
 O 0.179888924826 -0.083734178723 9.386848617984  
 O -0.529779885423 -1.055886199500 9.774830581321

F 3.390839783027 -1.117201684593 1.183313702491  
 F 1.993433442486 0.378875700768 2.973143692064  
 F 3.095443300807 5.205252335728 6.247699503815  
 F 5.082635585817 7.005673594849 6.683663324073  
 F 6.187952558731 7.257911136521 9.181087368608  
 F 5.298523620619 5.683956768425 11.243849977785  
 F 3.323421316725 3.866953549658 10.818712395098  
 F -3.419508776462 -3.308911403857 8.493281663274  
 F -5.657582212811 -4.843882506125 8.366750826943  
 F -7.967900895932 -3.823111680838 7.297493258973  
 F -8.022524257115 -1.251890456825 6.343856679716  
 F -5.788287820301 0.289157607928 6.448455558268  
 N 1.307360586327 1.436504821925 7.053537963721  
 N -0.235409538285 2.807097145689 8.794579325308  
 N -2.206023771459 1.357175620146 8.466591655771  
 N -0.938757330643 -0.317259580244 6.759420735047  
 Mn -0.382831156936 1.108941987109 7.923012244830  
 O 0.345366826932 -0.034084994106 9.409736878751  
 O -0.458170978455 -0.864639754998 9.936632939760

**BP86-Optimized <sup>5</sup>[(TPFC)Mn<sup>III</sup>(O<sub>2</sub>)]**

C 1.230726507297 -0.561719659023 5.565839635879  
 C -0.107598015412 -0.950299427201 5.840771346615  
 C -0.841402636113 -2.036267877291 5.238016293230  
 H -0.459615102187 -2.702527419360 4.455524320006  
 C -2.099960936759 -2.059970439484 5.813062067830  
 H -2.921813123402 -2.744931480112 5.573165181904  
 C -2.167919265529 -0.983458888887 6.770112367778  
 C -3.300196989669 -0.609842475651 7.548949956051  
 C -3.316214706119 0.549055066416 8.368790087092  
 C -4.344052383404 1.124601818114 9.202080705825  
 H -5.352198609152 0.716960954766 9.345665744732  
 C -3.820554611138 2.281264211358 9.790984182379  
 H -4.334932025717 2.963082528893 10.478922036449  
 C -2.473339657862 2.408374947690 9.327624607846  
 C -1.342602542467 3.264810285881 9.494034281363  
 C -0.995401142805 4.494569358580 10.133354492003  
 H -1.657473593582 5.109880389239 10.754414828577  
 C 0.334236317051 4.768960343362 9.789967028192  
 H 0.919637448265 5.646702221039 10.090453276843  
 C 0.804129546961 3.697928995071 8.945177408682  
 C 2.044573517328 3.488256420274 8.289092016960  
 C 2.265311426979 2.393288958877 7.407102615757  
 C 3.487400277128 2.082193419927 6.707725058652  
 H 4.423967049485 2.646334678500 6.789695416352  
 C 3.259856332440 0.956342522192 5.936580891366  
 H 3.979149190047 0.444430339344 5.286562110996  
 C 1.893440896594 0.548459100169 6.152689583758  
 C 1.998434070192 -1.382851430991 4.580148955836  
 C 2.395900323817 -2.704095448692 4.875066404679  
 C 3.116803709135 -3.485261892155 3.955644111222  
 C 3.455809821376 -2.943743119028 2.702873609361  
 C 3.073522183862 -1.629739666667 2.379129546091  
 C 2.353153701068 -0.868220066735 3.315215225886  
 C 3.144577099329 4.468820233150 8.516904013795  
 C 3.626966441664 5.293323510938 7.477091934573  
 C 4.650948801952 6.232197194508 7.687838948339  
 C 5.214833964306 6.366945919518 8.969080223798  
 C 4.754912298836 5.561833852117 10.026265153044  
 C 3.729915262741 4.629451807820 9.791636715243  
 C -4.526299798796 -1.455530081468 7.477286137614  
 C -4.531065256701 -2.784490539285 7.954327422370  
 C -5.681246150531 -3.589715301455 7.898444824889  
 C -6.868017000637 -3.066417771243 7.355005111822  
 C -6.895404477343 -1.746513653044 6.870941170413  
 C -5.732783158397 -0.959832398952 6.937185540091  
 F 2.095431337560 -3.245269929353 6.0660334938719  
 F 3.487055506626 -4.734376002056 4.265433572244  
 F 4.141015868610 -3.677416316769 1.820577202561

**BP86-Optimized <sup>7</sup>[(TPFC)Mn<sup>III</sup>(O<sub>2</sub>)]**

C 1.221156810658 -0.559212494248 5.512243278448  
 C -0.118632476002 -0.955418169420 5.787096620601  
 C -0.846987463415 -2.050746000743 5.189994088627  
 H -0.455486470852 -2.730186289274 4.423391854034  
 C -2.116736940203 -2.064292661492 5.743258613149  
 H -2.931602484828 -2.757321546142 5.501613566630  
 C -2.199649842467 -0.980094183650 6.692194959663  
 C -3.325895153631 -0.614367621985 7.480285579025  
 C -3.327954941225 0.518484769192 8.346248363857  
 C -4.331361527961 1.048697899317 9.237939613352  
 H -5.329383961753 0.623107302724 9.401242227877  
 C -3.799701844520 2.188791338770 9.858222262812  
 H -4.299223219761 2.830670437183 10.594184222644  
 C -2.472350506489 2.355185299457 9.355632856354  
 C -1.346751735995 3.226594534851 9.509426738305  
 C -0.977913339094 4.418682570841 10.205803739248  
 H -1.612514253854 4.989330279620 10.894884985263  
 C 0.339920875813 4.719108341087 9.831348939579  
 H 0.934320091864 5.577059309261 10.169652892247  
 C 0.782847789195 3.702351086631 8.907683589278  
 C 2.016988715594 3.513721276328 8.218858078752  
 C 2.241129166669 2.433785990675 7.320792154352  
 C 3.468491555662 2.116463194470 6.631046991865  
 H 4.405645394890 2.679755073245 6.715740104146  
 C 3.250823167845 0.975623134277 5.876257492375  
 H 3.980347261969 0.455346350086 5.244047836030  
 C 1.881341879578 0.565438112176 6.084040877653  
 C 1.998760324707 -1.392586571611 4.544468119768  
 C 2.396887858529 -2.709223298770 4.860173838773  
 C 3.127882435063 -3.503192071163 3.959728167364  
 C 3.481738294016 -2.979111862237 2.703872425299  
 C 3.101642483337 -1.670146054184 2.358651173872  
 C 2.368128815893 -0.897626051379 3.275587906669  
 C 3.118293699862 4.491520433467 8.456113756964  
 C 3.582108328459 5.345721803631 7.431971921723  
 C 4.609919644346 6.279362188900 7.649004186539  
 C 5.198141250865 6.379530095201 8.922218603812  
 C 4.758019650679 5.544659414172 9.964464849449  
 C 3.730362699218 4.617022661292 9.722204016389  
 C -4.560615806761 -1.447222473629 7.397046402858  
 C -4.582942927336 -2.784842636014 7.848597914357  
 C -5.742846029505 -3.575400976508 7.779389359606  
 C -6.925370099563 -3.026887280743 7.252315843976  
 C -6.937748843782 -1.696691981879 6.796957817124  
 C -5.764394273192 -0.926936133510 6.873915710567  
 F 2.086615183228 -3.236259678513 6.055860043508  
 F 3.496213453176 -4.748207828704 4.291442246885

F 4.178603199305 -3.724412404021 1.839235131447  
 F 3.432599138860 -1.173172909504 1.158969797581  
 F 2.010457300679 0.343814997928 2.908644004179  
 F 3.029582057809 5.291676448759 6.209215548699  
 F 5.023155549400 7.080558431816 6.657776139090  
 F 6.175376925846 7.265699019477 9.140886554778  
 F 5.325322813794 5.632479337134 11.175082615872  
 F 3.347276919479 3.823796148444 10.735949562892  
 F -3.477545591552 -3.335332619039 8.376353765397  
 F -5.733061619581 -4.839925980001 8.222209306507  
 F -8.035536129685 -3.769114105101 7.183279283929  
 F -8.061599242654 -1.176568284158 6.285454301665  
 F -5.807681078365 0.333395435137 6.411961013997  
 N 1.294623171092 1.465229230159 6.965968842927  
 N -0.261408771774 2.825236440461 8.741720791736  
 N -2.226868334089 1.333886480078 8.447422376331  
 N -0.963574022366 -0.322773131158 6.691515725586  
 Mn -0.489440254860 1.270889713396 7.650277592577  
 O 0.708713001236 -0.538210204961 10.551454814326  
 O 0.018940278499 -0.025095075899 11.412813998815

C -6.905646784975 -2.870351602034 7.997179096063  
 C 3.526437656777 4.064765332385 7.308002285729  
 C 4.464298337958 3.918196046937 8.340507876819  
 C 3.790339768006 5.060360599300 6.355662251165  
 C 5.605209821934 4.717455565562 8.428271037878  
 C 4.926037760656 5.869043363759 6.419448122783  
 C 5.836779714632 5.697997107748 7.462824551671  
 F 6.921186811790 6.464554224056 7.535645325326  
 F 6.477430608940 4.544348781825 9.420936656209  
 F 4.290769967459 2.980744901805 9.275629070622  
 F 5.140199343088 6.808633689755 5.498900399236  
 F 2.936886381708 5.267281772289 5.349758917443  
 F -5.557494086721 -0.435752682062 5.691651631508  
 F -7.789151134548 -1.905262561119 6.031598059738  
 F -8.010664565743 -3.591549265605 8.163483481335  
 F -5.962402130256 -3.799963088306 9.952046999349  
 F -3.716560838216 -2.354087864956 9.616583592007  
 F 2.726666789625 -2.169249363378 4.321378478097  
 F 3.512160404565 -3.521440960247 2.128441462832  
 F 2.166594893142 -3.221334585781 -0.224901275274  
 F 0.022408737549 -1.541177082359 -0.361739481740  
 F -0.765519057850 -0.169074864460 1.818613868896  
 O -1.537026511230 2.877582962944 5.679398271104  
 H -0.899757670965 3.543825654921 5.386393296908

**B. [(TPFC)Mn<sup>III</sup>(OH)(O<sub>2</sub>)<sup>-</sup>]**

**B3LYP-Optimized <sup>1</sup>[(TPFC)Mn<sup>III</sup>(OH)(O<sub>2</sub>)<sup>-</sup>]**

C 0.508229235882 -0.356998180339 4.363281179252  
 C -0.731258614534 -0.738744146195 4.942505283354  
 C -1.568000082412 -1.848107346456 4.546097862827  
 H -1.362611260523 -2.538068382923 3.730074077487  
 C -2.636501816528 -1.886738906917 5.408237985363  
 H -3.445828517647 -2.614478104337 5.410747137443  
 C -2.478022447058 -0.806409753490 6.352933613074  
 C -3.317556993995 -0.518920345881 7.457409706996  
 C -3.016850342473 0.482476751799 8.420361246788  
 C -3.651020957381 0.848347478262 9.661193814695  
 H -4.561400672293 0.410143155661 10.067127868242  
 C -2.874580601981 1.838722763214 10.255869174325  
 H -3.057594751846 2.325552558732 11.212749647870  
 C -1.775354161533 2.084786945631 9.377194215297  
 C -0.580099150524 2.870336840102 9.334431048200  
 C 0.115099101367 3.824973604840 10.138276978584  
 H -0.214698205024 4.224755141141 11.096160299194  
 C 1.295085226950 4.132965922957 9.466868639008  
 H 2.069175354002 4.820941153839 9.803261331174  
 C 1.323235212489 3.355053349845 8.254553955011  
 C 2.302673885477 3.217184487494 7.233147359250  
 C 2.180972840231 2.295362288569 6.164597459256  
 C 3.161057738192 2.028398175785 5.138711434211  
 H 4.126512655788 2.521590997231 5.042852324554  
 C 2.663803274951 1.032974171602 4.333778577189  
 C 3.152338301546 0.591251159048 3.467820039660  
 C 1.368938598867 0.659422371795 4.854954360529  
 N 1.109830175555 1.444664902373 5.950511718865  
 N 0.173226653118 2.628322304692 8.217264390644  
 N -1.911591723095 1.266311955514 8.288098280838  
 N -1.313267886429 -0.133969935583 6.027326112145  
 Mn -0.661110030336 1.553278596356 6.814466119909  
 C 0.952584870732 -1.112019424446 3.154135901299  
 C 2.048489527088 -1.986320884684 3.185302648234  
 C 0.284458070625 -0.987041947733 1.927342961573  
 C 2.467335941322 -2.696506538120 2.059002616694  
 C 0.679872577054 -1.689945066056 0.788251740582  
 C 1.778431293043 -2.547875920175 0.854615944123  
 C -4.551354195103 -1.334497181633 7.642818713627  
 C -4.702228410917 -2.211518333580 8.726938750858  
 C -5.624184495497 -1.256830179779 6.742401667184  
 C -5.857837264962 -2.971810532307 8.913084313696  
 C -6.788064175395 -2.009598828860 6.905095636539

**B3LYP-Optimized <sup>3</sup>[(TPFC)Mn<sup>III</sup>(OH)(O<sub>2</sub>)<sup>-</sup>]**

C 1.190239121308 -0.508165659651 5.470605855977  
 C -0.144716958686 -0.906970966140 5.742943663264  
 C -0.834139286759 -2.061272746245 5.212922132586  
 H -0.422296246556 -2.779907593022 4.507382463719  
 C -2.092837503107 -2.076734155516 5.760946590752  
 H -2.874389666053 -2.810619529151 5.574210400705  
 C -2.204198340970 -0.935252937330 6.638516194274  
 C -3.324746456865 -0.574879030632 7.426326933712  
 C -3.345512888916 0.572083981990 8.266643716806  
 C -4.288193428487 1.010789585484 9.262941028512  
 H -5.231930117876 0.524274082515 9.505341173030  
 C -3.753951638843 2.137740374360 9.881911651038  
 H -4.198442623311 2.708765953646 10.695854682491  
 C -2.490121300071 2.386802055350 9.265448144734  
 C -1.363545746953 3.254387842428 9.426137354083  
 C -0.951649275147 4.346619358183 10.250532314417  
 H -1.547203417621 4.834627375324 11.020807239211  
 C 0.356433865119 4.652997896897 9.887563637510  
 H 0.982899030349 5.430360460844 10.322136391281  
 C 0.746385406725 3.735666028027 8.846827256767  
 C 1.979725862748 3.533560798764 8.170142634470  
 C 2.196473155732 2.471260131731 7.257958609781  
 C 3.448879808853 2.114490691377 6.637241970756  
 H 4.394395171665 2.632865684213 6.774295961322  
 C 3.234530332239 0.980302058697 5.887675365874  
 H 3.975803376449 0.427754815614 5.313781284976  
 C 1.842247957020 0.623172404856 6.030153172051  
 C 1.989654902179 -1.362798501343 4.543881647417  
 C 2.379750583816 -2.665571442070 4.886803075605  
 C 3.127033958045 -3.470704440842 4.025715643507  
 C 3.513440359700 -2.974920848739 2.779881295375  
 C 3.147199375122 -1.680950443857 2.407257860082  
 C 2.395448674348 -0.897687059591 3.284349742337  
 C 3.111345834981 4.457793613908 8.465145336946  
 C 3.614656837881 5.333038475168 7.491174830146  
 C 4.667229871455 6.211337519465 7.752717434800  
 C 5.246754533739 6.234580650897 9.021975973074  
 C 4.771018816283 5.377108369717 10.014750361310  
 C 3.719260554877 4.505317208459 9.728168531483  
 C -4.528471313410 -1.451815469860 7.412849852924  
 C -4.495935977614 -2.769930369597 7.892826010321  
 C -5.624522529887 -3.590941003278 7.890282079606

C -6.836795735018 -3.096710249116 7.407215614951  
 C -6.907454731105 -1.787736799188 6.928783546198  
 C -5.764425227228 -0.987111924308 6.937827809870  
 F 2.044162228067 -3.173840315844 6.075491273181  
 F 3.481909731517 -4.703370733695 4.388524759337  
 F 4.227748244278 -3.732013941158 1.951536922509  
 F 3.509597158780 -1.205755061927 1.215720829047  
 F 2.057052747327 0.330753775503 2.884561898653  
 F 3.079579128997 5.352022537320 6.268078537688  
 F 5.115045930920 7.032527694457 6.803417298870  
 F 6.249197038108 7.068552794630 9.283515701421  
 F 5.328762466681 5.389097231094 11.225110864597  
 F 3.307586501935 3.689452350965 10.701916465747  
 F -3.363071098658 -3.277066030964 8.385502486596  
 F -5.555180286942 -4.836968700715 8.358125068880  
 F -7.919187130131 -3.869517533318 7.402287480922  
 F -8.061392987703 -1.314131639604 6.459431846878  
 F -5.872701589151 0.253467225360 6.456019262831  
 N 1.249512661640 1.546051987276 6.854207015973  
 N -0.324988791342 2.934659284555 8.595240760766  
 N -2.299094326219 1.441828729672 8.292422908353  
 N -1.002332312733 -0.250830896734 6.589727092941  
 Mn -0.685547775186 1.602357843606 7.208223671256  
 O 0.364929279481 0.026480835827 10.280768004131  
 O -0.448960294491 0.283361352589 11.124564074695  
 O -1.293868659152 2.623788562954 5.659045937298  
 H -2.205830846176 2.384278399713 5.441919367379

**B3LYP-Optimized <sup>5</sup>[(TPFC)Mn<sup>III</sup>(OH)(O<sub>2</sub>)]-**

C 1.226006601988 -0.557762770618 5.572457119180  
 C -0.107898884924 -0.960665841081 5.847647705475  
 C -0.826872724054 -2.069745658667 5.262189146745  
 H -0.433226581041 -2.756745925841 4.515957539948  
 C -2.088495993858 -2.080243215439 5.805151037993  
 H -2.890269533239 -2.778755183305 5.574115020123  
 C -2.177165439963 -0.982479465826 6.739236084618  
 C -3.298951199509 -0.605545232877 7.515506653894  
 C -3.306147953711 0.530942067384 8.370778872890  
 C -4.293640714723 1.040527264436 9.285849510085  
 H -5.274459026545 0.604676707157 9.469250062039  
 C -3.764449784255 2.173472824416 9.900207199956  
 H -4.248371365364 2.794676754310 10.652197480059  
 C -2.454283186520 2.359847270121 9.368003833360  
 C -1.330956241928 3.231407433552 9.520983959723  
 C -0.957698333174 4.208519456038 10.239067108808  
 H -1.581662670500 4.961338078294 10.939563350334  
 C 0.350684965058 4.708065103742 9.869895603604  
 H 0.946153670082 5.547975637870 10.224080435668  
 C 0.782860250817 3.707440574827 8.926475848392  
 C 2.013062990440 3.512603351834 8.238953947000  
 C 2.239574327238 2.437808329026 7.345794868736  
 C 3.469429817132 2.113911571536 6.664324304385  
 H 4.401474793376 2.669467234362 6.747122234544  
 C 3.254448362806 0.976076514857 5.924045492189  
 H 3.982252678190 0.454845277070 5.305615148960  
 C 1.883082112830 0.571818155313 6.129630416634  
 C 2.006455348214 -1.394378548197 4.613511848412  
 C 2.395035240649 -2.705136353719 4.926462658041  
 C 3.122143693895 -3.498345206482 4.037564702856  
 C 3.486419216267 -2.982620749377 2.793061837298  
 C 3.118718762163 -1.681044981135 2.449321625277  
 C 2.387645804398 -0.909558638207 3.353917721819  
 C 3.114997384798 4.486280955532 8.478396170699  
 C 3.585667570604 5.331637297884 7.462412989441  
 C 4.608663498056 6.255876051226 7.679089340194  
 C 5.188515236017 6.359340523912 8.944233401339  
 C 4.743004031398 5.535223193355 9.978542245699  
 C 3.721044042142 4.615954907226 9.736891650345

C -4.531280075245 -1.438469350327 7.445743929256  
 C -4.552867414958 -2.767896693175 7.894091840726  
 C -5.705579189549 -3.552702038353 7.838515954510  
 C -6.886347382288 -3.009949873223 7.330027143078  
 C -6.902042874231 -1.689289397409 6.879458538699  
 C -5.735930604848 -0.925220887530 6.941608779803  
 F 2.076525631557 -3.232072292534 6.111253755279  
 F 3.477517507687 -4.738551637032 4.371801513151  
 F 4.181106812775 -3.728174047081 1.938511721639  
 F 3.459154974943 -1.187542954715 1.259073993082  
 F 2.045554294225 0.326266323765 2.981538872518  
 F 3.046314222744 5.277385895925 6.242415316591  
 F 5.026283739785 7.046182241117 6.690987055488  
 F 6.162279508140 7.237958093430 9.162638965878  
 F 5.300753571261 5.624292501434 11.185289966003  
 F 3.335902730204 3.835484576908 10.749218912645  
 F -3.450754684678 -3.320949989134 8.405625860695  
 F -5.688861003613 -4.810376495935 8.278238063752  
 F -7.991035387161 -3.747880172601 7.274386333517  
 F -8.025099263888 -1.170030923450 6.384917521732  
 F -5.790242635829 0.327828794962 6.483812742939  
 N 1.313024311617 1.474097860449 6.990697616527  
 N -0.261026079402 2.855352448399 8.756241745068  
 N -2.232626169797 1.361732240346 8.454254210791  
 N -0.953602730939 -0.341937881201 6.729970784181  
 Mn -0.528024560908 1.352332202615 7.573066825709  
 O 0.268421496322 0.248966585547 9.147456689071  
 O -0.456411003500 -0.644628382752 9.714112489844  
 O -1.122438302677 2.355334912201 6.133242047876  
 H -2.083206202999 2.254955574844 6.058508633190

**B3LYP-Optimized <sup>7</sup>[(TPFC)Mn<sup>III</sup>(OH)(O<sub>2</sub>)]-**

C 1.215229079678 -0.475667696043 5.478330667892  
 C -0.119179377397 -0.8736444814549 5.754250082899  
 C -0.806829615832 -2.034489125916 5.236203092598  
 H -0.394532605596 -2.758616164824 4.536576279767  
 C -2.064007148631 -2.048223754659 5.787660376452  
 H -2.844205307977 -2.785931174537 5.610370118721  
 C -2.176060077742 -0.898778161215 6.654660744606  
 C -3.294622324708 -0.536340647454 7.443537978334  
 C -3.316748645610 0.615762629226 8.276247939604  
 C -4.255055035688 1.053350190640 9.276944504751  
 H -5.196210059462 0.564709385793 9.525031332451  
 C -3.720143257470 2.182267022446 9.89184715597  
 H -4.161191719174 2.752874825063 10.707953109688  
 C -2.459973604660 2.432908836893 9.268966327591  
 C -1.332276642332 3.299425277950 9.426465908995  
 C -0.921023989194 4.398385673576 10.242054503206  
 H -1.516501858719 4.891500238280 11.009131964424  
 C 0.385893074457 4.704599240695 9.874592549768  
 H 1.011422725910 5.486655684390 10.302039676864  
 C 0.775803889570 3.780413020612 8.840063752710  
 C 2.007478291881 3.577103554034 8.160695905534  
 C 2.222644978029 2.511217255276 7.252384904735  
 C 3.473700846763 2.150520142258 6.629626992559  
 H 4.418970217242 2.673483356692 6.762226925258  
 C 3.258613877214 1.016274414251 5.884994553122  
 H 3.998885102549 0.462423972162 5.311072037671  
 C 1.867169890622 0.658119943949 6.032576861355  
 C 2.014483959774 -1.334876987807 4.555610527077  
 C 2.408084668006 -2.634441470865 4.906496547476  
 C 3.155281113238 -3.443754344364 4.049269331376  
 C 3.538090495977 -2.95546717879 7.799370047948  
 C 3.168318804156 -1.664813302098 2.418837627048  
 C 2.416725723610 -0.877279972867 3.292239132788  
 C 3.137891083679 4.505480800397 8.446905972982  
 C 3.637006032018 5.375765114689 7.466315803225  
 C 4.688035633563 6.258178538741 7.720046591645

C 5.270308395043 6.290755072901 8.987839676146  
 C 4.798745974657 5.438480517174 9.987056071315  
 C 3.748438527848 4.562440808076 9.708280560787  
 C -4.491105935819 -1.423126996351 7.449490106303  
 C -4.445188457281 -2.731708753710 7.954043230319  
 C -5.567765638766 -3.560854785445 7.973150275016  
 C -6.786466710203 -3.084913187486 7.487848568368  
 C -6.869985626604 -1.785713738291 6.985512632068  
 C -5.733069000551 -0.976471415308 6.973467104928  
 F 2.075841934855 -3.135437751943 6.099203984338  
 F 3.513445159429 -4.673248760779 4.419526476877  
 F 4.252278133514 -3.716584555134 1.974618364285  
 F 3.527388784273 -1.196778287452 1.223469816222  
 F 2.075152285585 0.347873523272 2.885169048529  
 F 3.099088801342 5.386023268173 6.244363877666  
 F 5.131763702370 7.423126996351 6.764653068692  
 F 6.271331167005 7.128731040598 9.241908721796  
 F 5.359103584845 5.459398356065 11.196081805480  
 F 3.340682127104 3.751852480936 10.688055106106  
 F -3.306159294458 -3.221516502751 8.449203397401  
 F -5.486526546640 -4.797495372261 8.463612604575  
 F -7.862859827628 -3.865978597619 7.503370819689  
 F -8.030234375807 -1.329516355163 6.514395187265  
 F -5.853469527246 0.254743666182 6.470824284235  
 N 1.275497006232 1.582902435712 6.855550991516  
 N -0.293421234038 2.973585652089 8.597795708132  
 N -2.272810533462 1.488194551229 8.294266849137  
 N -0.976759161671 -0.211099002515 6.595960260195  
 Mn -0.660123389490 1.644902682184 7.207298497040  
 O -0.620995434924 -0.646786242899 10.389441041368  
 O -1.463289805770 -1.494572435474 10.274440132891  
 O -1.263262099804 2.670922061270 5.659253585933  
 H -2.188487201682 2.466595557709 5.463464296666

C 3.105787351862 4.475412985194 8.461367879530  
 C 3.604547585123 5.328003052917 7.463903264952  
 C 4.652185109814 6.219787227156 7.701507611439  
 C 5.231412496915 6.280611954251 8.970621195518  
 C 4.760391325828 5.447189708983 9.986973621255  
 C 3.713322209522 4.561608486103 9.723531612982  
 C -4.511351846046 -1.419064164347 7.433186270700  
 C -4.478716083362 -2.738140117355 7.912638314543  
 C -5.605754156071 -3.562209696837 7.903104289493  
 C -6.816762001412 -3.069514895498 7.412744138836  
 C -6.887790717095 -1.759845699669 6.933989227812  
 C -5.745899307210 -0.956523404494 6.950917829474  
 F 2.027327739996 -3.173908016338 6.131208593761  
 F 3.467639438998 -4.723548014518 4.457706329333  
 F 4.239532907018 -3.764473014665 2.021327926784  
 F 3.546622888861 -1.233147058619 1.270392186645  
 F 2.090854640328 0.322256672350 2.926342546214  
 F 3.066188553912 5.312929145670 6.239747972624  
 F 5.095069636054 7.020438289045 6.729582176939  
 F 6.230355825895 7.128754921874 9.209963430327  
 F 5.319603519264 5.494557127999 11.198146176240  
 F 3.306982382187 3.766794059830 10.719577979441  
 F -3.345588436885 -3.242301869415 8.413199073613  
 F -5.537205400319 -4.810063895434 8.372176008603  
 F -7.899152031570 -3.845886308199 7.401051850397  
 F -8.041674456506 -1.288268367275 6.456505490208  
 F -5.853023917842 0.285844835125 6.467343902070  
 N 1.246929921878 1.530576276012 6.906999639904  
 N -0.302782926717 2.911082517630 8.658064626579  
 N -2.269035444586 1.449531021621 8.343014071925  
 N -0.984193917598 -0.217541546303 6.6197344665794  
 Mn -0.643440909027 1.558065368774 7.332083701125  
 O 0.169376041654 -0.139274741372 9.497965054957  
 O -0.532070409440 -1.046010534035 9.87886906758  
 O -1.269719876823 2.584870445075 5.989839528356  
 H -2.240382101501 2.577026981109 6.054884280058

**TPSSh-Optimized  $^1[(\text{TPFC})\text{Mn}^{\text{III}}(\text{OH})(\text{O}_2)]^-$**

C 1.201374997165 -0.506394192838 5.509571562825  
 C -0.135835588002 -0.895096329543 5.774039692227  
 C -0.829808397759 -2.042004599724 5.239811330917  
 H -0.422766181894 -2.761116012874 4.531149727615  
 C -2.090431949530 -2.044807971255 5.788190675590  
 H -2.881402060707 -2.769249370274 5.601321000828  
 C -2.187688371279 -0.901949266680 6.664000058002  
 C -3.309373519099 -0.541582045222 7.456458069596  
 C -3.336003451461 0.600501327141 8.298391102887  
 C -4.302129672220 1.061315666175 9.261507766034  
 H -5.263193754531 0.596201223705 9.477462217300  
 C -3.767935944501 2.188976188879 9.880541236020  
 H -4.227639228402 2.776191942705 10.674371509569  
 C -2.483092584216 2.412002469330 9.296007550225  
 C -1.350505362025 3.271975955241 9.461902456957  
 C -0.953105372905 4.402077108058 10.243547290294  
 H -1.558656151553 4.920736406162 10.985644037988  
 C 0.355651817008 4.703580038140 9.877725325884  
 H 0.971881971251 5.507582015907 10.277969985354  
 C 0.755119922445 3.743322637220 8.879915152230  
 C 1.979853810369 3.538233952859 8.194722849668  
 C 2.195693881801 2.467861451228 7.287170863497  
 C 3.446767819611 2.125036930288 6.657489065957  
 H 4.386389397567 2.660499495698 6.784058634532  
 C 3.238887794375 0.989230208020 5.909692945337  
 H 3.978391639295 0.446920142852 5.322974018891  
 C 1.854065071821 0.620852534747 6.070780257386  
 C 1.999905405861 -1.367782309423 4.590477259002  
 C 2.376180709864 -2.673305379838 4.940889914506  
 C 3.124152757755 -3.487554069956 4.088052116470  
 C 3.523985032168 -2.997935497192 2.843063651093  
 C 3.171060178908 -1.701544067754 2.462767219398  
 C 2.418873747718 -0.909194304126 3.332318280735

**TPSSh-Optimized  $^3[(\text{TPFC})\text{Mn}^{\text{III}}(\text{OH})(\text{O}_2)]^- (\text{O}_2\text{-bound state})$**

C 1.221352528910 -0.551299771299 5.572010784890  
 C -0.113751340518 -0.955455047488 5.842569573877  
 C -0.829926374719 -2.064061895817 5.256662361845  
 H -0.434105023745 -2.748289330945 4.508623852053  
 C -2.091685520601 -2.078121737558 5.804122436112  
 H -2.894691121630 -2.776602199408 5.576189082260  
 C -2.178025785490 -0.982182627009 6.738374465770  
 C -3.297739732472 -0.604718428182 7.519965368717  
 C -3.304359693803 0.534335961016 8.370738197675  
 C -4.293161888084 1.046143956843 9.282026050644  
 H -5.273375874798 0.608527364540 9.465015033080  
 C -3.766591791448 2.182614065930 9.892217004666  
 H -4.251773024771 2.807004280134 10.640334243507  
 C -2.455861496587 2.367890531881 9.361799986740  
 C -1.333518505885 3.239137325215 9.514184875865  
 C -0.962599117830 4.420904344682 10.226297448177  
 H -1.589131003170 4.977215022293 10.921289777943  
 C 0.346269343827 4.718145487846 9.858263307747  
 H 0.942340185238 5.559910767059 10.207304442107  
 C 0.780410956625 3.711108306524 8.922862371152  
 C 2.012200039054 3.515160089225 8.239454463513  
 C 2.241030199026 2.438659085238 7.346565998836  
 C 3.471714794535 2.111574148843 6.671092786884  
 H 4.404587702558 2.665368594216 6.759004448339  
 C 3.254400444758 0.973394581465 5.928633652660  
 H 3.980357073779 0.447338826401 5.311635472299  
 C 1.882131220204 0.576176961977 6.130472468070  
 C 2.001495222223 -1.386944437933 4.615305867923  
 C 2.373630772094 -2.705176830692 4.921264549854  
 C 3.101095570942 -3.499273815868 4.032593531255

C 3.482982308519 -2.976430424413 2.795411576595  
 C 3.132800654028 -1.667322771130 2.458429164392  
 C 2.400452444382 -0.895560954896 3.3625966833681  
 C 3.114403932511 4.484495064481 8.480318938946  
 C 3.605447146084 5.313336692979 7.458785513353  
 C 4.631944402629 6.234216601736 7.676610761615  
 C 5.194455693907 6.352155903006 8.949235391507  
 C 4.728851462929 5.545521266450 9.989615680212  
 C 3.704405198997 4.628755229713 9.746085891661  
 C -4.525661870636 -1.440468047288 7.455149967211  
 C -4.537379113852 -2.775370468769 7.890951858420  
 C -5.687260480967 -3.565464519190 7.838278833752  
 C -6.875771167945 -3.022530014680 7.345902201162  
 C -6.902208349136 -1.696731224719 6.908401938224  
 C -5.738386784319 -0.927960308303 6.966904753927  
 F 2.039704393641 -3.237214910135 6.101834519733  
 F 3.442053665163 -4.747369838256 4.360557161837  
 F 4.179078192841 -3.723387794814 1.940107893986  
 F 3.489849407482 -1.167860891313 1.273282137490  
 F 2.071579741721 0.347893370369 2.996623910272  
 F 3.079240402171 5.247219948381 6.231380274913  
 F 5.068408699068 7.010187710650 6.682536939886  
 F 6.172242228124 7.229015417193 9.169210786184  
 F 5.272108286508 5.647642664311 11.204208242096  
 F 3.301439511162 3.861297187702 10.764196497488  
 F -3.426671431148 -3.327468342892 8.390222848655  
 F -5.661424611419 -4.828852913043 8.267298980849  
 F -7.979225095246 -3.766240841219 7.293213160903  
 F -8.033787936528 -1.177892061041 6.427478481251  
 F -5.801241577147 0.330319873931 6.518566034007  
 N 1.310368775622 1.480250650008 6.991463581718  
 N -0.261948558552 2.854358556905 8.753161721037  
 N -2.227781650314 1.365637650504 8.450564782967  
 N -0.959139065142 -0.335774845876 6.726629818352  
 Mn -0.522493870959 1.342959772766 7.581342712353  
 O 0.232351825180 0.246252576765 9.109304561954  
 O -0.477388317461 -0.699490905076 9.598768719491  
 O -1.112490936786 2.352933874621 6.139634979554  
 H -2.078372313331 2.255660485449 6.083072193907

**TPSSh-Optimized <sup>3</sup>[(TPFC)Mn<sup>III</sup>(OH)(O<sub>2</sub>)]<sup>-</sup> (unbound state)**

C 1.193845369015 -0.501568498210 5.484785363778  
 C -0.141558068073 -0.900188144430 5.755899603090  
 C -0.833104633111 -2.046720297489 5.218104614552  
 H -0.421921342940 -2.759114694363 4.505460659651  
 C -2.092676844145 -2.062728593258 5.768795557059  
 H -2.879400528958 -2.790519364258 5.578719199042  
 C -2.197511642962 -0.929027944438 6.653807094136  
 C -3.317726387246 -0.567704976087 7.443259175488  
 C -3.335922384084 0.577869723188 8.283960213424  
 C -4.285000850394 1.025805875387 9.268424418155  
 H -5.233372614193 0.544164535248 9.502604455399  
 C -3.752457652791 2.154758741251 9.885490616539  
 H -4.202448713753 2.734461839968 10.689787637279  
 C -2.481719109789 2.394237922777 9.280686203617  
 C -1.357555801526 3.263011080301 9.437439086949  
 C -0.952418424764 4.3711176657173 10.242783160355  
 H -1.552404174991 4.869316603344 11.002611929212  
 C 0.354280917608 4.678314769039 9.874980752644  
 H 0.977218184228 5.466959830294 10.294192718841  
 C 0.749687976961 3.746166305940 8.851133127301  
 C 1.982194808651 3.545033423637 8.174012499968  
 C 2.200435960105 2.478337420020 7.266031047618  
 C 3.451666304139 2.119733460800 6.646670956031  
 H 4.395635788453 2.644270676006 6.783817734664  
 C 3.237269116243 0.985456648391 5.898656282679  
 H 3.976494782562 0.429987107573 5.324461955089  
 C 1.847114795857 0.629448639044 6.043183873708

C 1.991497787242 -1.355341586210 4.559726387459  
 C 2.361583124890 -2.667214315817 4.894645081087  
 C 3.108736329118 -3.473995825920 4.034173200286  
 C 3.516106441563 -2.970340754566 2.797216264127  
 C 3.170952908048 -1.667372306744 2.432446333428  
 C 2.418216047933 -0.883037449303 3.308605465185  
 C 3.110777076352 4.472395222464 8.458164547251  
 C 3.626598918565 5.324320861735 7.468518517949  
 C 4.679835052894 6.205713689693 7.719655055352  
 C 5.247268299107 6.256496049515 8.994530891968  
 C 4.759299718870 5.423375759674 10.003228601457  
 C 3.707564759903 4.547596959470 9.726388400775  
 C -4.520632704131 -1.441678858483 7.425673470442  
 C -4.485615388743 -2.767233242574 7.887850124659  
 C -5.614899964963 -3.588159009747 7.881852972183  
 C -6.830839463961 -3.086072519805 7.413756118059  
 C -6.904708436233 -1.769790899416 6.953574373988  
 C -5.760615865671 -0.969786970673 6.965480691648  
 F 2.007704114648 -3.181101116786 6.077818277268  
 F 3.445895310900 -4.715802793147 4.389785621299  
 F 4.231501253951 -3.729533633690 1.968640271796  
 F 3.553028425661 -1.185646791070 1.247518523671  
 F 2.096454475673 0.354403484205 2.916310728173  
 F 3.099792364185 5.318184708549 6.239530727379  
 F 5.139073992961 7.005857357546 6.755219656911  
 F 6.251219555024 7.094612912014 9.246702641181  
 F 5.307727738099 5.460716851217 11.219455358860  
 F 3.285507218322 3.751531701615 10.714687255129  
 F -3.348294612864 -3.280341802800 8.369311046961  
 F -5.543618303483 -4.841861779278 8.334165260210  
 F -7.915185339820 -3.859437518587 7.405775484529  
 F -8.063187713331 -1.289324630808 6.497039081255  
 F -5.870134570766 0.278675076004 6.498962087062  
 N 1.251541408427 1.551743555188 6.869041693163  
 N -0.315583990964 2.929837961022 8.611830851117  
 N -2.280444785770 1.440036059035 8.315369297632  
 N -0.994518144209 -0.245356293890 6.611219955427  
 Mn -0.669125550972 1.588586293995 7.247449079149  
 O 0.303001346874 -0.125836383310 10.107811201685  
 O -0.619981025612 -0.243235164831 10.876023401221  
 O -1.282851255670 2.599497696932 5.712821759809  
 H -2.191037382151 2.332182700739 5.496478305540

**TPSSh-Optimized <sup>5</sup>[(TPFC)Mn<sup>III</sup>(OH)(O<sub>2</sub>)]<sup>-</sup>**

C 1.220287911605 -0.548745355640 5.565578068343  
 C -0.113986275252 -0.951369195621 5.838475536090  
 C -0.829639208637 -2.061720277867 5.256460357353  
 H -0.433597822126 -2.747920064014 4.510404693827  
 C -2.090866501897 -2.074312273594 5.804527394995  
 H -2.893972193630 -2.773573840047 5.579533413915  
 C -2.177153871253 -0.975860459202 6.735234743300  
 C -3.298111000962 -0.600001874302 7.514801099443  
 C -3.307979304895 0.541326806702 8.361726630739  
 C -4.292635545291 1.045652002620 9.281352838228  
 H -5.268765070791 0.601901076662 9.471178509853  
 C -3.767021037472 2.183274473384 9.890206312220  
 H -4.248649734190 2.803050803644 10.644393514317  
 C -2.461656351141 2.375896878052 9.349564929552  
 C -1.338908445777 3.246175225599 9.502423484536  
 C -0.964426751671 4.420829474869 10.222543876059  
 H -1.589115174871 4.973860870204 10.921749369619  
 C 0.345980240201 4.716557017426 9.856773253858  
 H 0.944800524032 5.553679126008 10.212116279108  
 C 0.776843350672 3.715532993905 8.914972031343  
 C 2.009555210785 3.516610732619 8.234835775643  
 C 2.236111817115 2.440482638534 7.342144905631  
 C 3.467981459174 2.111213367542 6.671415765425  
 H 4.401523083974 2.663100952586 6.763666048322



C 3.251515941223 0.973588403380 5.927988782260  
H 3.978894716006 0.445538461949 5.314427850381  
C 1.878447322535 0.578900811109 6.124272940104  
C 2.001265810391 -1.385408664349 4.610722293075  
C 2.372701328046 -2.703484227786 4.918276279751  
C 3.101125283397 -3.498383855568 4.031127738264  
C 3.484807392152 -2.976473159842 2.794094492057  
C 3.135503991774 -1.667493092117 2.455686334970  
C 2.402168721866 -0.894873540897 3.358305902444  
C 3.115178647368 4.480883508241 8.480755870245  
C 3.609564093829 5.312306499941 7.463034332194  
C 4.639214571587 6.228557702085 7.685448419627  
C 5.201561373630 6.338630168493 8.958861514665  
C 4.732694999190 5.529006563796 9.995463529327  
C 3.704985531126 4.617096906903 9.747431408331  
C -4.522630829324 -1.440945155376 7.454904268820  
C -4.528173883206 -2.774733549611 7.894284298650  
C -5.675361555838 -3.569044857953 7.846894055166  
C -6.867234639714 -3.031624067198 7.356560806485  
C -6.899786700434 -1.707040357890 6.915784771577  
C -5.738653637816 -0.933870981944 6.969179001552  
F 2.037139605505 -3.234436814441 6.098820417849  
F 3.441340745772 -4.746282113673 4.360407718465  
F 4.181821778062 -3.724204629205 1.940277890802  
F 3.494400499718 -1.168966885392 1.270749690635  
F 2.074306913877 0.348512802914 2.991287756261  
F 3.083976824600 5.252790192151 6.235082028638  
F 5.079070575995 7.007239220640 6.695065530797  
F 6.182374069638 7.210918259157 9.183191802570  
F 5.275784974559 5.623770350053 11.210659304720  
F 3.298435273243 3.846650015602 10.761777124166  
F -3.414131147359 -3.321467097716 8.391857831250  
F -5.643779172256 -4.831170377534 8.279090483020  
F -7.968067453512 -3.779454718154 7.308916850170  
F -8.034610735561 -1.193491346569 6.436962515511  
F -5.807299236908 0.323140767558 6.518252927394  
N 1.302871227354 1.483822909732 6.982891179822  
N -0.269139047193 2.864350176874 8.736457248163  
N -2.236740886217 1.379260957869 8.432361099740  
N -0.957704749591 -0.328024131329 6.721989626793  
Mn -0.533466972416 1.362906897290 7.559213436036  
O 0.225888720826 0.273523630537 9.130342354072  
O -0.508636442064 -0.650938426158 9.644245246006  
O -1.128135560518 2.358578960200 6.120608201696  
H -2.091833591041 2.245398784155 6.054115213763

**TPSSh-Optimized <sup>7</sup>[(TPFC)Mn<sup>III</sup>(OH)(O<sub>2</sub>)]-**

C 1.206331454449 -0.473811619160 5.488447613681  
C -0.128756256448 -0.871625110523 5.762065785005  
C -0.817901412546 -2.024524825329 5.234594149604  
H -0.405409628160 -2.742549266140 4.528380591725  
C -2.076917091069 -2.038387041777 5.786377847195  
H -2.862146918053 -2.769775109439 5.603939944644  
C -2.183343290054 -0.896766562374 6.661133395123  
C -3.303268240617 -0.532853713354 7.449605981474  
C -3.323256643846 0.617980512575 8.282965549657  
C -4.267642310938 1.063150914120 9.273095748839  
H -5.212677194237 0.578184513428 9.513906837986  
C -3.734279639194 2.193535295954 9.886963785537  
H -4.180260211650 2.771436689316 10.694805113559  
C -2.467975399158 2.436216198263 9.274140988328  
C -1.342359327485 3.303747734719 9.429282662442  
C -0.936462847918 4.413541024264 10.232030304000  
H -1.536075190300 4.913868002575 10.990740404496  
C 0.370123380573 4.719519353618 9.862816264986  
H 0.993570312214 5.508790619036 10.280111140877  
C 0.764615400059 3.784625423920 8.841225428179  
C 1.996535103193 3.581441856738 8.163721782245

C 2.213624744630 2.512134804309 7.258334157804  
C 3.465326888143 2.149667368185 6.642153377452  
H 4.409903445741 2.673177267833 6.779129118346  
C 3.250380887870 1.012935486686 5.898087735289  
H 3.989681478783 0.453883498238 5.327453720493  
C 1.859495617953 0.659560624295 6.042202490703  
C 2.004906012364 -1.332281710939 4.568483483333  
C 2.376801929941 -2.641661427938 4.911014563921  
C 3.124964022890 -3.452481878939 4.055226451324  
C 3.531800365766 -2.955468859577 2.815419188337  
C 3.185044372247 -1.655052954130 2.443155794014  
C 2.431291561583 -0.866637942998 3.314757345744  
C 3.125752705664 4.508925819685 8.444743192496  
C 3.642650150403 5.356709633801 7.452059301206  
C 4.696464029107 6.238241360642 7.700220877086  
C 5.263573060318 6.29342036553 8.8975051241134  
C 4.774608780924 5.464502440165 9.986710774399  
C 3.722330772786 4.588462146072 9.712822201594  
C -4.501055598827 -1.413933826529 7.446189090098  
C -4.456791600181 -2.733407052148 7.924997309769  
C -5.581978861175 -3.560021993252 7.934160677302  
C -6.802672607673 -3.070094559049 7.465586113297  
C -6.885575403167 -1.760077068927 6.989432945636  
C -5.745622168391 -0.954112971371 6.986367403188  
F 2.023687391190 -3.149187190661 6.097193327794  
F 3.463644603390 -4.691824344377 4.418005296575  
F 4.248170457722 -3.718544230320 1.991231242135  
F 3.566744053068 -1.179606308204 1.255549554153  
F 2.108279013731 0.368237926919 2.915448326832  
F 3.116185108553 5.346568415514 6.222942842285  
F 5.156565037321 7.034458939352 6.732924636644  
F 6.268088065553 7.131744211653 9.224367389129  
F 5.322735261316 5.505917366385 11.202961136909  
F 3.299596111167 3.796319263794 10.704007588875  
F -3.315094738486 -3.235196896603 8.407491430893  
F -5.502244510410 -4.807698916583 8.401632111405  
F -7.882974946562 -3.849201994354 7.472067020353  
F -8.048719066962 -1.291213964520 6.532592270136  
F -5.863866082951 0.288228121607 6.505745946825  
N 1.263620950507 1.585567051168 6.863735632386  
N -0.300443822986 2.966655016067 8.604988594738  
N -2.270582264823 1.483627207790 8.306310605354  
N -0.982580960037 -0.210157253147 6.611472144236  
Mn -0.661096245307 1.633692580065 7.230445212633  
O -0.286847037449 -0.773117259790 10.348448392296  
O -1.127403665401 -1.632369846623 10.284641775257  
O -1.270052758235 2.647107930089 5.687884083292  
H -2.184504590423 2.397063043684 5.478017565319

**BP86-Optimized <sup>1</sup>[(TPFC)Mn<sup>III</sup>(OH)(O<sub>2</sub>)]-**

C 1.237662213167 -0.560207127789 5.562231204466  
C -0.104949496529 -0.967329014379 5.841349781034  
C -0.833872621918 -2.071712462596 5.240785090855  
H -0.449243570493 -2.752467600513 4.471101339382  
C -2.097655126123 -2.081340809252 5.805032586255  
H -2.917395811006 -2.772837336903 5.573400374184  
C -2.160560942618 -0.982571433490 6.753014500955  
C -3.297745061298 -0.595869292314 7.533894060189  
C -3.327645103370 0.565750366063 8.364924043894  
C -4.342197948485 1.097524576611 9.257514351300  
H -5.336284590085 0.665779783816 9.431451417090  
C -3.814619841452 2.242843078286 9.864683019736  
H -4.313556596989 2.885837650896 10.600920857934  
C -2.480522465156 2.409332072459 9.350685770922  
C -1.345891621960 3.277077730110 9.514277575974  
C -0.973694947383 4.468903664036 10.219524830111  
H -1.610284268072 5.047495883273 10.901190422790  
C 0.353069141124 4.756227633071 9.864673118936

|    |                 |                 |                 |    |                 |                 |                 |
|----|-----------------|-----------------|-----------------|----|-----------------|-----------------|-----------------|
| H  | 0.950663722424  | 5.609384861479  | 10.210870099219 | C  | -0.965868883027 | 4.437099585163  | 10.240819742870 |
| C  | 0.792573623574  | 3.730103069715  | 8.943826484420  | H  | -1.597968485366 | 4.997677357182  | 10.940927188228 |
| C  | 2.027923796762  | 3.520990018313  | 8.254088159953  | C  | 0.350654859156  | 4.736456976378  | 9.871250869679  |
| C  | 2.251777703044  | 2.438570491485  | 7.353547839018  | H  | 0.951360453094  | 5.585369628351  | 10.221879213731 |
| C  | 3.488440120141  | 2.120326841623  | 6.669509495558  | C  | 0.787823497705  | 3.723362910200  | 8.931073656735  |
| H  | 4.426905199190  | 2.682017447163  | 6.756743263254  | C  | 2.028409015008  | 3.530114251338  | 8.248775287771  |
| C  | 3.273556917919  | 0.976866894460  | 5.918846326921  | C  | 2.260799206066  | 2.446552166461  | 7.352439628671  |
| H  | 4.008218652078  | 0.452064457073  | 5.295527135661  | C  | 3.495359779624  | 2.118384933346  | 6.670373843900  |
| C  | 1.896536200302  | 0.572899669976  | 6.124637770712  | H  | 4.436004809054  | 2.676320109520  | 6.756143033275  |
| C  | 2.016030311562  | -1.393405500674 | 4.595961877294  | C  | 3.273247644495  | 0.973136428178  | 5.923471482821  |
| C  | 2.393777568735  | -2.719375375843 | 4.899893604429  | H  | 4.002436175618  | 0.442593765692  | 5.298915682315  |
| C  | 3.121388170305  | -3.516071598921 | 3.999002917545  | C  | 1.894614980170  | 0.574808098945  | 6.130458916313  |
| C  | 3.495885554659  | -2.986607498623 | 2.751741600940  | C  | 2.008864055225  | -1.392563748600 | 4.605475385614  |
| C  | 3.138737698554  | -1.668710618602 | 2.417133626393  | C  | 2.400605162948  | -2.711929126528 | 4.919621081555  |
| C  | 2.406905037045  | -0.894775173532 | 3.334255753146  | C  | 3.131845677540  | -3.509275825690 | 4.022253387826  |
| C  | 3.136861980136  | 4.489893451738  | 8.493530061531  | C  | 3.495786175536  | -2.986533471066 | 2.768981657013  |
| C  | 3.617403012123  | 5.335628024689  | 7.469614988404  | C  | 3.124373465633  | -1.675152456571 | 2.424354524181  |
| C  | 4.651244444909  | 6.262298684954  | 7.688559708060  | C  | 2.388938563531  | -0.900551343713 | 3.338060723922  |
| C  | 5.229553750404  | 6.367720283753  | 8.965583768541  | C  | 3.130513793436  | 4.504788293754  | 8.491793629665  |
| C  | 4.773131793310  | 5.543159287775  | 10.008698564241 | C  | 3.613637564356  | 5.347280251288  | 7.466202982924  |
| C  | 3.740667618049  | 4.621525814724  | 9.763256305722  | C  | 4.644363274008  | 6.277165786395  | 7.685857563105  |
| C  | -4.523299981782 | -1.442477576907 | 7.467746173835  | C  | 5.217104930304  | 6.388773261991  | 8.964886195815  |
| C  | -4.529689347139 | -2.778511890789 | 7.927152411217  | C  | 4.758329660039  | 5.567310964593  | 10.009452944007 |
| C  | -5.681058711914 | -3.582759589705 | 7.874621752299  | C  | 3.729638734187  | 4.641720054135  | 9.763344066796  |
| C  | -6.875834779524 | -3.052004073181 | 7.357824344589  | C  | -4.549581666790 | -1.446807874830 | 7.459792069040  |
| C  | -6.906485074127 | -1.725013111250 | 6.894977509303  | C  | -4.569582468425 | -2.786503903688 | 7.907433328794  |
| C  | -5.740598800332 | -0.942380884768 | 6.954094686564  | C  | -5.730774256112 | -3.576423369641 | 7.852244778642  |
| F  | 2.071864475146  | -3.254929677592 | 6.089759855831  | C  | -6.920994957300 | -3.026414278516 | 7.345161681186  |
| F  | 3.470070645712  | -4.769885682370 | 4.323682796120  | C  | -6.938065077394 | -1.694693541497 | 6.895092541209  |
| F  | 4.190649266512  | -3.734656639301 | 1.885773030207  | C  | -5.762540091745 | -0.926871745009 | 6.956092288616  |
| F  | 3.487171795546  | -1.165340285966 | 1.223704822561  | F  | 2.086382746431  | -3.240337455724 | 6.114470305511  |
| F  | 2.067712176203  | 0.353344549040  | 2.969140343743  | F  | 3.493387151222  | -4.756991551382 | 4.355497078401  |
| F  | 3.073896545159  | 5.283665928912  | 6.241805699098  | F  | 4.194063967046  | -3.735054076651 | 1.906543867671  |
| F  | 5.078465056643  | 7.055049234094  | 6.694887375498  | F  | 3.463529550921  | -1.178525894450 | 1.225636017237  |
| F  | 6.212838665970  | 7.248436993324  | 9.186859911824  | F  | 2.037301274853  | 0.341740521689  | 2.965635501686  |
| F  | 5.331805122397  | 5.633898772402  | 11.224401775674 | F  | 3.075084728120  | 5.288853356100  | 6.236647572692  |
| F  | 3.347823636675  | 3.836517721390  | 10.780643151037 | F  | 5.073886276484  | 7.066921143938  | 6.690995124372  |
| F  | -3.416438402716 | -3.316368122393 | 8.453244448969  | F  | 6.197190713175  | 7.272664524174  | 9.186796578814  |
| F  | -5.652592614390 | -4.844701182235 | 8.327662657011  | F  | 5.312032608529  | 5.663866899685  | 11.226816937337 |
| F  | -7.979450319268 | -3.807647998727 | 7.305470453116  | F  | 3.335261173255  | 3.858803226573  | 10.781615474450 |
| F  | -8.041692064549 | -1.220516994848 | 6.389620782435  | F  | -3.460127017917 | -3.341773078641 | 8.423179275953  |
| F  | -5.806171788543 | 0.312132120172  | 6.476250398310  | F  | -5.715551903763 | -4.842760702981 | 8.292911163580  |
| N  | 1.310995447338  | 1.471487699567  | 7.000285686573  | F  | -8.033631796028 | -3.768188452521 | 7.290283374104  |
| N  | -0.255873705300 | 2.868464626083  | 8.765681579731  | F  | -8.069329208802 | -1.171883599678 | 6.400135819570  |
| N  | -2.244264615885 | 1.392314228489  | 8.453440189519  | F  | -5.814170049425 | 0.333516258833  | 6.492903130407  |
| N  | -0.934387712100 | -0.343457981666 | 6.737812605207  | N  | 1.323829843778  | 1.484624894683  | 6.999690514156  |
| Mn | -0.484165839024 | 1.334395795298  | 7.660549930587  | N  | -0.260295670150 | 2.862634128043  | 8.755996759353  |
| O  | 0.002912753988  | 0.202182817389  | 9.084678214878  | N  | -2.225502162434 | 1.356657300150  | 8.468095566935  |
| O  | -0.515834930511 | -0.860266834095 | 9.546641923160  | N  | -0.965695948989 | -0.347784430263 | 6.730944832351  |
| O  | -1.158522654874 | 2.226862492780  | 6.222583727480  | Mn | -0.508628844046 | 1.326097113591  | 7.598994774474  |
| H  | -2.134384461887 | 2.144426652744  | 6.227732066655  | O  | 0.241348810406  | 0.227736345899  | 9.092895758186  |

### BP86-Optimized <sup>3</sup>[(TPC)Mn<sup>III</sup>(OH)(O<sub>2</sub>)]-t

|   |                 |                 |                 |
|---|-----------------|-----------------|-----------------|
| C | 1.228074632549  | -0.556968693575 | 5.568475719505  |
| C | -0.114293284553 | -0.965362261959 | 5.839328090028  |
| C | -0.832550439260 | -2.078120324732 | 5.246504409781  |
| H | -0.432770155678 | -2.763920013650 | 4.489473523625  |
| C | -2.102249962679 | -2.096677079339 | 5.798443700956  |
| H | -2.911402756713 | -2.799969534340 | 5.565970374133  |
| C | -2.188221529357 | -0.998945563533 | 6.740894257781  |
| C | -3.314195076732 | -0.615752805348 | 7.526867211558  |
| C | -3.313271583107 | 0.528873550960  | 8.381118197165  |
| C | -4.313376765568 | 1.051700566578  | 9.287793407705  |
| H | -5.304507330989 | 0.615128440737  | 9.465559681963  |
| C | -3.783677046420 | 2.194909736892  | 9.900005968201  |
| H | -4.276059534009 | 2.831236429492  | 10.645989091984 |
| C | -2.460974074532 | 2.371563745000  | 9.375602548979  |
| C | -1.337189950854 | 3.249258020145  | 9.524756718906  |

### BP86-Optimized <sup>5</sup>[(TPFC)Mn<sup>III</sup>(OH)(O<sub>2</sub>)]-

|   |                 |                 |                |
|---|-----------------|-----------------|----------------|
| C | 1.229785030105  | -0.553408574714 | 5.570541717384 |
| C | -0.113187406787 | -0.954206590371 | 5.841888822517 |
| C | -0.831906435837 | -2.067865955271 | 5.253454334924 |
| H | -0.430162021913 | -2.762662253163 | 4.505747384726 |
| C | -2.105963366247 | -2.072870922638 | 5.794448201001 |
| H | -2.916650794080 | -2.775050092416 | 5.564167109410 |
| C | -2.192071822272 | -0.967532166466 | 6.727320454775 |
| C | -3.319328859425 | -0.594043037533 | 7.517042771397 |
| C | -3.318440303021 | 0.535050674579  | 8.390672222333 |
| C | -4.312530832553 | 1.039496689862  | 9.314629508650 |
| H | -5.304835455276 | 0.603629619718  | 9.487519135937 |
| C | -3.772771856802 | 2.164741521527  | 9.951073934245 |

|    |                 |                 |                 |    |                 |                 |                 |
|----|-----------------|-----------------|-----------------|----|-----------------|-----------------|-----------------|
| H  | -4.258103017398 | 2.786542617965  | 10.713828727658 | C  | -4.237957591449 | 1.003710229115  | 9.312741061467  |
| C  | -2.451960566420 | 2.346930112311  | 9.421724143701  | H  | -5.187072521457 | 0.509708850411  | 9.557289378065  |
| C  | -1.329172679334 | 3.227628913216  | 9.565131809703  | C  | -3.702605819570 | 2.138974328742  | 9.930340689110  |
| C  | -0.945630685553 | 4.396326113560  | 10.301737078781 | H  | -4.149201555565 | 2.718811283931  | 10.747937264076 |
| H  | -1.562825417068 | 4.936412066083  | 11.030726129085 | C  | -2.431686479416 | 2.384854064212  | 9.311275669066  |
| C  | 0.362542232378  | 4.711404222083  | 9.910045209197  | C  | -1.311257856084 | 3.268488561224  | 9.452837311973  |
| H  | 0.967354453636  | 5.553317807115  | 10.270313719779 | C  | -0.903237174581 | 4.381467774909  | 10.262292984551 |
| C  | 0.781857282443  | 3.725934204435  | 8.936583735331  | H  | -1.502810805590 | 4.875443859786  | 11.037372278700 |
| C  | 2.012101133611  | 3.543573702969  | 8.235149856531  | C  | 0.404609856946  | 4.700697998168  | 9.878944944427  |
| C  | 2.238272467619  | 2.465262366215  | 7.330311454646  | H  | 1.032952056126  | 5.497338010132  | 10.297203002694 |
| C  | 3.476089868833  | 2.143456310125  | 6.650539339007  | C  | 0.796375364152  | 3.770323060517  | 8.841993947734  |
| H  | 4.412316204998  | 2.709028143332  | 6.734684164133  | C  | 2.032178678618  | 3.576058511763  | 8.157387386511  |
| C  | 3.264813504460  | 0.989280244315  | 5.915251140104  | C  | 2.249914169542  | 2.502482345299  | 7.245762772193  |
| H  | 3.998964790578  | 0.457363077622  | 5.297711881332  | C  | 3.504323819787  | 2.149287189008  | 6.614977384325  |
| C  | 1.888752110210  | 0.584887358830  | 6.124848727244  | H  | 4.454212830920  | 2.681861248273  | 6.748160004692  |
| C  | 2.013804047047  | -1.398165758154 | 4.618605660074  | C  | 3.556788367372  | -2.948424516035 | 2.723660154797  |
| C  | 2.402321507695  | -2.715062014433 | 4.946910366926  | H  | 4.028112610245  | 0.451427399293  | 5.276554778620  |
| C  | 3.137325936569  | -3.521478617309 | 4.060800828250  | C  | 1.891268062860  | 0.648687240059  | 6.015102077511  |
| C  | 3.508462822926  | -3.010733821044 | 2.804692321144  | C  | 2.030311599097  | -1.336455712205 | 4.513575777819  |
| C  | 3.140269971309  | -1.702199992721 | 2.446032573326  | C  | 2.417309107153  | -2.652456493062 | 4.848458471517  |
| C  | 2.400920079804  | -0.918371210612 | 3.348671601554  | C  | 3.166079397261  | -3.458786046963 | 3.973951048080  |
| C  | 3.116557230239  | 4.516845904123  | 8.475201361255  | C  | 3.556788367372  | -2.948424516035 | 2.723660154797  |
| C  | 3.579747932535  | 5.375543968673  | 7.454022524690  | C  | 3.193600997260  | -1.640011523575 | 2.359412802636  |
| C  | 4.612582025580  | 6.304155155601  | 7.669199168080  | C  | 2.439501373497  | -0.856722390959 | 3.250083147242  |
| C  | 5.208633277824  | 6.396699119238  | 8.939099442664  | C  | 3.159506123381  | 4.512978803875  | 8.435739537244  |
| C  | 4.770471020391  | 5.558148202599  | 9.978937234874  | C  | 3.652347501065  | 5.385882529127  | 7.441017267721  |
| C  | 3.738837639716  | 4.634543459296  | 9.737345553073  | C  | 4.707791353781  | 6.280666537217  | 7.687529008495  |
| C  | -4.554312660117 | -1.425862789792 | 7.441762284289  | C  | 5.298662976679  | 6.321467194992  | 8.962544162454  |
| C  | -4.577134242154 | -2.766722471200 | 7.885183362291  | C  | 4.832502205935  | 5.465864963800  | 9.975942865904  |
| C  | -5.739201214471 | -3.554965844852 | 7.824087302184  | C  | 3.777958537822  | 4.577320998251  | 9.703258439251  |
| C  | -6.927364799677 | -3.001467937384 | 7.315892214683  | C  | -4.487565899351 | -1.459939279681 | 7.445137390115  |
| C  | -6.941589448980 | -1.668146508367 | 6.870486532222  | C  | -4.446883123829 | -2.795191526057 | 7.904488549498  |
| C  | -5.765222437208 | -0.902024277414 | 6.937669315954  | C  | -5.583160897391 | -3.622385056976 | 7.901639727498  |
| F  | 2.081142782123  | -3.232169996340 | 6.144850590836  | C  | -6.810528665628 | -3.114806959513 | 7.441030794943  |
| F  | 3.495571384599  | -4.766463099206 | 4.407440981803  | C  | -6.888994689065 | -1.787714169950 | 6.983792148275  |
| F  | 4.210386492317  | -3.767939602479 | 1.952875312865  | C  | -5.737414286919 | -0.982196108969 | 6.991931657267  |
| F  | 3.486199123979  | -1.217048338536 | 1.244574183154  | F  | 2.082780623050  | -3.169091129590 | 6.043379573029  |
| F  | 2.052255261022  | 0.320643695367  | 2.962686568495  | F  | 3.521383424969  | -4.702979899786 | 4.327492199481  |
| F  | 3.020039978716  | 5.333164380061  | 6.233297723746  | F  | 4.272501210292  | -3.705584537430 | 1.882932401806  |
| F  | 5.022973210856  | 7.109665920129  | 6.678904354850  | F  | 3.558411421580  | -1.154656337405 | 1.163374062343  |
| F  | 6.191197541046  | 7.278882771015  | 9.156849168663  | F  | 2.097156140958  | 0.382464257213  | 2.858522308917  |
| F  | 5.346379907822  | 5.636735402648  | 11.187260291173 | F  | 3.100372504069  | 5.390217558815  | 6.216102204641  |
| F  | 3.364484874601  | 3.835094555674  | 10.750306259269 | F  | 5.146035228516  | 7.101621462052  | 6.722084600140  |
| F  | -3.469659026492 | -3.325016442021 | 8.401849170081  | F  | 6.303102152913  | 7.170642825674  | 9.210154690672  |
| F  | -5.726858932861 | -4.822852926739 | 8.260268174748  | F  | 5.403676972012  | 5.494726935370  | 11.188830928876 |
| F  | -8.040785906939 | -3.741571015509 | 7.255481842113  | F  | 3.377926590309  | 3.759132116619  | 10.691355937159 |
| F  | -8.071051375925 | -1.141843206006 | 6.375219041326  | F  | -3.300876861640 | -3.311252329615 | 8.379977645093  |
| F  | -5.813980082561 | 0.360774582783  | 6.480913655586  | F  | -5.509063944197 | -4.883990421848 | 8.350272742127  |
| N  | 1.305959320532  | 1.495643427842  | 6.983852807696  | F  | -7.899865613697 | -3.892513385672 | 7.436510816418  |
| N  | -0.269851222521 | 2.866780551468  | 8.756282355271  | F  | -8.056355463608 | -1.304624400197 | 6.534122272415  |
| N  | -2.224879962437 | 1.351003230383  | 8.494131128892  | F  | -5.849170467407 | 0.273293392101  | 6.526130208142  |
| N  | -0.965280021529 | -0.318261322975 | 6.721124785513  | N  | 1.295045658193  | 1.568574558312  | 6.855123193594  |
| Mn | -0.537530228924 | 1.372913749522  | 7.570935984851  | N  | -0.272737223884 | 2.943395516763  | 8.605128425572  |
| O  | 0.293224380695  | 0.226691936814  | 9.123412583950  | N  | -2.231784967667 | 1.430057038238  | 8.333504765885  |
| O  | -0.367818306667 | -0.763477993499 | 9.607463871412  | N  | -0.958379229895 | -0.237052432410 | 6.599839863399  |
| O  | -1.182157350273 | 2.333012568797  | 6.132193112769  | Mn | -0.633818515834 | 1.602321862746  | 7.237561765392  |
| H  | -2.004124089092 | 1.901478431273  | 5.820347689873  | O  | -1.180941221924 | -0.030537149175 | 11.089487544388 |

**BP86-Optimized  $^7[(\text{TPFC})\text{Mn}^{\text{III}}(\text{OH})(\text{O}_2)]^-$**

|   |                 |                 |                |
|---|-----------------|-----------------|----------------|
| C | 1.234815329890  | -0.487009843843 | 5.450332383995 |
| C | -0.104835063296 | -0.889458169996 | 5.729409218511 |
| C | -0.798250181361 | -2.042021446306 | 5.190052782389 |
| H | -0.385701932489 | -2.754639793521 | 4.465411739920 |
| C | -2.060629436428 | -2.067591914559 | 5.755234701482 |
| H | -2.852368740111 | -2.803008431850 | 5.566532746723 |
| C | -2.162594740923 | -0.933734159711 | 6.650307056911 |
| C | -3.282740887262 | -0.582587806740 | 7.458012190684 |
| C | -3.291022744198 | 0.562108836642  | 8.309523282700 |

**C.  $[(\text{TPFC})\text{Mn}^{\text{III}}]$**

**B3LYP-optimized**

|   |                 |                 |                |
|---|-----------------|-----------------|----------------|
| C | 0.829611992207  | -0.552686227471 | 5.191574288115 |
| C | -0.479070691738 | -0.978879396830 | 5.531442486691 |
| C | -1.200965891383 | -2.103539500358 | 4.994000505182 |
| H | -0.830968533091 | -2.785967913791 | 4.231921794206 |
| C | -2.433556025870 | -2.140770407567 | 5.601537766539 |

|    |                 |                 |                 |    |                 |                 |                 |
|----|-----------------|-----------------|-----------------|----|-----------------|-----------------|-----------------|
| H  | -3.228476799955 | -2.859130381201 | 5.412394625483  | C  | -2.506952745135 | -1.040417438639 | 6.529378881760  |
| C  | -2.508119294468 | -1.041024212970 | 6.527426498097  | C  | -3.601191295743 | -0.690114489952 | 7.356140282745  |
| C  | -3.602629665749 | -0.690354173841 | 7.352324300600  | C  | -3.605676320056 | 0.458024165439  | 8.192018274732  |
| C  | -3.608693174588 | 0.458871117089  | 8.188126470927  | C  | -4.578570465750 | 0.975484611053  | 9.112650758596  |
| C  | -4.582264824439 | 0.978142303325  | 9.108667973319  | H  | -5.547957974304 | 0.529390758465  | 9.328132338760  |
| H  | -5.552891074275 | 0.534829738548  | 9.324306185082  | C  | -4.057503015592 | 2.136415385731  | 9.682415568034  |
| C  | -4.059780031796 | 2.137771323280  | 9.679413956727  | H  | -4.539014057836 | 2.772717023168  | 10.422431467426 |
| H  | -4.541921903234 | 2.773586080589  | 10.419971283272 | C  | -2.764509567024 | 2.330552421384  | 9.121585934218  |
| C  | -2.765611104302 | 2.330986376723  | 9.119235342369  | C  | -1.656466802429 | 3.225183582803  | 9.219070288028  |
| C  | -1.655676360499 | 3.224946819218  | 9.218969005290  | C  | -1.289379308243 | 4.434012353605  | 9.873334289133  |
| C  | -1.287436517704 | 4.432338204388  | 9.876778918603  | H  | -1.906518221700 | 5.002496188496  | 10.566394220573 |
| H  | -1.903700273646 | 5.000494302806  | 10.571456076962 | C  | 0.000258920880  | 4.751340887394  | 9.449120086613  |
| C  | 0.002591421968  | 4.749789288076  | 9.454312514523  | H  | 0.582045616692  | 5.622021485874  | 9.746695265163  |
| H  | 0.583746541211  | 5.619452910224  | 9.756068619175  | C  | 0.430809751149  | 3.729840787088  | 8.536336000898  |
| C  | 0.432927063792  | 3.730263128088  | 8.537549619017  | C  | 1.634350702836  | 3.553193557637  | 7.803460482329  |
| C  | 1.635925291474  | 3.553593169536  | 7.80226234407   | C  | 1.849392857461  | 2.4690629259370 | 6.919334421098  |
| C  | 1.849319314734  | 2.471810285175  | 6.916142224766  | C  | 3.046424201267  | 2.176747219549  | 6.178665487411  |
| C  | 3.044653822971  | 2.182255170811  | 6.167983453797  | H  | 3.963341982753  | 2.761738744114  | 6.211294327097  |
| H  | 3.961159549261  | 2.767946707202  | 6.194759643045  | C  | 2.825992368794  | 1.030086877148  | 5.449939448969  |
| C  | 2.824435491928  | 1.037507910714  | 5.439369358808  | H  | 3.532992958841  | 0.528109827138  | 4.792676966719  |
| H  | 3.531870459544  | 0.541317807655  | 4.778508774227  | C  | 1.485260790343  | 0.587409986195  | 5.725010053634  |
| C  | 1.484496859235  | 0.588719968120  | 5.719081057118  | C  | 1.576271946819  | -1.366119947172 | 4.195242348622  |
| C  | 1.579112911366  | -1.369188821445 | 4.190432705203  | C  | 2.013139082804  | -2.668060297614 | 4.481959384709  |
| C  | 2.032989807484  | -2.662148272486 | 4.486336756191  | C  | 2.714530336149  | -3.437490273967 | 3.551595509356  |
| C  | 2.735452163776  | -3.432560024702 | 3.558410578711  | C  | 3.000144345145  | -2.904586734450 | 2.292652785962  |
| C  | 3.004868313346  | -2.910285590178 | 2.292474541772  | C  | 2.580634088802  | -1.611141687100 | 1.974280782843  |
| C  | 2.567680315524  | -1.625879543836 | 1.965209264950  | C  | 1.877666992167  | -0.863148799772 | 2.920567164412  |
| C  | 1.864134223212  | -0.876415538263 | 2.909146012620  | C  | 2.714775022178  | 4.562849418390  | 7.969769523006  |
| C  | 2.717494995735  | 4.564930585231  | 7.971975151732  | C  | 3.116997331300  | 5.392215458536  | 6.911034353935  |
| C  | 3.106277949954  | 5.410583436076  | 6.922568951898  | C  | 4.118856996669  | 6.352856843696  | 7.060380458476  |
| C  | 4.106906050180  | 6.371077803548  | 7.076325183330  | C  | 4.745169375791  | 6.508906286722  | 8.298843547968  |
| C  | 4.746315884436  | 6.509575017451  | 8.309202249638  | C  | 4.367445169350  | 5.702102555982  | 9.374362958786  |
| C  | 4.381763302280  | 5.685659870571  | 9.375135830698  | C  | 3.364975214554  | 4.746182000286  | 9.199979795938  |
| C  | 3.379830118874  | 4.730618749453  | 9.197011296954  | C  | -4.802821544832 | -1.567537730283 | 7.353470323676  |
| C  | -4.807032385425 | -1.567864675272 | 7.351777082083  | C  | -4.747867423869 | -2.891305389757 | 7.817618248518  |
| C  | -4.757653266465 | -2.884982251837 | 7.832064078668  | C  | -5.869742156770 | -3.721972491813 | 7.826185717884  |
| C  | -5.880763681545 | -3.713071666404 | 7.842972540844  | C  | -7.094147282047 | -3.231501580210 | 7.367220627088  |
| C  | -7.100631122619 | -3.226945841543 | 7.370143727831  | C  | -7.185213925955 | -1.917866716807 | 6.902048633961  |
| C  | -7.185483132787 | -1.919689714259 | 6.888735082402  | C  | -6.048713792532 | -1.106972225850 | 6.900053326318  |
| C  | -6.048088559094 | -1.110967586956 | 6.884711486704  | F  | 1.766638623517  | -3.206013418273 | 5.680500347504  |
| F  | 1.801534802157  | -3.191972935606 | 5.689367242088  | F  | 3.119767599987  | -4.670528853808 | 3.859068205427  |
| F  | 3.155556842258  | -4.656333011169 | 3.874785055607  | F  | 3.670059052490  | -3.627710604544 | 1.398329052351  |
| F  | 3.674870944875  | -3.633771907436 | 1.401305345488  | F  | 2.846491110168  | -1.103434839045 | 0.769846480735  |
| F  | 2.818250522855  | -1.127270508552 | 0.755756610674  | F  | 1.483244886506  | 0.367204176136  | 2.578004916135  |
| F  | 1.455900094175  | 0.344714331761  | 2.557317024087  | F  | 2.527764234717  | 5.284866925312  | 5.716208473025  |
| F  | 2.508265663721  | 5.318946811072  | 5.732995481873  | F  | 4.472069748729  | 7.128194434934  | 6.034411243994  |
| F  | 4.447533503537  | 7.160732637984  | 6.059481791337  | F  | 5.700187076945  | 7.422688559587  | 8.453216580271  |
| F  | 5.699555436508  | 7.421840505947  | 8.467209202982  | F  | 4.970735662040  | 5.843241382727  | 10.555292041720 |
| F  | 4.995382269726  | 5.810303415192  | 10.550468681644 | F  | 3.040344347030  | 3.982686805238  | 10.247947396374 |
| F  | 3.067329782420  | 3.953779447405  | 10.236309414788 | F  | -3.597899239400 | -3.390606060487 | 8.280927821200  |
| F  | -3.613390021667 | -3.381789954742 | 8.306453879221  | F  | -5.782499499562 | -4.973269433343 | 8.279164426207  |
| F  | -5.798164807880 | -4.957521135301 | 8.309968994208  | F  | -8.170551755534 | -4.013917656210 | 7.372407673214  |
| F  | -8.176942135986 | -4.006254456777 | 7.377518586985  | F  | -8.351508620422 | -1.450300130143 | 6.455247927545  |
| F  | -8.346323564183 | -1.455368674192 | 6.430087596362  | F  | -6.170984152836 | 0.138953945871  | 6.431739802825  |
| F  | -6.166436277040 | 0.128164167313  | 6.403148439516  | N  | 0.922711662074  | 1.474537796199  | 6.621464506831  |
| N  | 0.926656679580  | 1.474088915121  | 6.617345115233  | N  | -0.594607700887 | 2.833055736393  | 8.430261909632  |
| N  | -0.593374272974 | 2.837543370005  | 8.432147972141  | N  | -2.534486876576 | 1.305941411772  | 8.226624578873  |
| N  | -2.540349067163 | 1.306992054626  | 8.225504671669  | N  | -1.296900838696 | -0.356838199523 | 6.459165071440  |
| N  | -1.297994956481 | -0.358602845522 | 6.452177952776  | Mn | -0.826417824557 | 1.257827419495  | 7.379233512451  |
| Mn | -0.827397145649 | 1.259212670775  | 7.377271314483  |    |                 |                 |                 |

#### BP86-optimized

|   |                 |                 |                |   |                 |                 |                |
|---|-----------------|-----------------|----------------|---|-----------------|-----------------|----------------|
| C | 0.828456785256  | -0.552094080869 | 5.196286414027 | C | 0.834602660891  | -0.557878822672 | 5.185671701511 |
| C | -0.480826058126 | -0.977921476398 | 5.533649399835 | C | -0.480816757305 | -0.983374561132 | 5.525746613502 |
| C | -1.203146664486 | -2.097126204389 | 4.990877234594 | C | -1.205668844360 | -2.106932032676 | 4.979186296137 |
| H | -0.832490663168 | -2.774621625997 | 4.224468488771 | H | -0.831301499978 | -2.787683547704 | 4.205253769407 |
| C | -2.436952619956 | -2.134762416588 | 5.599750110038 | C | -2.447228461556 | -2.146236391549 | 5.591916805709 |
| H | -3.235814605571 | -2.848616245339 | 5.409394021324 | H | -3.252982028240 | -2.864766127726 | 5.399112863448 |
|   |                 |                 |                | C | -2.516676038449 | -1.048707191802 | 6.526430528280 |

C -3.616878369034 -0.699573179053 7.357556580204  
C -3.616600758885 0.454006123949 8.195976699742  
C -4.594069636712 0.972942789121 9.122276752534  
H -5.569801867335 0.521141036963 9.340712237708  
C -4.070042722705 2.141413479704 9.694593291576  
H -4.554367886123 2.782720392839 10.441145051336  
C -2.772183824824 2.335679576205 9.129371990577  
C -1.661092557092 3.233212547021 9.227023206174  
C -1.294273439999 4.447353846042 9.885057807047  
H -1.916938672424 5.019500028686 10.583725052681  
C 0.002691051063 4.767751487128 9.457675315900  
H 0.589022144634 5.645867894526 9.755975589840  
C 0.435297825976 3.741058149939 8.540243630699  
C 1.645620411515 3.567886568542 7.806301496260  
C 1.859576107068 2.477791824794 6.918257405530  
C 3.061843616794 2.184035761638 6.175844338128  
H 3.986406200774 2.772852093468 6.210386804797  
C 2.839205248791 1.030128939989 5.442742230545  
H 3.551239717466 0.522340481874 4.781115369074  
C 1.492223294543 0.586984311065 5.718472286567  
C 1.584887198410 -1.375234586962 4.183130591267  
C 2.038500577929 -2.677540239154 4.482252014841  
C 2.745301302590 -3.453750035820 3.547533336331  
C 3.017447936939 -2.925576835288 2.273160839277  
C 2.579928662917 -1.630646483754 1.943429229174  
C 1.872228128163 -0.875962689891 2.894767936385  
C 2.728163908994 4.580267865820 7.975732984785  
C 3.122019115658 5.425617477865 6.915484557125  
C 4.130133035223 6.392725570595 7.068818821648  
C 4.769567274505 6.536522560542 8.312813912796  
C 4.399241182095 5.711950321982 9.389832602432  
C 3.389965842802 4.750307508024 9.211135182729  
C -4.822771052790 -1.577397437673 7.355891454258  
C -4.770084617022 -2.905041828920 7.834232246141  
C -5.900901580173 -3.739362486506 7.843296489588  
C -7.130007614583 -3.246463067341 7.370651503098  
C -7.217405115398 -1.927697440966 6.890859821081  
C -6.071781420737 -1.113522681737 6.888831720889  
F 1.806724133892 -3.207582352527 5.694310058463  
F 3.167870657627 -4.685511671980 3.8638811632854  
F 3.690787798927 -3.653807619433 1.375912824229  
F 2.832795711453 -1.130054987544 0.726332979884  
F 1.458702863980 0.352423011590 2.542868894880  
F 2.519000119681 5.330195695304 5.719394605431  
F 4.476389849415 7.184354344277 6.044742367117  
F 5.729010024417 7.454506435788 8.470811263072  
F 5.015118807226 5.841893014369 10.572640936096  
F 3.073378373566 3.968837566870 10.256495329226  
F -3.617985745283 -3.402960895942 8.311949971711  
F -5.819084881689 -4.992937428527 8.309286963176  
F -8.213091269719 -4.030719248548 7.376342170900  
F -8.386175324792 -1.460616113182 6.431456469878  
F -6.187757030601 0.134072254550 6.405299864233  
N 0.924332772993 1.479225247913 6.619984270608  
N -0.593577771868 2.837153753585 8.431703690694  
N -2.538407382365 1.305213581294 8.227828173066  
N -1.300448096822 -0.358225138805 6.458390592387  
Mn -0.826207467439 1.257978811539 7.377577955080

**D. O<sub>2</sub>**

**B3LYP-optimized**

O 0.060232631343 -0.722379593664 0.000000000000  
O 1.259767375311 -0.722379593664 0.000000000000

**TPSSh-optimized**

O 0.058490305788 -0.722379593664 0.000000000000  
O 1.261509700865 -0.722379593664 0.000000000000

**BP86-optimized**

O 0.051865156259 -0.722379593664 0.000000000000  
O 1.268134850395 -0.722379593664 0.000000000000

**E. OH**

**OH-radical**

O 0.007917434510 0.000000000000 0.000000000000  
H 0.992082565490 0.000000000000 0.000000000000

**OH-**

O 0.009036734100 0.000000000000 0.000000000000  
H 0.990963265900 0.000000000000 0.000000000000

**F. THF**

**TPSSh-optimized THF**

C 3.773102702157 -2.433083045577 9.091042962501  
O 3.487444408717 -1.076124493159 9.451477890616  
C 4.25651527656 -0.179748999482 8.640360491981  
C 5.305226698636 -1.041802469386 7.936579518976  
C 4.550125456393 -2.366053569500 7.775432676219  
H 4.378568208661 -2.908379840010 9.886919240370  
H 2.824168308364 -2.987981213550 9.008856247572  
H 3.593138601764 0.317850357506 7.906473462324  
H 4.693701212746 0.599533778775 9.285713412178  
H 5.645052967479 -0.608404070512 6.984464458601  
H 6.186363190671 -1.180830922660 8.584546724019  
H 3.855581077125 -2.308100096140 6.921168711393  
H 5.208224639629 -3.234210416306 7.623646203249

**THF-radical**

C 3.176018023322 -2.246393545560 8.847006672735  
O 3.115412552934 -1.488866706991 9.994693731897  
C 3.699779220945 -0.204383248748 9.710063647873  
C 4.753603273568 -0.490118431165 8.640119364301  
C 4.090370489801 -1.623163758343 7.827636179626  
H 3.023194455076 -3.316058239287 9.012239659036  
H 2.914133099277 0.477171299370 9.335783575082  
H 4.100024372975 0.196986515422 10.651082179689  
H 4.998569550324 0.397230177704 8.039376804840  
H 5.678903717478 -0.853561711345 9.114473871514  
H 3.527186217129 -1.210165245587 6.968092727925  
H 4.821931027172 -2.336041105471 7.412471585483

**G. [(TPFC)Mn<sup>V</sup>(O)]**

**Singlet [(TPFC)Mn<sup>V</sup>(O)]**

C 0.783394880403 -0.583990174114 5.259022042999  
C -0.514055068912 -0.979969326824 5.611699740006  
C -1.245995838631 -2.066650368031 5.034760570446  
H -0.883016825442 -2.713925500239 4.239791735371  
C -2.466309610713 -2.112642436219 5.658896229088  
H -3.287358099473 -2.796649808552 5.456078129366  
C -2.504683308438 -1.049135915520 6.617293056978  
C -3.616185623255 -0.715159763059 7.412113039727  
C -3.598761785446 0.428241823226 8.218662773302  
C -4.616525449589 1.022541674200 9.032825360475  
H -5.614698352679 0.616922828851 9.184694772059  
C -4.099830948226 2.190118623966 9.574075718867  
H -4.606951365329 2.897314582814 10.226911393101  
C -2.764111070350 2.300883673260 9.103134323544  
C -1.672010899206 3.177640984690 9.199216021209  
C -1.348473769370 4.434279010608 9.776706646847  
H -2.008330114774 5.043325153439 10.390811672447  
C -0.053238097049 4.732064781671 9.378968494339  
H 0.518722010525 5.624777031180 9.624309159670

C 0.412904201352 3.653949446309 8.559271209877  
 C 1.616421543416 3.480976664727 7.866070358892  
 C 1.799524894040 2.377040831142 7.014509039017  
 C 2.975822504266 2.113831350135 6.241129542937  
 H 3.879670772655 2.718544269170 6.257294978027  
 C 2.742307326773 0.986377522377 5.496956832501  
 H 3.423289722045 0.496956433476 4.804614375367  
 C 1.420544298166 0.534764386200 5.810598553411  
 C 1.512258988246 -1.381051380609 4.231662150697  
 C 1.967006214783 -2.679643326488 4.501902775163  
 C 2.653493379371 -3.434979647148 3.549355160845  
 C 2.899451255267 -2.890799858150 2.286603216072  
 C 2.457455557579 -1.600443100678 1.985603438331  
 C 1.772488002974 -0.864552689524 2.954264984087  
 C 2.691176756582 4.498282876545 8.010938110345  
 C 3.082651837449 5.317248406859 6.940979602398  
 C 4.078268998229 6.286077970165 7.077720828680  
 C 4.705687016501 6.459589722709 8.313594344847  
 C 4.336088482836 5.663315119210 9.399927293747  
 C 3.338418242846 4.700089386793 9.239366286102  
 C -4.834832562433 -1.566182475019 7.362042032820  
 C -4.825445798163 -2.882317216694 7.848105829520  
 C -5.961411465985 -3.692539329004 7.809776227445  
 C -7.149523748984 -3.187734736354 7.276129015284  
 C -7.191840537668 -1.881390753853 6.783906607850  
 C -6.042755951573 -1.089813252707 6.831400940000  
 F 1.751222822459 -3.224946428842 5.702014423902  
 F 3.078356847867 -4.664973302775 3.837720427038  
 F 3.553262256794 -3.600781499332 1.371561370868  
 F 2.687276895341 -1.083447096322 0.778767172578  
 F 1.358098760921 0.364446700653 2.634775093371  
 F 2.491025463082 5.188733676051 5.750220097811  
 F 4.424565174761 7.051509489000 6.043051515948  
 F 5.654438188635 7.380648879074 8.455290192196  
 F 4.938818474921 5.823991797171 10.577723504015  
 F 3.013562627361 3.950119078441 10.295939433077  
 F -3.707187312443 -3.391262988576 8.372279729809  
 F -5.921847975411 -4.937221836386 8.284649526422  
 F -8.238194339841 -3.950505167227 7.235560830428  
 F -8.322782868306 -1.401901184416 6.266759990232  
 F -6.113865520353 0.149998531499 6.338870274171  
 N 0.851085140197 1.384457176362 6.752515146582  
 N -0.590022563438 2.715418433441 8.479317259687  
 N -2.475197719811 1.222250905733 8.293754549500  
 N -1.293414594978 -0.356682853320 6.576645996061  
 Mn -0.646247063698 0.915552343114 7.877911072932  
 O -0.057492399533 0.052632080558 8.993500637180

C 1.611389261792 3.474818921985 7.915691240900  
 C 1.798017882881 2.366598291354 7.024535384773  
 C 2.983443755756 2.109854848800 6.265629413347  
 H 3.890233708890 2.710065487250 6.284581537200  
 C 2.763433770564 0.964221742020 5.530297295216  
 H 3.461234754574 0.473803408353 4.855575453432  
 C 1.439656607922 0.517281084308 5.837688535700  
 C 1.535798985328 -1.410130116650 4.264216325254  
 C 1.950576372266 -2.728907363886 4.504460561405  
 C 2.641453930848 -3.470474303573 3.544721794510  
 C 2.924876591668 -2.895978350041 2.303289085239  
 C 2.519645381787 -1.586888295305 2.031452623958  
 C 1.835356873151 -0.861579280923 3.007887841681  
 C 2.675617267263 4.507582543695 8.007178883710  
 C 3.049647526762 5.286759236863 6.990330608396  
 C 4.032986729200 6.272562051556 6.990826631583  
 C 4.669585539393 6.501198991429 8.213376306908  
 C 4.319138975442 5.744455452704 9.333975361755  
 C 3.328643956530 4.767383648700 9.223041569359  
 C -4.842934175092 -1.545155364823 7.346942675886  
 C -4.845414776765 -2.881610874442 7.777082868352  
 C -5.991406217078 -3.675102929486 7.715790604690  
 C -7.175852285308 -3.135451253166 7.207784925030  
 C -7.205370783593 -1.810196590265 6.767577481119  
 C -6.048319688429 -1.032744896620 6.842301408721  
 F 1.701408789821 -3.302508580246 5.683830282055  
 F 3.033756568879 -4.716346862364 3.805967124524  
 F 3.579361016595 -3.594255431911 1.381261695649  
 F 2.781644719578 -1.043039588723 0.844020828104  
 F 1.449449160738 0.382033164328 2.712990899774  
 F 2.444052263281 5.110936181240 5.723608734471  
 F 4.358074095276 7.002941058080 5.925491395180  
 F 5.607848870440 7.437027566354 8.309714566810  
 F 4.932053649165 5.95648975689310 4.97345269954  
 F 3.026637897738 4.05497048015310 3.10612094977  
 F -3.731114241792 -3.421523040401 8.276693977600  
 F -5.965098558694 -4.936444487170 8.143023858621  
 F -8.273022697697 -3.882569963839 7.143534940221  
 F -8.331746943553 -1.299081502957 6.273038978833  
 F -6.108056143791 0.223735832969 6.394305335845  
 N 0.867438909840 1.380386467206 6.750477597573  
 N -0.531389952706 2.690813154900 8.644187749844  
 N -2.479958408664 1.226575103596 8.310260249637  
 N -1.267231838214 -0.485886183714 6.619123655192  
 Mn -0.655462372283 0.908633025653 7.854703597702  
 O -0.053900211891 0.055229851675 9.030725433250

**Quintet [(TPFC)Mn<sup>V</sup>(O)]**

C 0.794630523421 -0.590299360771 5.256952895726  
 C -0.522687756483 -1.012460192558 5.583242321734  
 C -1.266058109115 -2.086261820585 4.980791269008  
 H -0.917652104355 -2.726262382435 4.173383028402  
 C -2.498381144678 -2.119468286400 5.594556623695  
 H -3.323637248467 -2.791510823651 5.369959275191  
 C -2.519058502847 -1.066450368300 6.573829231217  
 C -3.626496068842 -0.709409533637 7.419182870641  
 C -3.621121650520 0.410232645580 8.267656524058  
 C -4.640091375932 0.994807451781 9.109903336367  
 H -5.642588956556 0.600596542387 9.263637310070  
 C -4.112848521063 2.152950792977 9.659815160810  
 H -4.612789429848 2.849569743538 10.329287287111  
 C -2.772098290080 2.265390159036 9.167841202510  
 C -1.647052855923 3.173455402139 9.264010720645  
 C -1.331917553827 4.443047412172 9.848150256871  
 H -1.990517259866 5.046405405187 10.469166171026  
 C -0.043051126138 4.754982033383 9.443504193905  
 H 0.511701355555 5.661362093697 9.678175288347  
 C 0.426404549675 3.669136524657 8.613501576310  
 C 1.612453245000 3.493518013093 7.878601539962

**Triplet [(TPFC)Mn<sup>V</sup>(O)]**

C 0.798408349736 -0.632064025623 5.298525385248  
 C -0.496192991835 -1.076833134881 5.645315995668  
 C -1.249912697141 -2.127328628862 5.013314785361  
 H -0.907940810418 -2.751617161283 4.190790972060  
 C -2.485589179023 -2.146507272352 5.615890006980  
 H -3.327512838228 -2.789675459177 5.369039582488  
 C -2.486157133851 -1.109853144734 6.614483430545  
 C -3.609222160072 -0.719138176557 7.417333842182  
 C -3.596431933829 0.425960048230 8.223977957893  
 C -4.617350158297 1.012665006385 9.056655188978  
 H -5.619702644304 0.616278233018 9.206223794343  
 C -4.089259136375 2.164173346589 9.620543766302  
 H -4.588303164410 2.85632774233010 2.95188556728  
 C -2.746971678653 2.267661995596 9.147334121205  
 C -1.619374423676 3.154150902711 9.296106168112  
 C -1.339392983348 4.452644030512 9.836841475198  
 H -2.025851693212 5.07679591006710 4.05146185778  
 C -0.044533649982 4.760737197549 9.454187688432  
 H 0.494360608001 5.684824383866 9.654881511500  
 C 0.446906750989 3.643936364634 8.679587997102

C 1.835213467096 2.387594784020 6.987533398346  
 C 3.027816822752 2.124337896781 6.229281096180  
 H 3.935461005276 2.723375443621 6.245613934978  
 C 2.804231363594 0.981717009632 5.493390797917  
 H 3.498135065756 0.495550725814 4.811558475974  
 C 1.471166212949 0.537647957796 5.797220532194  
 C 1.527315147469 -1.398061234054 4.240782407811  
 C 1.922780964753 -2.717662812660 4.506708512495  
 C 2.610965204808 -3.484070250180 3.564777982680  
 C 2.912472042630 -2.933410776238 2.316729199161  
 C 2.527665807165 -1.623524846560 2.020347305077  
 C 1.845326649887 -0.873210207023 2.979251259721  
 C 2.679938722152 4.519843265732 8.008367928450  
 C 3.079829748626 5.307161921585 6.916612622811  
 C 4.069387972878 6.283737129512 7.034616305588  
 C 4.686205323778 6.493680271035 8.270584087093  
 C 4.310330141551 5.727548774574 9.376484310353  
 C 3.314686702353 4.759124967077 9.237683283999  
 C -4.846745289039 -1.557873724093 7.358173920929  
 C -4.820962175448 -2.895660490131 7.782446830390  
 C -5.955743886774 -3.706222520665 7.736131320896  
 C -7.156400570550 -3.182224870133 7.250320441129  
 C -7.213705317308 -1.855458693297 6.817326992419  
 C -6.067525551913 -1.060705605297 6.876885415522  
 F 1.655446993016 -3.267676271139 5.693198929837  
 F 2.983967761702 -4.730630772646 3.849249193053  
 F 3.565037821384 -3.655313442381 1.411846542950  
 F 2.807811179819 -1.102093582277 0.827171019876  
 F 1.480931853594 0.371566031064 2.662974245894  
 F 2.494054421275 5.146600611491 5.727653208431  
 F 4.419418397707 7.022199759427 5.982998612789  
 F 5.630013421716 7.420693496536 8.393604007491  
 F 4.904603608815 5.921826024728 10.552440385865  
 F 2.988407041455 4.036508599893 10.311389061872  
 F -3.690299069480 -3.420083491209 8.261041359347  
 F -5.903118403043 -4.968871401501 8.156567349255  
 F -8.242848164059 -3.945746126059 7.200519549430  
 F -8.356033800806 -1.359077302840 6.345297419500  
 F -6.153075011279 0.197824489544 6.439401346577  
 N 0.916908610897 1.407451528503 6.707616581771  
 N -0.581077025671 2.744206544766 8.548589518140  
 N -2.514748772115 1.214666446402 8.353202379415  
 N -1.315881420544 -0.411272360143 6.532370397576  
 Mn -0.701839643470 1.005363979437 7.715338533367  
 O -0.046506327199 0.078911873170 8.896076785623

**H. [(TPFC)Mn<sup>V</sup>(O)(OH)]<sup>-</sup>**

**singlet [(TPFC)Mn<sup>V</sup>(O)(OH)]<sup>-</sup>**

C 1.618629508383 -0.057134848575 5.189133487322  
 C 0.389294565193 -0.649063297959 5.593415894904  
 C -0.257677119385 -1.820286724996 5.037260339083  
 H 0.117927044094 -2.426995553040 4.215145808362  
 C -1.432799035191 -1.997373777570 5.728012625551  
 H -2.181107152263 -2.769824658720 5.558635253948  
 C -1.524236984172 -0.937396702735 6.711924891084  
 C -2.609201752990 -0.686635700447 7.599096867644  
 C -2.688638987336 0.449122653033 8.451117097337  
 C -3.704333347190 0.894787961674 9.380990750371  
 H -4.634195007478 0.374489673907 9.606143614756  
 C -3.273676694285 2.093650093677 9.935047052696  
 H -3.801813698652 2.702100234459 10.667393050963  
 C -1.991949169899 2.381051561811 9.355230734332  
 C -0.968330193121 3.380249617289 9.413316117502  
 C -0.736860176831 4.656088862858 10.007412851821  
 H -1.407091014942 5.181012057400 10.686377854987  
 C 0.497640215283 5.106142521326 9.539449122304  
 H 0.975354760778 6.054976231843 9.779440178254  
 C 1.022179787572 4.100041561154 8.656870213774

C 2.190349576186 4.054400016171 7.848644294481  
 C 2.456239429166 3.006513834774 6.933596775907  
 C 3.599991158851 2.881001571829 6.064371121213  
 H 4.440343188070 3.571558409778 6.023931958403  
 C 3.434329103998 1.739964899691 5.315508312579  
 H 4.120323705476 1.344924306042 4.568639652393  
 C 2.182960629052 1.136025972959 5.709077203874  
 C 2.373210889713 -0.749864803372 4.105086817247  
 C 2.957721398147 -2.009350286116 4.308237051966  
 C 3.659452928450 -2.676678444742 3.302347570667  
 C 3.795066173817 -2.081992365304 2.046324579946  
 C 3.227347893724 -0.828600028684 1.808488024354  
 C 2.526515348753 -0.184310155965 2.829990681457  
 C 3.151986340458 5.185039095368 7.946341374018  
 C 3.397186416477 6.050798804736 6.868418662730  
 C 4.27347090213 7.122364120874 6.961826202779  
 C 4.956014974993 7.361600624026 8.164008007840  
 C 4.731568986409 6.524818987329 9.259102718289  
 C 3.840184208986 5.456979988441 9.139737476159  
 C -3.740232786587 -1.653476831556 7.615066749423  
 C -3.570573176502 -2.979358522604 8.044959734860  
 C -4.624510940269 -3.894564189665 8.071986550141  
 C -5.898248714991 -3.492154297489 7.665153908380  
 C -6.104171806939 -2.180589451068 7.232745717344  
 C -5.033198890962 -1.285071628262 7.210518576532  
 F 2.861707555931 -2.606239196510 5.501310258725  
 F 4.207773519043 -3.871330744559 3.534996288592  
 F 4.463863595507 -2.707532141566 1.078868397838  
 F 3.348567439585 -0.261302783713 0.606214697949  
 F 1.984827805268 1.007708735792 2.557160307349  
 F 2.757832046463 5.874820545896 5.707164774575  
 F 4.490435588426 7.927390379374 5.916845420654  
 F 5.805014445507 8.382734522455 8.265262586560  
 F 5.376004913859 6.744882791497 10.406932068122  
 F 3.666808668369 4.669689677854 10.206603201161  
 F -2.371469363411 -3.399487732337 8.462130793444  
 F -4.425992802265 -5.144817389725 8.495016213247  
 F -6.912023962727 -4.355769806528 7.688535216580  
 F -7.317678104659 -1.795641086033 6.831845064918  
 F -5.269438028850 -0.045872569690 6.766192877828  
 N 1.636390007342 1.916200418538 6.703119839037  
 N 0.120437283922 3.078907989799 8.630110053625  
 N -1.698709558249 1.377708488461 8.485158137004  
 N -0.400540497451 -0.160756142446 6.585136460808  
 Mn 0.056839159245 1.449818986137 7.669265373341  
 O 0.634163459545 0.455362585164 8.722860825194  
 O -0.878400870118 2.308697014319 6.271359708221  
 H -1.752857972538 1.901106064244 6.162352905251

**triplet [(TPFC)Mn<sup>V</sup>(O)(OH)]<sup>-</sup>**

C 1.599063457972 -0.030298690906 5.154309115078  
 C 0.364573402804 -0.614214116123 5.552633665457  
 C -0.271954017825 -1.793207634258 5.007480670187  
 H 0.118496286500 -2.404235335628 4.195845751105  
 C -1.455802590127 -1.977652819938 5.683699031431  
 H -2.189642341125 -2.763302221441 5.513131367103  
 C -1.575941758530 -0.918056041868 6.658687678782  
 C -2.644271145085 -0.679614060989 7.560918963499  
 C -2.709180989921 0.454374176736 8.419198186106  
 C -3.666406875914 0.840709077227 9.625789769123  
 H -4.561396352419 0.283000834125 9.697532371958  
 C -3.234575877293 2.038259329192 9.987956302986  
 H -3.723616431727 2.602609005398 10.780115699242  
 C -2.012015968440 2.385446024019 9.333564456683  
 C -0.991528591921 3.387124766802 9.390541312473  
 C -0.729121206201 4.636691134213 10.030710261619  
 H -1.370201547041 5.134640991721 10.756110142590  
 C 0.490320680457 5.094680540895 9.539248406034  
 H 0.986446392438 6.027460841975 9.803099872140

|    |                 |                 |                 |    |                 |                 |                 |
|----|-----------------|-----------------|-----------------|----|-----------------|-----------------|-----------------|
| C  | 0.981663514542  | 4.120827226145  | 8.598098695509  | H  | 0.993634296421  | 6.035875084057  | 9.827119432468  |
| C  | 2.153419698320  | 4.090136313156  | 7.791932012211  | C  | 1.003791922187  | 4.100385617986  | 8.648121071810  |
| C  | 2.431041602482  | 3.056827568049  | 6.860188192026  | C  | 2.154780752468  | 4.063978059562  | 7.828160494484  |
| C  | 3.614729678719  | 2.890356134909  | 6.049108255974  | C  | 2.451332727808  | 3.015724477223  | 6.894590921305  |
| H  | 4.474241714458  | 3.558134997312  | 6.041828671622  | C  | 3.621579973617  | 2.888713008294  | 6.053456759285  |
| C  | 3.457974449785  | 1.738647255823  | 5.313893482506  | H  | 4.461889711574  | 3.579646081624  | 6.024613879815  |
| H  | 4.169236485558  | 1.311933379017  | 4.609220207349  | C  | 3.474028546541  | 1.737421486017  | 5.316044890863  |
| C  | 2.173133613639  | 1.170619564545  | 5.659411488024  | H  | 4.173029744263  | 1.333224944885  | 4.586684848290  |
| C  | 2.371125370112  | -0.751600326956 | 4.102136052679  | C  | 2.208757749977  | 1.147120661085  | 5.696409733454  |
| C  | 2.934342764071  | -2.015541310635 | 4.337426923965  | C  | 2.370309916420  | -0.759279109296 | 4.118196099527  |
| C  | 3.657364586446  | -2.703095587462 | 3.360716117616  | C  | 2.939053325492  | -2.022052751218 | 4.341180065404  |
| C  | 3.839546649129  | -2.124339706480 | 2.103123458015  | C  | 3.648140625778  | -2.700659190372 | 3.348401595479  |
| C  | 3.295420904173  | -0.866817658579 | 1.833988921538  | C  | 3.800245816572  | -2.116088952607 | 2.089204398796  |
| C  | 2.571658837421  | -0.202373535610 | 2.826087825408  | C  | 3.244347504234  | -0.860625732565 | 1.833647148731  |
| C  | 3.131722266717  | 5.201073927980  | 7.932441934923  | C  | 2.541097802058  | -0.200468021922 | 2.843059998408  |
| C  | 3.417887709897  | 6.074110457883  | 6.870240271432  | C  | 3.119485769194  | 5.192821011784  | 7.933183670203  |
| C  | 4.329088491381  | 7.124495056782  | 6.994529151133  | C  | 3.357828255806  | 6.060121880146  | 6.855605706748  |
| C  | 4.981043213595  | 7.332320257162  | 8.211674256530  | C  | 4.251793073368  | 7.128053128725  | 6.947725650937  |
| C  | 4.718126555933  | 6.486088909121  | 9.290849955689  | C  | 4.935549972705  | 7.353345993688  | 8.144567944342  |
| C  | 3.806269894584  | 5.439589886340  | 9.140922005383  | C  | 4.721194845596  | 6.509488017749  | 9.236371630297  |
| C  | -3.758674397497 | -1.662595983490 | 7.612633241904  | C  | 3.820834027179  | 5.448561048289  | 9.121784854047  |
| C  | -3.555406806106 | -2.990530306126 | 8.021910135389  | C  | -3.745560114119 | -1.652660329478 | 7.616057202370  |
| C  | -4.596621302320 | -3.918546569748 | 8.083421162335  | C  | -3.571277828288 | -2.983709726860 | 8.025095712633  |
| C  | -5.890970325340 | -3.527549130328 | 7.734778745845  | C  | -4.625760010692 | -3.898107925847 | 8.040961721625  |
| C  | -6.130653391406 | -2.214157542425 | 7.325695396673  | C  | -5.898605707668 | -3.488846306118 | 7.636914963132  |
| C  | -5.072393945122 | -1.305458180829 | 7.268009083257  | C  | -6.105549594123 | -2.171852751402 | 7.221282842985  |
| F  | 2.796423437124  | -2.597041297928 | 5.533806525311  | C  | -5.036029754861 | -1.274328145557 | 7.215224075002  |
| F  | 4.183413090243  | -3.901399791300 | 3.623529335713  | F  | 2.821910061941  | -2.605833339676 | 5.537231406067  |
| F  | 4.529813521337  | -2.769121018963 | 1.163935722944  | F  | 4.184288642160  | -3.896329788237 | 3.595671724477  |
| F  | 3.461212715164  | -0.314782327227 | 0.630022406189  | F  | 4.473449886132  | -2.753890139653 | 1.134953675880  |
| F  | 2.053784622342  | 0.992882653000  | 2.523454388920  | F  | 3.382505066006  | -0.304919213238 | 0.629338190110  |
| F  | 2.797503242125  | 5.926146653543  | 5.695011765248  | F  | 2.012430248447  | 0.993516711483  | 2.559984683994  |
| F  | 4.569320270934  | 7.938281744441  | 5.964460097684  | F  | 2.706235321835  | 5.888139205325  | 5.701840715771  |
| F  | 5.850447647987  | 8.332589394612  | 8.342377802842  | F  | 4.447453798332  | 7.939007422902  | 5.907499029324  |
| F  | 5.347938334218  | 6.674766831317  | 10.452192602013 | F  | 5.789555759091  | 8.368800223877  | 8.243597283921  |
| F  | 3.600835301698  | 4.639416564315  | 10.192315845593 | F  | 5.380321267349  | 6.717421850379  | 10.376719038892 |
| F  | -2.335907035272 | -3.400106255388 | 8.386591099672  | F  | 3.654676706230  | 4.653935757331  | 10.182810156616 |
| F  | -4.365976709580 | -5.170096493061 | 8.485162491498  | F  | -2.370097659597 | -3.405112300516 | 8.431077647560  |
| F  | -6.892422040046 | -4.403562676183 | 7.791546430394  | F  | -4.428143919704 | -5.153048293210 | 8.445888321737  |
| F  | -7.364448755035 | -1.840062346594 | 6.980970400988  | F  | -6.911292910939 | -4.351777564730 | 7.647712162155  |
| F  | -5.341466794621 | -0.064374598783 | 6.849287396009  | F  | -7.317783916856 | -1.782349127912 | 6.825283984547  |
| N  | 1.597719202853  | 1.997866921469  | 6.586508352064  | F  | -5.269216965652 | -0.028670494100 | 6.791871469781  |
| N  | 0.061244332806  | 3.117405850747  | 8.557444915069  | N  | 1.641539859421  | 1.943850457167  | 6.652506024349  |
| N  | -1.751510724806 | 1.422673651023  | 8.398158653537  | N  | 0.085364659934  | 3.092150022767  | 8.613098293112  |
| N  | -0.455618976344 | -0.130118678819 | 6.535575386994  | N  | -1.674791127840 | 1.348010520772  | 8.520263863683  |
| Mn | -0.062427953189 | 1.541846660536  | 7.463715955276  | N  | -0.420334352324 | -0.152156167957 | 6.586954196015  |
| O  | 0.733325265228  | 0.477193888740  | 8.578394148502  | Mn | 0.026341479512  | 1.448432448096  | 7.600390217459  |
| O  | -0.918474674283 | 2.437259505931  | 6.062864768967  | O  | 0.905107367708  | 0.572232922621  | 8.751191746450  |
| H  | -1.872416680655 | 2.270624267862  | 6.147799840046  | O  | -0.935319746898 | 2.409096717349  | 6.142774626271  |
|    |                 |                 |                 | H  | -1.838150850851 | 2.051935213600  | 6.149006121744  |

**Quintet [(TPFC)Mn<sup>VI</sup>(O)(OH)]<sup>-</sup>**

|   |                 |                 |                 |
|---|-----------------|-----------------|-----------------|
| C | 1.616360345772  | -0.047036847583 | 5.190898342076  |
| C | 0.377347636093  | -0.632137889945 | 5.585608312642  |
| C | -0.271934982650 | -1.791735885976 | 5.012715145405  |
| H | 0.102717861157  | -2.386129060291 | 4.181781705310  |
| C | -1.451266434373 | -1.974307145677 | 5.695890925493  |
| H | -2.199793675668 | -2.743522521934 | 5.515691895136  |
| C | -1.537249689547 | -0.929368974749 | 6.693188358653  |
| C | -2.611784207144 | -0.687712775577 | 7.612464356108  |
| C | -2.678621621627 | 0.422019474380  | 8.485155347961  |
| C | -3.692089066249 | 0.860000177115  | 9.422648541958  |
| H | -4.624740934004 | 0.343494323573  | 9.642834736196  |
| C | -3.257870629810 | 2.055996727096  | 9.972762479675  |
| H | -3.778826769318 | 2.665769780553  | 10.708785792513 |
| C | -1.977352321975 | 2.342360837301  | 9.382121171850  |
| C | -0.952898380727 | 3.366305085331  | 9.428992260446  |
| C | -0.709712609953 | 4.637213868639  | 10.060383042583 |
| H | -1.363001046012 | 5.139309396360  | 10.771825817716 |
| C | 0.504617503091  | 5.096496829074  | 9.574524875919  |

**[(TPFC)Mn<sup>VI</sup>(O)(OH)]**

|   |                 |                 |                 |
|---|-----------------|-----------------|-----------------|
| C | 1.598237236207  | -0.030229749063 | 5.159258393919  |
| C | 0.350626786876  | -0.606862859427 | 5.540652825225  |
| C | -0.293445984905 | -1.765762893311 | 4.976078231213  |
| H | 0.089309240935  | -2.366290610554 | 4.154055558608  |
| C | -1.478671459058 | -1.948057552318 | 5.653369266737  |
| H | -2.222751162468 | -2.720700822201 | 5.473191717452  |
| C | -1.577426642822 | -0.903281720784 | 6.640074233626  |
| C | -2.651057201984 | -0.665692216019 | 7.562685628947  |
| C | -2.718195547183 | 0.457459972452  | 8.414027490167  |
| C | -3.671268590128 | 0.840885378761  | 9.429939304008  |
| H | -4.562407302278 | 0.280714933687  | 9.706107657677  |
| C | -3.238716975138 | 2.034351907549  | 9.986869175392  |
| H | -3.718058849386 | 2.600826309767  | 10.782183205534 |
| C | -2.017927943375 | 2.378893613072  | 9.320734595151  |
| C | -0.984838522173 | 3.388115781537  | 9.328433178976  |
| C | -0.731723013300 | 4.643861454017  | 10.026385452615 |
| H | -1.381262365264 | 5.138956750981  | 10.744769208109 |



C 0.483916873480 5.099538426451 9.542054238184  
H 0.978973899674 6.032744548606 9.803425201759  
C 0.982403237868 4.117602476836 8.604210240946  
C 2.144884818276 4.082405474794 7.808849160344  
C 2.438404892222 3.030106776693 6.874808769307  
C 3.631165269027 2.865943222269 6.082652738487  
H 4.492502164565 3.530062675732 6.088113433536  
C 3.478889310343 1.714237773503 5.343915179541  
H 4.195582360618 1.284074244735 4.648038522076  
C 2.189961725272 1.159101845545 5.675497949459  
C 2.366407185599 -0.752060482676 4.105374865172  
C 2.900676039884 -2.028557303529 4.338057740708  
C 3.625224414106 -2.713154290525 3.361248695553  
C 3.825080546822 -2.121749121030 2.111465670069  
C 3.302728956720 -0.853113740988 1.847875255854  
C 2.585510912713 -0.184241982094 2.841052217952  
C 3.122781406642 5.193977057077 7.937621550862  
C 3.415914310861 6.039604572943 6.855499183717  
C 4.324796448078 7.092293631462 6.967124410159  
C 4.970290812905 7.318946491389 8.185353173923  
C 4.701696657206 6.944695352118 9.280698117064  
C 3.785456856169 5.450003713678 9.148843905999  
C -3.755024137620 -1.658708945356 7.615522727933  
C -3.523385900512 -2.989252099207 8.000466762841  
C -4.553571065217 -3.927985065768 8.065913448627  
C -5.856203631421 -3.545292465286 7.736001630910  
C -6.119076814210 -2.229976225326 7.345907632161  
C -5.075077834140 -1.305239772040 7.292592584211  
F 2.735442573530 -2.614442829388 5.526048281000  
F 4.129772063123 -3.919503566180 3.614454720711  
F 4.511792526480 -2.765696888034 1.173646291104  
F 3.487283422453 -0.293357684993 0.653447463396  
F 2.090063474446 1.022040844887 2.556165892816  
F 2.801316479642 5.860950139756 5.683973186886  
F 4.572068544441 7.885349970308 5.926173329239  
F 5.838305209839 8.318057946490 8.301759168382  
F 5.324523980803 6.704737486986 10.439045313355  
F 3.565121564309 4.671566972160 10.210569835798  
F -2.292984003551 -3.381066159551 8.338663158776  
F -4.305034936178 -5.179314955700 8.447795878165  
F -6.844101526475 -4.431702267886 7.793483389696  
F -7.359004360023 -1.868205034501 7.021332293624  
F -5.358585965663 -0.061592773039 6.899464521126  
N 1.607629195483 1.983653782595 6.602464531635  
N 0.056872161726 3.111244265850 8.563348630156  
N -1.756786101376 1.432139942921 8.387812078093  
N -0.461113277092 -0.123594870273 6.533243541306  
Mn -0.067327973693 1.537681118852 7.462160248996  
O 0.736574081847 0.522173860722 8.621734589932  
O -0.873350115496 2.461428795769 6.068379985195  
H -1.839935439062 2.369517434097 6.123798539904

I. [(TPFC)Mn<sup>III</sup>(OH)]<sup>-</sup>

B3LYP-optimized [(TPFC)Mn<sup>III</sup>(OH)]<sup>-</sup>

C 0.508229235882 -0.356998180339 4.363281179252  
C -0.731258614534 -0.738744146195 4.942505283354  
C -1.568000082412 -1.848107346456 4.546097862827  
H -1.362611260523 -2.538068382923 3.730074077487  
C -2.636501816528 -1.886738906917 5.408237985363  
H -3.445828517647 -2.614478104337 5.410747137443  
C -2.478022447058 -0.806409753490 6.352933613074  
C -3.317556993995 -0.518920345881 7.457409706996  
C -3.016850342473 0.482476751799 8.420361246788  
C -3.651020957381 0.848347478262 9.661193814695  
H -4.561400672293 0.410143155661 10.067127868242  
C -2.874580601981 1.838722763214 10.255869174325  
H -3.057594751846 2.325552558732 11.212749647870

C -1.775354161533 2.084786945631 9.377194215297  
C -0.580099150524 2.870336840102 9.334431048200  
C 0.115099101367 3.824973604840 10.138276978584  
H -0.214698205024 4.224755141141 11.096160299194  
C 1.295085226950 4.132965922957 9.466868639008  
H 2.069175354002 4.820941153839 9.803261331174  
C 1.323235212489 3.355053349845 8.254553955011  
C 2.302673885477 3.217184487494 7.233147359250  
C 2.180972840231 2.295362288569 6.164597459256  
C 3.161057738192 2.028398175785 5.138711434211  
H 4.126512655788 2.521590997231 5.042852324554  
C 2.663803274951 1.032974171602 4.333778577189  
H 3.152338301546 0.591251159048 3.467820039660  
C 1.368938598867 0.659422371795 4.854954360529  
N 1.109830175555 1.444664902373 5.950511718865  
N 0.173226653118 2.628322304692 8.217264390644  
N -1.911591723095 1.266311955514 8.288098280838  
N -1.313267886429 -0.133969935583 6.027326112145  
Mn -0.661110030336 1.553278596356 6.814466119909  
C 0.952584870732 -1.112019424446 3.154135901299  
C 2.048489527088 -1.986320884684 3.185302648234  
C 0.284458070625 -0.987041947733 1.927342961573  
C 2.467335941322 -2.696506538120 2.059002616694  
C 0.679872577054 -1.689945066056 0.788251740582  
C 1.778431293043 -2.547875920175 0.854615944123  
C -4.551354195103 -1.334497181633 7.642818713627  
C -4.702228410917 -2.211518333580 8.726938750858  
C -5.624184495497 -1.256830179779 6.742401667184  
C -5.857837264962 -2.971810532307 8.913084313696  
C -6.788064175395 -2.009598828860 6.905095636539  
C -6.905646784975 -2.870351602034 7.997179096063  
C 3.526437656777 4.064765332385 7.308002285729  
C 4.464298337958 3.918196046937 8.340507876819  
C 3.790339768006 5.060360599300 6.355662251165  
C 5.605209821934 4.717455565562 8.428271037878  
C 4.926037760656 5.869043363759 6.419448122783  
C 5.836779714632 5.697997107748 7.462824551671  
F 6.921186811790 6.464554224056 7.535645325326  
F 6.477430608940 4.544348781825 9.420936656209  
F 4.290769967459 2.980744901805 9.275629070622  
F 5.140199343088 6.808633689755 5.498900399236  
F 2.936886381708 5.267281772289 5.349758917443  
F -5.557494086721 -0.435752682062 5.691651631508  
F -7.789151134548 -1.905262561119 6.031598059738  
F -8.010664565743 -3.591549265605 8.163483481335  
F -5.962402130256 -3.799963088306 9.952046999349  
F -3.716560838216 -2.354087864956 9.616583592007  
F 2.726666789625 -2.169249363378 4.321378478097  
F 3.512160404565 -3.521440960247 2.128441462832  
F 2.166594893142 -3.221334585781 -0.224901275274  
F 0.022408737549 -1.541177082359 -0.361739481740  
F -0.765519057850 -0.169074864460 1.818613868896  
O -1.537026511230 2.877582962944 5.679398271104  
H -0.899757670965 3.543825654921 5.386393296908

TPSSH-optimized [(TPFC)Mn<sup>III</sup>(OH)]<sup>-</sup>

C 0.508891604160 -0.356939774001 4.368475139485  
C -0.731049542806 -0.739210109455 4.946484082194  
C -1.567409477860 -1.844969802911 4.546822320232  
H -1.360314133548 -2.531900758727 3.728326700148  
C -2.637209603222 -1.884131272852 5.410086512414  
H -3.449215776833 -2.609179925555 5.413445645531  
C -2.475050440144 -0.807934245621 6.356094860425  
C -3.314043132305 -0.521664994176 7.462546099290  
C -3.007423662393 0.471528169929 8.431086515095  
C -3.648496689152 0.843469319667 9.665264055298  
H -4.566959144745 0.413198359214 10.061600098441  
C -2.868325319260 1.827247024614 10.266455042806

|    |                 |                 |                 |    |                 |                 |                 |
|----|-----------------|-----------------|-----------------|----|-----------------|-----------------|-----------------|
| H  | -3.055214127479 | 2.317918025683  | 11.220274053546 | C  | -2.884944391108 | 1.839731923752  | 10.276685382729 |
| C  | -1.759820927698 | 2.062873149348  | 9.397327046741  | H  | -3.075161822379 | 2.337951757878  | 11.235804090706 |
| C  | -0.564054729690 | 2.845532332657  | 9.356469047239  | C  | -1.769032226334 | 2.073145737650  | 9.404646727452  |
| C  | 0.124241786227  | 3.811877389236  | 10.151617747371 | C  | -0.569825827104 | 2.857912864580  | 9.363733998128  |
| H  | -0.209316307600 | 4.217581411629  | 11.105359294227 | C  | 0.119095823362  | 3.832637880349  | 10.160949991657 |
| C  | 1.300675172626  | 4.124073164761  | 9.475628199705  | H  | -0.219640118144 | 4.244486246743  | 11.120096405821 |
| H  | 2.070197166604  | 4.821526889485  | 9.803170771512  | C  | 1.302323816587  | 4.146398753728  | 9.481124115561  |
| C  | 1.333144546347  | 3.337260235907  | 8.270435545784  | H  | 2.076908010835  | 4.851687943546  | 9.808497215602  |
| C  | 2.306687967192  | 3.208897274158  | 7.243225407316  | C  | 1.336999203082  | 3.351957541879  | 8.272078269887  |
| C  | 2.183375103846  | 2.289712525842  | 6.171269476019  | C  | 2.318447440043  | 3.224071558756  | 7.244601661264  |
| C  | 3.159780008632  | 2.030029565653  | 5.142819203538  | C  | 2.194012994326  | 2.298636914719  | 6.168203866549  |
| H  | 4.123291381128  | 2.527561112658  | 5.047574889908  | C  | 3.175069538430  | 2.037027810512  | 5.136510068524  |
| C  | 2.660854984541  | 1.035181849159  | 4.335049805126  | H  | 4.146569727115  | 2.537785310909  | 5.041406749161  |
| H  | 3.144495657830  | 0.595864820192  | 3.464782004348  | C  | 2.671167436258  | 1.036797533073  | 4.323385996754  |
| C  | 1.371277038907  | 0.658019588891  | 4.860560879633  | H  | 3.157396115857  | 0.593165132234  | 3.446024756110  |
| N  | 1.11916486895   | 1.437604363536  | 5.962378335771  | C  | 1.375871206521  | 0.659321202877  | 0.659321202877  |
| N  | 0.190591709188  | 2.594494747523  | 8.239516254854  | N  | 1.114340699507  | 1.444072036959  | 5.959392663185  |
| N  | -1.889623423649 | 1.242591761593  | 8.305850429173  | N  | 0.189655678817  | 2.601288327879  | 8.240304222294  |
| N  | -1.308801259854 | -0.134905767512 | 6.036079714695  | N  | -1.895753403898 | 1.245552035648  | 8.307082921124  |
| Mn | -0.642055031340 | 1.526866518263  | 6.842767476563  | N  | -1.312940008338 | -0.140073432874 | 6.037516502495  |
| C  | 0.950593515364  | -1.108764767204 | 3.159347259823  | Mn | -0.642019540574 | 1.525301317318  | 6.845211133799  |
| C  | 2.057860167051  | -1.970652304845 | 3.183135101444  | C  | 0.954522434307  | -1.115711146030 | 3.144312531666  |
| C  | 0.268875587491  | -0.996338971898 | 1.937614447999  | C  | 2.063550624330  | -1.988888350039 | 3.171588809773  |
| C  | 2.475072549595  | -2.679832994050 | 2.054945109101  | C  | 0.273070307678  | -0.993682210298 | 1.913710347231  |
| C  | 0.661957304590  | -1.698640770588 | 0.796697596523  | C  | 2.484260404060  | -2.701531156418 | 2.035358115022  |
| C  | 1.772243538115  | -2.543357521588 | 0.856125518353  | C  | 0.668783418556  | -1.699585804894 | 0.764522997118  |
| C  | -4.551704377351 | -1.329247962220 | 7.637793981262  | C  | 1.781736406435  | -2.556259487472 | 0.826367119453  |
| C  | -4.720902121783 | -2.199206048032 | 8.726252199271  | C  | -4.570732035352 | -1.339629966042 | 7.647542162808  |
| C  | -5.613107961023 | -1.253523565283 | 6.722014851935  | C  | -4.733800338195 | -2.219070308977 | 8.740046269085  |
| C  | -5.882290365235 | -2.954106116743 | 8.902087960345  | C  | -5.642597472004 | -1.256231444960 | 6.731879943368  |
| C  | -6.782486100368 | -2.001016776193 | 6.873750138696  | C  | -5.902943165570 | -2.978172079070 | 8.920724856588  |
| C  | -6.917766159040 | -2.854357298828 | 7.970697916534  | C  | -6.819964650149 | -2.007789441566 | 6.887826998806  |
| C  | 3.522870557178  | 4.064027614905  | 7.307437819350  | C  | -6.950416626689 | -2.871582312283 | 7.989268092285  |
| C  | 4.462409278958  | 3.938350706736  | 8.342609749411  | C  | 3.538026473458  | 4.080416087922  | 7.313135116670  |
| C  | 3.781205937659  | 5.048149555808  | 6.340088172080  | C  | 4.484858661458  | 3.941770155183  | 8.351339714761  |
| C  | 5.599129153242  | 4.745691200449  | 8.418550759560  | C  | 3.793784914465  | 5.079406441307  | 6.348263682912  |
| C  | 4.912595128919  | 5.864556381099  | 6.391424847410  | C  | 5.629751264839  | 4.753157683834  | 8.432983502126  |
| C  | 5.824801617733  | 5.713610938055  | 7.437775437602  | C  | 4.933332883345  | 5.900177271565  | 6.404652955366  |
| F  | 6.906454809035  | 6.488407008366  | 7.499166355113  | C  | 5.854111249419  | 5.737136013059  | 7.454346186475  |
| F  | 6.474777139584  | 4.591240532842  | 9.413924058905  | F  | 6.941582902761  | 6.514775948839  | 7.520706198472  |
| F  | 4.294843093663  | 3.010098934461  | 9.290784426168  | F  | 6.513353795026  | 4.588074282711  | 9.428228921825  |
| F  | 5.120929033255  | 6.794383610819  | 5.456877105732  | F  | 4.319199000702  | 2.997364076027  | 9.293054685460  |
| F  | 2.923069670306  | 5.237118676806  | 5.331946259693  | F  | 5.140979912869  | 6.8444335373590 | 5.475257708083  |
| F  | -5.529339215448 | -0.435942000674 | 5.667221299968  | F  | 2.926269738709  | 5.281231513902  | 5.342049536420  |
| F  | -7.773689621197 | -1.897567092081 | 5.985981386966  | F  | -5.563810503426 | -0.427006351418 | 5.677592771673  |
| F  | -8.029326912826 | -3.571293497149 | 8.127144764294  | F  | -7.821906711586 | -1.898302745558 | 6.003214061699  |
| F  | -6.003861964980 | -3.777482431560 | 9.945509024834  | F  | -8.067641339590 | -3.591100488609 | 8.149742870776  |
| F  | -3.744588927836 | -2.341592659529 | 9.629141464905  | F  | -6.020918731242 | -3.810897019164 | 9.965325147551  |
| F  | 2.747129379677  | -2.143415375123 | 4.316467286570  | F  | -3.745844192592 | -2.369123557029 | 9.638644770511  |
| F  | 3.530900392421  | -3.494445185579 | 2.117289495616  | F  | 2.748077387494  | -2.172331656064 | 4.313842815035  |
| F  | 2.158891804149  | -3.216862185621 | -0.226308401440 | F  | 3.539577911534  | -3.527251197170 | 2.098850987997  |
| F  | -0.007950407569 | -1.561118781526 | -0.349791441397 | F  | 2.170719217699  | -3.231932305517 | -0.262118689446 |
| F  | -0.792153705029 | -0.188423038792 | 1.836725583513  | F  | 0.002168563791  | -1.553766144202 | -0.390377981337 |
| O  | -1.508119870151 | 2.863330563144  | 5.729978077562  | F  | -0.785403130783 | -0.172002079098 | 1.810354261949  |
| H  | -0.844841838574 | 3.495111919789  | 5.408319843220  | O  | -1.497482519875 | 2.847017802638  | 5.711264957829  |
|    |                 |                 |                 | H  | -0.811727776256 | 3.446138992537  | 5.355143323940  |

**BP86-optimized [(TPFC)Mn<sup>III</sup>(OH)]<sup>-</sup>**

|   |                 |                 |                 |
|---|-----------------|-----------------|-----------------|
| C | 0.511793784503  | -0.362903236934 | 4.356961022010  |
| C | -0.732810876199 | -0.747811007283 | 4.941035844833  |
| C | -1.569575931764 | -1.861718301819 | 4.541914162283  |
| H | -1.357885834200 | -2.555025871903 | 3.718536996613  |
| C | -2.645358007243 | -1.903525825951 | 5.411585799040  |
| H | -3.462246650421 | -2.635896131667 | 5.417634882653  |
| C | -2.483682453450 | -0.820410898505 | 6.358913157249  |
| C | -3.329950515960 | -0.530736995140 | 7.468601224001  |
| C | -3.021328409760 | 0.471147373522  | 8.435336935554  |
| C | -3.668540123914 | 0.848879630918  | 9.673339856649  |
| H | -4.595965619956 | 0.416853595375  | 10.070457602503 |

**<sup>3</sup>RC**

|   |                 |                 |                |
|---|-----------------|-----------------|----------------|
| C | 1.328486171453  | -0.381493786017 | 5.101642061844 |
| C | 0.020140143334  | -0.857566780585 | 5.384207112144 |
| C | -0.668400522918 | -1.957197309965 | 4.750504206188 |
| H | -0.268797650231 | -2.575795624258 | 3.949251410538 |
| C | -1.910113384646 | -2.059706749842 | 5.333142070703 |
| H | -2.690481889927 | -2.776887547405 | 5.085580457898 |
| C | -2.011204699797 | -1.029290035439 | 6.337647203529 |
| C | -3.116862316463 | -0.754265160024 | 7.179197992852 |
| C | -3.139965043188 | 0.324965915144  | 8.104267086863 |

C -4.114118966235 0.729277816506 9.082671244686  
H -5.067160278196 0.236597287653 9.269133265155  
C -3.613535014837 1.844419356329 9.751253692522  
H -4.095885768558 2.394333411942 10.557364611793  
C -2.332891715184 2.123492464833 9.190012490666  
C -1.242736645645 3.030113704826 9.364763310802  
C -0.896070331942 4.176941277672 10.142828497969  
H -1.520181574444 4.657806647368 10.893974738467  
C 0.385251675063 4.555221994636 9.753013435483  
H 0.957889305309 5.397396439646 10.138375784821  
C 0.827449758562 3.632586040311 8.737829266404  
C 2.042005336258 3.535309750414 8.004684962731  
C 2.283907326896 2.529708714034 7.035922792803  
C 3.504153074858 2.298106199637 6.304593375563  
H 4.416270071011 2.884241504117 6.400175404450  
C 3.308872354043 1.201042673382 5.496896192427  
H 4.034925439062 0.746253022088 4.825762730565  
C 1.960874568463 0.734502708409 5.712957462367  
C 2.110700258819 -1.119937750694 4.069454913911  
C 2.553432766710 -2.434928541755 4.279965048258  
C 3.283945151124 -3.137497266576 3.319574576637  
C 3.596537312185 -2.522337057604 2.105584264957  
C 3.174482641415 -1.213552850462 1.862809071788  
C 2.441259764182 -0.534198156125 2.837657848659  
C 3.114005189923 4.530195172878 8.276461184370  
C 3.537623018747 5.444370177154 7.298462502356  
C 4.539692852036 6.385164356860 7.543462867901  
C 5.146022358981 6.436038979310 8.800330063491  
C 4.747689831984 5.543898154772 9.797991207187  
C 3.745492244082 4.610415921954 9.527638827640  
C -4.309134514027 -1.639233839287 7.103317390097  
C -4.246676498533 -2.997929099241 7.452735158648  
C -5.363513041209 -3.833623426546 7.393469328817  
C -6.593078520204 -3.314501065771 6.983059024987  
C -6.693208884211 -1.966540210502 6.632560528722  
C -5.561291822791 -1.151816154772 6.695608641373  
F 2.286539754000 -3.053289681253 5.435178717574  
F 3.693458717627 -4.385373362086 3.557226012600  
F 4.295064707887 -3.181395003951 1.182730949665  
F 3.465342199859 -0.626334397628 0.700058040302  
F 2.043225873848 0.712371239424 2.562285530795  
F 2.969099044619 5.441595808638 6.088374286936  
F 4.911543121175 7.242577116665 6.591069524468  
F 6.101194048015 7.330649993604 9.046044910030  
F 5.332371723189 5.582551590265 10.996728541483  
F 3.407080759894 3.761673845068 10.505229086345  
F -3.094374610875 -3.529985513464 7.873109818622  
F -5.267003626319 -5.118854419855 7.739374676277  
F -7.665450958201 -4.101911902382 6.925196269556  
F -7.864410486728 -1.469578001782 6.229890741979  
F -5.695262765285 0.128125801281 6.332284481396  
N 1.380960512976 1.557610839318 6.646862752609  
N -0.183824195275 2.743723926080 8.544489091028  
N -2.097433561474 1.196777358757 8.203309266025  
N -0.821506509705 -0.330235693865 6.329920583789  
Mn -0.424116954900 1.305032807047 7.281031452070  
O 0.425382847554 0.141660356748 8.706039554727  
O -0.224038442260 -0.875934269029 9.138828479960  
O -1.103530671658 2.382227212970 5.934889636407  
H -2.068063841108 2.258632033212 5.914957982674  
C 2.658361792130 -1.903178427638 11.235707465500  
O 2.551551280066 -1.557360083916 12.624727355982  
C 3.053931992545 -0.233358788444 12.839094475449  
C 3.237730081460 0.380823310600 11.450518926205  
C 3.582070772807 -0.855799862438 10.612948955825  
H 3.047512018830 -2.931708391543 11.157278644425  
H 1.658512611708 -1.869251211678 10.764697122311  
H 2.340795585633 0.323575410636 13.469528280742  
H 4.017725132971 -0.286507929531 13.382055386358

H 2.292521605124 0.821179182422 11.094553309361  
H 4.008918450355 1.164091847165 11.426297433872  
H 3.400461776775 -0.717856472677 9.537210282369  
H 4.639297491427 -1.135682235742 10.754761502253

<sup>3</sup>TS1

C 1.413913783522 -0.136550354658 4.858154553872  
C 0.170804479959 -0.717357122589 5.234743311313  
C -0.511105583526 -1.823952655450 4.603698269928  
H -0.165119038636 -2.361078226912 3.722555958934  
C -1.669308526845 -2.056397667489 5.310283960893  
H -2.420500807802 -2.815516882363 5.099737582036  
C -1.725659436908 -1.099537381169 6.389243285916  
C -2.735094574605 -0.959955494060 7.375264013304  
C -2.704305848253 0.036321516197 8.389674238704  
C -3.635078636795 0.360854321696 9.442071332722  
H -4.567039260417 -0.162845510187 9.649700614527  
C -3.130048004516 1.458289982231 10.133439941807  
H -3.586973590857 1.963537649495 10.982681759691  
C -1.889359566375 1.801756953296 9.512566475916  
C -0.855685744064 2.783224117796 9.618494295398  
C -0.496799719743 3.901086163841 10.432357774154  
H -1.063946809039 4.292961411885 11.275002668558  
C 0.713707257647 4.383267223672 9.942461244580  
H 1.275464773218 5.233883192276 10.325765936523  
C 1.099656308804 3.554395248958 8.827738193888  
C 2.237588202563 3.583947186618 7.974100142786  
C 2.433067874407 2.671640371978 6.905820110398  
C 3.566503816209 2.585995356528 6.014826189959  
H 4.444567056861 3.228581754373 6.046393100970  
C 3.336696870605 1.545168985931 5.145026845762  
H 3.995597360155 1.200651525929 4.350154324377  
C 2.055093893743 0.968137306800 5.484791309653  
C 2.111994276910 -0.743663113977 3.688551870239  
C 2.652856483837 -2.037575602805 3.741210594833  
C 3.304702898055 -2.618346983872 2.651409334949  
C 3.436013743215 -1.897300432347 1.462868472435  
C 2.913072913777 -0.60559735059 1.375078676437  
C 2.260648528555 -0.050102616044 2.477516797846  
C 3.278994165010 4.615334410215 8.226954226280  
C 3.560432467124 5.628635118325 7.296722199278  
C 4.533225836371 6.603107499741 7.527995465648  
C 5.253602816209 6.588632147503 8.724029844892  
C 4.998068893402 5.597579560430 9.674016269611  
C 4.023978032732 4.631068427236 9.417025808336  
C -3.889968598004 -1.897617936384 7.343563181641  
C -3.733722225867 -3.270953145356 7.589640952805  
C -4.811198593209 -4.158721692752 7.569593482068  
C -6.095399524036 -3.679015572676 7.304554663999  
C -6.288710443266 -2.318240550121 7.058474115531  
C -5.194329669615 -1.451446462612 7.078514806513  
F 2.560951248895 -2.755427728339 4.866002194762  
F 3.811157521384 -3.850296418378 2.740736031189  
F 4.058026311537 -2.439459751393 0.416933167772  
F 3.030246464779 0.083050216927 0.237427404654  
F 1.760642202990 1.183625717672 2.347844112018  
F 2.877626382429 5.692206422378 6.148640499177  
F 4.768256184776 7.554713042007 6.622220819021  
F 6.181935290679 7.514845030593 8.957104427897  
F 5.692537706773 5.574176598335 10.813435513148  
F 3.827066609652 3.687674906367 10.346040298227  
F -2.523790371526 -3.768353214345 7.867314114807  
F -4.624150239280 -5.457427640654 7.814414516511  
F -7.131428599485 -4.515995648882 7.285432687922  
F -7.513379781760 -1.857981803832 6.794223602633  
F -5.420202548283 -0.159410304968 6.817026166593  
N 1.556358868669 1.672561720379 6.547954832363

N 0.119269303833 2.624115895076 8.670231478156  
 N -1.669978496758 0.913302155308 8.495049310253  
 N -0.602343053231 -0.307621395575 6.289784810908  
 Mn -0.117996943803 1.200091781220 7.399624438434  
 O 1.004284761711 0.028326174961 8.405084431103  
 O 0.410267474701 -1.051550977213 9.037315705105  
 O -1.063386930621 2.325568540296 6.252627460834  
 H -1.509414391415 1.751027607694 5.608377266916  
 O 0.578972298729 -0.645406156299 11.576202527396  
 C 1.219475013356 0.562218494575 11.773485773153  
 C 2.643112736184 0.346883950137 11.916418687647  
 C 2.874230152075 -1.126655595877 11.577082949782  
 C 1.526705856952 -1.760308952240 11.956741484187  
 H -0.453637635123 -0.622465545399 11.951728220228  
 H 0.415141451413 -0.807570419004 10.157236373666  
 H 3.165940546125 1.051568820289 11.254578900297  
 H 2.909203499746 0.579275386606 12.961734305274  
 H 3.047708524596 -1.244734045176 10.496771901874  
 H 3.730236925180 -1.552497664993 12.118830400714  
 H 1.320434207216 -2.700582298625 11.424833308429  
 H 1.475254796396 -1.966021643694 13.042932507038

<sup>3</sup>IM1

C 1.444867953784 -0.178673968012 4.902907129637  
 C 0.198088124119 -0.756273323056 5.272352232254  
 C -0.501068144602 -1.833931255480 4.607409914898  
 H -0.160234877838 -2.353242258921 3.713640051166  
 C -1.668598921974 -2.058501156056 5.298926066504  
 H -2.436700068112 -2.792961169082 5.063250392778  
 C -1.709764757597 -1.126888918936 6.402438944536  
 C -2.728335565938 -0.982627554349 7.377539582898  
 C -2.697717574655 0.011153613134 8.394595384264  
 C -3.604139592413 0.305778664391 9.473501522231  
 H -4.522824631110 -0.235185409757 9.695588063710  
 C -3.093173992802 1.393529311545 10.178154188626  
 H -3.532383175421 1.870792348341 11.052465080506  
 C -1.873052357848 1.764425570661 9.538643450012  
 C -0.825700846236 2.727518062967 9.669779024000  
 C -0.480221541588 3.855648480310 10.477862213560  
 H -1.057689959160 4.252252071233 11.311195347672  
 C 0.727136555675 4.344237820221 9.989044850459  
 H 1.277676279501 5.206031319864 10.363443666272  
 C 1.124616016845 3.507186436550 8.882622746396  
 C 2.257126580258 3.546698393328 8.022025186374  
 C 2.452620146322 2.635459115641 6.953300112642  
 C 3.597553430925 2.534637604984 6.081695375420  
 H 4.481454566750 3.168430249092 6.125525538056  
 C 3.373989936671 1.489220591184 5.214473839018  
 H 4.045390208089 1.132942048126 4.435397263198  
 C 2.083572011417 0.924672892439 5.533714002948  
 C 2.150298050686 -0.789306490700 3.740098960133  
 C 2.667032462638 -2.093336915337 3.792864859119  
 C 3.325425098017 -2.679052321572 2.709785539637  
 C 3.488252561395 -1.953411368562 1.527941439911  
 C 2.989655638056 -0.652127991045 1.440107068245  
 C 2.330046740002 -0.091407560437 2.535593864362  
 C 3.288509489036 4.590164491473 8.263484568501  
 C 3.560924696631 5.592914739194 7.318725146180  
 C 4.521281190184 6.582270622574 7.537917341113  
 C 5.239015552051 6.593887667078 8.735573360993  
 C 4.992301199653 5.614362348951 9.699701327910  
 C 4.030886298167 4.632140300242 9.454666554216  
 C -3.888526833558 -1.911778597746 7.337135235706  
 C -3.739567369767 -3.291423247859 7.552791531547  
 C -4.823481565916 -4.171057206700 7.525682771507  
 C -6.107087289861 -3.677447889324 7.284358015810  
 C -6.293417479572 -2.310515321836 7.068811243289

C -5.193057870374 -1.451684552216 7.095747174409  
 F 2.546029255572 -2.815854995482 4.911858780525  
 F 3.808818507491 -3.920196278149 2.799516029233  
 F 4.116853397138 -2.500386190866 0.48849839384  
 F 3.136241679164 0.040769735564 0.308472994971  
 F 1.852545726065 1.151053094443 2.404655752639  
 F 2.879734729650 5.632490265551 6.168712288476  
 F 4.747091464852 7.523111579215 6.618739272292  
 F 6.155892250198 7.534161095076 8.956970021980  
 F 5.684651336474 5.615425722948 10.840581802532  
 F 3.845932324748 3.698799527115 10.396022853837  
 F -2.531209695270 -3.803288024353 7.809895569603  
 F -4.643030633208 -5.475648386023 7.742447342888  
 F -7.148970804398 -4.506887120912 7.258775840580  
 F -7.517388483626 -1.836640298127 6.826336575493  
 F -5.412992446742 -0.15327868826 6.862259037401  
 N 1.568550230468 1.644283744407 6.581566354058  
 N 0.161441561448 2.559547984567 8.739041378378  
 N -1.677724628690 0.910593326726 8.481748962745  
 N -0.566370082308 -0.366310815768 6.337717878433  
 Mn -0.092624398735 1.159234487005 7.431138053741  
 O 0.987760386140 0.000916982851 8.494256194515  
 O 0.316891778513 -1.156725458457 9.000679655332  
 O -0.994696026623 2.302192704897 6.267034698416  
 H -1.944958548245 2.133806899971 6.383993565308  
 C 0.552336390138 -0.837144082511 11.950855344082  
 O 0.834998584952 0.463368927398 12.279381415487  
 C 2.269340551621 0.662778209163 12.256249025812  
 C 2.838623329850 -0.563324356872 11.542509763470  
 C 1.812330730925 -1.651972617717 11.901916441609  
 H -0.416828462702 -1.185576559665 12.323603122187  
 H 0.221137345962 -0.928704424536 9.963548558137  
 H 2.474672831555 1.615845231482 11.750113588795  
 H 2.613020555454 0.732788253091 13.302572126814  
 H 2.834242038692 -0.396702931405 10.454663955918  
 H 3.862565342341 -0.798605499076 11.864896851078  
 H 1.769264398052 -2.467372046034 11.164208931797  
 H 2.041444892555 -2.106174553232 12.887917299433

<sup>3</sup>IM2

C 1.413913783522 -0.136550354658 4.858154553872  
 C 0.170804479959 -0.717357122589 5.234743311313  
 C -0.511105583526 -1.823952655450 4.603698269928  
 H -0.165119038636 -2.361078226912 3.722555958934  
 C -1.669308526845 -2.056397667489 5.310283960893  
 H -2.420500807802 -2.815516882363 5.099737582036  
 C -1.725659436908 -1.099537381169 6.389243285916  
 C -2.735094574605 -0.959955494060 7.375264013304  
 C -2.704305848253 0.036321516197 8.389674238704  
 C -3.635078636795 0.360854321696 9.442071332722  
 H -4.567039260417 -0.162845510187 9.649700614527  
 C -3.130048004516 1.458289982231 10.133439941807  
 H -3.586973590857 1.963537649495 10.982681759691  
 C -1.889359566375 1.801756953296 9.512566475916  
 C -0.855685744064 2.783224117796 9.618494295398  
 C -0.496799719743 3.901086163841 10.432357774154  
 H -1.063946809039 4.292961411885 11.275002668558  
 C 0.713707257647 4.383267223672 9.942461244580  
 H 1.275464773218 5.233883192276 10.325765936523  
 C 1.099656308804 3.554395248958 8.827738193888  
 C 2.237588202563 3.583947186618 7.974100142786  
 C 2.433067874407 2.671640371978 6.905820110398  
 C 3.566503816209 2.585995356528 6.014826189959  
 H 4.444567056861 3.228581754373 6.046393100970  
 C 3.336696870605 1.545168985931 5.145026845762  
 H 3.995597360155 1.200651525929 4.350154324377  
 C 2.055093893743 0.968137306800 5.484791309653  
 C 2.111994276910 -0.743663113977 3.688551870239

C 2.652856483837 -2.037575602805 3.741210594833  
 C 3.304702898055 -2.618346983872 2.651409334949  
 C 3.436013743215 -1.897300432347 1.462868472435  
 C 2.913072913777 -0.605599735059 1.375078676437  
 C 2.260648528555 -0.050102616044 2.477516797846  
 C 3.278994165010 4.615334410215 8.226954226280  
 C 3.560432467124 5.628635118325 7.296722199278  
 C 4.533225836371 6.603107499741 7.527995465648  
 C 5.253602816209 6.588632147503 8.724029844892  
 C 4.998068893402 5.597579560430 9.674016269611  
 C 4.023978032732 4.631068427236 9.417025808336  
 C -3.889968598004 -1.897617936384 7.343563181641  
 C -3.733722225867 -3.270953145356 7.589640952805  
 C -4.811198593209 -4.158721692752 7.569593482068  
 C -6.095399524036 -3.679015572676 7.304554663999  
 C -6.288710443266 -2.318240550121 7.058474115531  
 C -5.194329669615 -1.451446462612 7.078514806513  
 F 2.560951248895 -2.755427728339 4.866002194762  
 F 3.811157521384 -3.850296418378 2.740736031189  
 F 4.058026311537 -2.439459751393 0.416933167772  
 F 3.030246464779 0.083050216927 0.237427404654  
 F 1.760642202990 1.183625717672 2.347844112018  
 F 2.877626382429 5.692206422378 6.148640499177  
 F 4.768256184776 7.554713042007 6.622220819021  
 F 6.181935290679 7.514845030593 8.957104427897  
 F 5.692537706773 5.574176598335 10.813435513148  
 F 3.827066609652 3.687674906367 10.346040298227  
 F -2.523790371526 -3.768353214345 7.867314114807  
 F -4.624150239280 -5.457427640654 7.814414516511  
 F -7.131428599485 -4.515995648882 7.285432687922  
 F -7.513379781760 -1.857981803832 6.794223602633  
 F -5.420202548283 -0.159410304968 6.817026166593  
 N 1.556358868669 1.672561720379 6.547954832363  
 N 0.119269303833 2.624115895076 8.670231478156  
 N -1.669978496758 0.913302155308 8.495049310253  
 N -0.602343053231 -0.307621395575 6.289784810908  
 Mn -0.117996943803 1.200091781220 7.399624438434  
 O 1.004284761711 0.028326174961 8.405084431103  
 O 0.410267474701 -1.051550977213 9.037315705105  
 O -1.063386930621 2.325568540296 6.252627460834  
 H -1.509414391415 1.751027607694 5.608377266916  
 C 0.578972298729 -0.645406156299 11.576202527396  
 O 1.219475013356 0.562218494575 11.773485773153  
 C 2.643112736184 0.346883950137 11.916418687647  
 C 2.874230152075 -1.126655595877 11.577082949782  
 C 1.526705856952 -1.760308952240 11.956741484187  
 H -0.453637635123 -0.622465545399 11.951728220228  
 H 0.415141451413 -0.807570419004 10.157236373666  
 H 3.165940546125 1.051568820289 11.254578900297  
 H 2.909203499746 0.579275386606 12.961734305274  
 H 3.047708524596 -1.244734045176 10.496771901874  
 H 3.730236925180 -1.552497664993 12.118830400714  
 H 1.320434207216 -2.700582298625 11.424833308429  
 H 1.475254796396 -1.966021643694 13.042932507038

<sup>3</sup>TS3

C 1.449745511728 -0.281910249248 5.079356770642  
 C 0.190414754567 -0.851274870300 5.426694950506  
 C -0.495515988161 -1.952341089369 4.779381689067  
 H -0.137606172890 -2.508252309227 3.914210935470  
 C -1.684122814829 -2.141952342274 5.445818569238  
 H -2.449619470870 -2.881564809823 5.216385922831  
 C -1.744062527655 -1.165728811640 6.514999922327  
 C -2.794144479601 -0.979521310068 7.457753821544  
 C -2.776472372694 -0.009807298355 8.502187583828  
 C -3.804226995768 0.477992984404 9.374189380271  
 H -4.828388133350 0.110801715876 9.424323347164  
 C -3.270180544947 1.537469123099 10.115935372414

H -3.801826374507 2.150333306528 10.842787844166  
 C -1.916820217420 1.693958349580 9.711162358175  
 C -0.848936390081 2.641131306938 9.842479271236  
 C -0.546802660462 3.823415074197 10.593416090418  
 H -1.150571824696 4.256739790934 11.389758914057  
 C 0.662069760404 4.309243652179 10.104745587435  
 H 1.187754050399 5.200442500910 10.445868434900  
 C 1.094520548851 3.416852843159 9.054737646019  
 C 2.219241503926 3.461882636202 8.179639696972  
 C 2.436520617584 2.534092344443 7.125959182506  
 C 3.564618030829 2.477889681296 6.221093180866  
 H 4.425668472546 3.144278807901 6.237883155637  
 C 3.352707044744 1.428277749347 5.358226026975  
 H 4.007726365320 1.106388852056 4.550358010610  
 C 2.089010915039 0.818311773220 5.720287692578  
 C 2.159103286241 -0.887871028292 3.914913624908  
 C 2.697526940474 -2.182471559769 3.971978834914  
 C 3.356607813716 -2.766034835867 2.887921922370  
 C 3.497485254239 -2.047328213644 1.699178096145  
 C 2.976375906764 -0.755343082962 1.606103721403  
 C 2.316307571555 -0.197806080847 2.703053633209  
 C 3.205159650083 4.560497715016 8.368072081081  
 C 3.414755669516 5.544388805889 7.387695312600  
 C 4.330099303156 6.584893035999 7.557449613415  
 C 5.066110965617 6.670759967919 8.740767470051  
 C 4.880877485074 5.713723367441 9.740291887009  
 C 3.962715211681 4.680303173700 9.544268059457  
 C -4.011259170170 -1.829675046783 7.31922852484  
 C -3.985589546230 -3.200488018243 7.616930582203  
 C -5.116206953106 -4.011088593931 7.497378617656  
 C -6.323642445790 -3.451038394413 7.075436134346  
 C -6.386766225831 -2.089462279187 6.772900202069  
 C -5.239669295871 -1.302103512880 6.894374135027  
 F 2.596279502053 -2.899892908566 5.096941587974  
 F 3.860642796023 -3.999083430590 2.982750469846  
 F 4.126598135500 -2.591937523733 0.658124457690  
 F 3.101707478320 -0.068550828135 0.467665731208  
 F 1.816632714322 1.035728357799 2.565578076727  
 F 2.712880114703 5.517562292413 6.249313407035  
 F 4.494969583114 7.504938447867 6.604163659199  
 F 5.940829066078 7.660539911365 8.915198225630  
 F 5.589869497835 5.785619307000 10.869250783938  
 F 3.836496228930 3.774519339885 10.522188857082  
 F -2.851078681255 -3.771880304708 8.036795230276  
 F -5.053816585204 -5.311647898078 7.792766771751  
 F -7.410573600421 -4.213098684436 6.960358950788  
 F -7.537706359098 -1.552834256108 6.360734583092  
 F -5.338851750434 -0.005826867014 6.578434361293  
 N 1.586936132256 1.502756360452 6.795693979253  
 N 0.162187400249 2.434925156842 8.947644998699  
 N -1.630182242708 0.698467135184 8.793013259204  
 N -0.597547919276 -0.410015662990 6.448320521635  
 Mn -0.094997240405 1.043558975075 7.637517542361  
 O 1.027324278600 -0.209411382475 8.499956520903  
 O 0.168333108779 -1.053904410158 9.619605198846  
 O -1.062544688861 2.204456330885 6.548472839180  
 H -1.619515841397 1.632740960471 5.995692085295  
 C 0.781503554225 -1.100135879812 10.95518228116  
 O 0.965553742492 0.151108755446 11.492548663390  
 C 2.368016960421 0.522568001368 11.484332667550  
 C 3.095358073736 -0.585704440554 10.719648594465  
 C 2.142030642984 -1.778185312855 10.875884946720  
 H 0.015342314239 -1.650155736452 11.525930557283  
 H -0.634097641442 -0.419598359561 9.563595791739  
 H 2.460161446744 1.510689801857 11.015148472059  
 H 2.694180982993 0.591832438954 12.535325689620  
 H 3.178699850606 -0.318364622255 9.658907643566  
 H 4.096122140917 -0.784044692824 11.128310647648  
 H 2.192649701824 -2.509276623507 10.058553274182

H 2.314440093431 -2.306626709164 11.826351874192

<sup>3</sup>PC

C 1.616461765269 -0.017915811587 5.126192217365  
C 0.402001094237 -0.629973968389 5.540584813672  
C -0.223331604219 -1.815231380946 4.990774121044  
H 0.161901560524 -2.410973854918 4.165659797928  
C -1.389454792307 -2.025911906572 5.686970605882  
H -2.114220744865 -2.820887975927 5.522647504372  
C -1.500025001642 -0.976004119233 6.677754001890  
C -2.562059887798 -0.745094908137 7.603910834488  
C -2.601096840038 0.353954664500 8.496715236452  
C -3.592157110082 0.767032092390 9.464813811597  
H -4.515066753253 0.237140953989 9.694178501850  
C -3.155799985138 1.953480694765 10.036532106642  
H -3.665063489551 2.539145077923 10.799660645918  
C -1.894405829101 2.266191038385 9.429212820727  
C -0.886749647397 3.289655469489 9.469508636529  
C -0.639944716852 4.550632648164 10.103170719149  
H -1.281073885771 5.038079354435 10.835406833917  
C 0.560959038072 5.028585065674 9.595286143900  
H 1.043492367891 5.971375712993 9.847430458829  
C 1.054673671152 4.058389808129 8.647821230803  
C 2.199078453718 4.055889970736 7.814677483343  
C 2.479487943932 3.034055411509 6.857105403166  
C 3.627225283544 2.917905014928 5.985550126839  
H 4.467414755032 3.608494436717 5.947104202796  
C 3.458590859146 1.778136642532 5.234134964708  
H 4.138997074651 1.385288759108 4.481247229720  
C 2.204637518327 1.176880545353 5.635297768514  
C 2.359556511406 -0.703404675554 4.027905959294  
C 2.977826211708 -1.946855378324 4.225071577349  
C 3.674185125221 -2.598792277877 3.205476971844  
C 3.765009165811 -2.004853010198 1.944799113957  
C 3.160711986796 -0.767050617724 1.714572769052  
C 2.469821401385 -0.135204068754 2.750292842231  
C 3.152272747088 5.192131924214 7.930739393054  
C 3.372617153224 6.081455687118 6.867001636869  
C 4.259026486370 7.154884306595 6.9691802059563  
C 4.952204624261 7.365483567847 8.163166785849  
C 4.755316003172 6.500739571076 9.241879684312  
C 3.863789541220 5.433698614724 9.116610051794  
C -3.711565151797 -1.690842067039 7.604816903769  
C -3.567936010036 -3.037600732203 7.973049126919  
C -4.644820856074 -3.925947082992 7.980101019009  
C -5.913018662289 -3.475396621936 7.608004804837  
C -6.092025719396 -2.142364664006 7.232854461440  
C -4.999667690532 -1.273003535612 7.233335653381  
F 2.919077019948 -2.539884277783 5.421323780753  
F 4.256882150205 -3.777817348330 3.428458184809  
F 4.426295619646 -2.616875610273 0.965004367858  
F 3.240871943070 -0.201749054384 0.508991685176  
F 1.895164316975 1.043453763248 2.491584148819  
F 2.710650584126 5.926010600618 5.716514619001  
F 4.437599748755 7.985848421997 5.941429167907  
F 5.798715507781 8.386532674072 8.271987315678  
F 5.423867657035 6.694315423896 10.379529103500  
F 3.715216930703 4.618656415667 10.164953742872  
F -2.372860102427 -3.507023432095 8.345464143950  
F -4.471206868023 -5.196569675424 8.345995010802  
F -6.946941616108 -4.313267179300 7.610677986741  
F -7.299613051267 -1.711254890832 6.865976797719  
F -5.209486735489 -0.011141853874 6.845955349292  
N 1.664581219944 1.966207928534 6.613128628168  
N 0.148112740218 3.033734485217 8.622423905135  
N -1.603041550414 1.286889620579 8.532902222381  
N -0.408809823561 -0.167554969017 6.543681356504  
Mn 0.059176521839 1.441137378550 7.569440081377

O 0.960326120505 0.391365260418 8.535349784155  
O 0.678357674970 -2.027491725102 9.453140513797  
O -0.847027661791 2.306528379594 6.123736936239  
H -1.699641656610 1.855569980144 6.002894902148  
C 0.370787330808 -1.868072501997 10.796734125211  
O 1.524943993404 -1.541352716924 11.588413370468  
C 2.107970251724 -2.736265860022 12.126313552161  
C 1.232163818461 -3.901185376267 11.643935297752  
C -0.103899716564 -3.198642622991 11.379356227802  
H -0.334443679743 -1.031542901389 10.948739658112  
H 0.801125707824 -1.109603393580 9.054152396125  
H 3.156275162129 -2.825940597578 11.793961491591  
H 2.108743249214 -2.659550418948 13.229136545849  
H 1.625435369237 -4.313990786173 10.702436747173  
H 1.167773129358 -4.715853504577 12.379971570524  
H -0.766708125515 -3.735305712403 10.687191490322  
H -0.644276905390 -3.019246098636 12.323064435568

<sup>5</sup>RC

C 1.364232736487 -0.211026745550 4.661628862703  
C 0.115360475591 -0.779730082072 5.027095707998  
C -0.606702974169 -1.821754020689 4.337222192998  
H -0.283885852133 -2.315490741591 3.422729691693  
C -1.768027483031 -2.053866196855 5.036295607757  
H -2.549174727106 -2.769140863381 4.785823601763  
C -1.784631018098 -1.163056632838 6.170279706690  
C -2.798954749163 -1.043682640624 7.151180369301  
C -2.755367576730 -0.084602305538 8.199165288097  
C -3.619447484052 0.144472485449 9.326224038751  
H -4.523369300581 -0.417413976346 9.556297063272  
C -3.084172395990 1.193773784449 10.070084011239  
H -3.485261581648 1.614541652204 10.990350079597  
C -1.892656058034 1.606648445981 9.404427366639  
C -0.819295280849 2.533620718214 9.573611191493  
C -0.408522646801 3.569260101675 10.466183982268  
H -0.949339967230 3.912643487466 11.346124215814  
C 0.811579916168 4.046369780727 9.994817873130  
H 1.408177316868 4.845382560666 10.432252384775  
C 1.152685787623 3.293575411958 8.815213541457  
C 2.284754721134 3.332983383475 7.956641198980  
C 2.442740689358 2.471233829597 6.844242433195  
C 3.579490602466 2.386852435677 5.963239955096  
H 4.479596871869 2.994201100778 6.037846721742  
C 3.325912854265 1.395540026471 5.043013058594  
H 3.985257469013 1.060900490712 4.244482330844  
C 2.024782765077 0.848335819372 5.338532473948  
C 2.044269966224 -0.778125918417 3.462618199704  
C 2.540754224514 -2.090805832086 3.448314125906  
C 3.174396535007 -2.635305153599 2.329606314595  
C 3.332156163885 -1.857631552914 1.180567005830  
C 2.853722349107 -0.545912080128 1.160298027236  
C 2.219051770369 -0.026491096722 2.290283897610  
C 3.364144327923 4.311435117110 8.258535185824  
C 3.658445055542 5.378805385129 7.395798148799  
C 4.663055829064 6.306756196100 7.677378491225  
C 5.404530052949 6.184916389101 8.854451958152  
C 5.138137508338 5.135340744028 9.736290663093  
C 4.131521074251 4.217969087427 9.430012546537  
C -3.961796176504 -1.968019942252 7.093671436079  
C -3.815594421883 -3.354901539406 7.258933253523  
C -4.904389483409 -4.227891027945 7.218746394018  
C -6.189149827012 -3.720023816093 7.015649977524  
C -6.372423814723 -2.345522675085 6.851295231170  
C -5.267648266151 -1.493012233307 6.891166388185  
F 2.422372137774 -2.862065580660 4.534243264294  
F 3.638589707074 -3.886379680878 2.354327529462  
F 3.936993283470 -2.365090906219 0.107932046318  
F 2.996485137065 0.196750867295 0.060570544837

F 1.761581627776 1.228400357535 2.226425454340  
F 2.959245504221 5.539363042853 6.267769949406  
F 4.910754729833 7.313270879299 6.837277198724  
F 6.363443601424 7.065313974975 9.134153634312  
F 5.852727042013 5.009608018632 10.855885069597  
F 3.922213784853 3.213666415070 10.289406801112  
F -2.605887917049 -3.880030148907 7.478801284058  
F -4.727380144465 -5.539775652108 7.386806432494  
F -7.235146102760 -4.543238437887 6.977915212987  
F -7.597563539524 -1.858106856381 6.646125503397  
F -5.483856934315 -0.186046504753 6.709312669603  
N 1.527297697943 1.520192741797 6.428624204174  
N 0.140674016139 2.409258994552 8.603780574421  
N -1.743911133104 0.823352459919 8.286363850348  
N -0.624127350654 -0.415312354578 6.123782171941  
Mn -0.192712910636 1.126756303222 7.206704981553  
O 0.870994429730 -0.146267117987 8.427548723913  
O 0.295730356880 -1.222965615144 8.845138838599  
O -1.057608877598 2.298426988694 6.074417421661  
H -2.005891501756 2.081628658771 6.084207842134  
C 0.669226412689 -0.163292092714 12.597234185375  
O 1.226690531463 1.057849310483 13.106970579138  
C 2.642051111593 1.069488412418 12.902714537630  
C 2.905651752198 0.045280459715 11.801193153957  
C 1.848204493493 -1.019206941434 12.118837615438  
H 0.079188631901 -0.653966447334 13.390266631406  
H -0.013534923491 0.077681092156 11.762917369061  
H 2.947617161872 2.092445095616 12.633441585850  
H 3.165431634658 0.787793069232 13.838544181115  
H 2.713660879106 0.490146318374 10.811879307198  
H 3.935607344966 -0.341565492107 11.812306682476  
H 1.582030065099 -1.635324427832 11.248226009043  
H 2.201847212324 -1.681220564015 12.926230093787

<sup>5</sup>TS1

C 1.406231701664 -0.167536040299 4.857037805648  
C 0.160913190830 -0.743343243828 5.233110423892  
C -0.526535849231 -1.842845020863 4.595543764201  
H -0.181882031842 -2.378466506125 3.712964692789  
C -1.687911896499 -2.069857171364 5.298334938568  
H -2.444773295880 -2.821828446485 5.082381703761  
C -1.739864657196 -1.116652034214 6.380788283292  
C -2.753678691632 -0.973226795533 7.360701925082  
C -2.727313832670 0.028511029654 8.370197517901  
C -3.652365778021 0.348060530437 9.428910703268  
H -4.576788760791 -0.184666170453 9.647035795860  
C -3.152640162016 1.453380498468 10.111677008545  
H -3.606517554862 1.956499551726 10.963785873915  
C -1.921054781043 1.806795419282 9.478612540106  
C -0.888084787867 2.789201392904 9.582945570979  
C -0.522070755272 3.898647886117 10.403872684325  
H -1.086702641240 4.287682414360 11.249454743529  
C 0.691474438760 4.377448312520 9.917341652576  
H 1.258100204216 5.221735776722 10.307212453069  
C 1.073848724208 3.554194860082 8.798135525797  
C 2.219303980100 3.571789038040 7.953914967228  
C 2.418690243292 2.650688252728 6.894559909837  
C 3.559383346667 2.553537532348 6.014765703014  
H 4.439471299436 3.193113428387 6.049488605219  
C 3.333657041993 1.506353729987 5.151665349074  
H 3.999063112455 1.151957087521 4.366642307005  
C 2.047179978691 0.936878676574 5.483476819226  
C 2.108587510010 -0.782519445199 3.694347269693  
C 2.638774573730 -2.080656751741 3.754127711986  
C 3.294870863905 -2.668732232155 2.670859678846  
C 3.442124525184 -1.950986716865 1.482169631927  
C 2.930190919213 -0.655373020915 1.387494875422  
C 2.273135027723 -0.092367929328 2.483345883166

C 3.261715280905 4.602953832696 8.203784149257  
C 3.549148109965 5.607477598413 7.265794872848  
C 4.523063758254 6.581929378014 7.492218081671  
C 5.238340254364 6.576861796600 8.691395183141  
C 4.976622375436 5.595050437196 9.649199390451  
C 4.001683070834 4.628163668331 9.396676695338  
C -3.905821176370 -1.914063801261 7.332086250938  
C -3.745531756725 -3.287195588992 7.577363385825  
C -4.821171098878 -4.177243129823 7.560652605632  
C -6.107350387938 -3.700346204577 7.300128966333  
C -6.304571527178 -2.339957495007 7.054949341582  
C -5.212227665304 -1.470606862255 7.071996584842  
F 2.532285669522 -2.795282662551 4.879638741381  
F 3.790872273735 -3.904417923747 2.766819765561  
F 4.068538139529 -2.500154866961 0.442564262222  
F 3.062365141525 0.029999834759 0.249526144094  
F 1.783713909325 1.144839185026 2.346866917909  
F 2.871599907892 5.661791714258 6.114153521257  
F 4.763967115766 7.524571324585 6.578746201952  
F 6.167554548555 7.503193711387 8.919967499152  
F 5.665809088463 5.580555837109 10.791860132788  
F 3.798930254498 3.694112606587 10.333816205829  
F -2.533812064146 -3.782008989853 7.851528016365  
F -4.630505114900 -5.475533792268 7.804830530847  
F -7.141500804012 -4.539667818949 7.284176524191  
F -7.531110556024 -1.882505538982 6.794621300363  
F -5.441883043261 -0.179178891907 6.811115328035  
N 1.540515448265 1.651482886279 6.536745518570  
N 0.085593363953 2.632571265157 8.631422187161  
N -1.704860884811 0.920044706030 8.459352881231  
N -0.608817739635 -0.335275908398 6.290283469040  
Mn -0.145481885883 1.188869170696 7.372818467417  
O 0.959004403101 0.061581450753 8.474883813602  
O 0.342045795511 -1.047308246534 9.045026621573  
O -1.069748958036 2.296620129976 6.195947545975  
H -0.863168512812 3.212635486946 6.448035133718  
C 0.597203681391 -0.739878328640 11.584399737328  
O 1.161527929052 0.502946720214 11.816251058955  
C 2.597980585358 0.378919755321 11.924600426695  
C 2.920467659093 -1.063921696009 11.531838714987  
C 1.626690818664 -1.798903158706 11.914544152274  
H -0.420010608379 -0.800314250512 11.998008352184  
H 0.398319334181 -0.864110807510 10.198475136191  
H 3.060633708249 1.136705742831 11.276644638652  
H 2.871526734064 0.594941102389 12.971732392283  
H 3.080104000927 -1.134132831492 10.445193244888  
H 3.814078312980 -1.448237077120 12.043246185494  
H 1.474162283894 -2.734363408094 11.356688616380  
H 1.610927501022 -2.039880403897 12.994371616856

<sup>5</sup>IM1

C 1.444587475228 -0.180307252472 4.903284097137  
C 0.197236322939 -0.757265131140 5.271599505681  
C -0.502046173241 -1.834256209926 4.605930642747  
H -0.160664244712 -2.353803912714 3.712515062512  
C -1.670474394094 -2.057903180908 5.296259522764  
H -2.438947821588 -2.791686609254 5.059714475624  
C -1.712100802967 -1.126458053295 6.399772551382  
C -2.731617607741 -0.981936096700 7.373808011167  
C -2.701692273383 0.011553319139 8.391151825380  
C -3.607876685941 0.305153945552 9.470590552108  
H -4.526457819005 -0.236100011575 9.692386881299  
C -3.096578061227 1.391964033535 10.176363430735  
H -3.535389112020 1.868190682749 11.051433249957  
C -1.876515135879 1.763482227072 9.536942370807  
C -0.828788671191 2.726017510164 9.669180779945  
C -0.481668777111 3.851484309181 10.480235884946  
H -1.058215849776 4.246265773172 11.315063442404

C 0.725898286149 4.340295842603 9.992088414100  
H 1.277541846129 5.200403775236 10.368711267846  
C 1.122007303713 3.505874389683 8.883218369908  
C 2.254918883524 3.545103707413 8.023082532396  
C 2.450668087125 2.633760198005 6.954629512089  
C 3.596193917192 2.532876497957 6.083888838458  
H 4.480050458466 3.166671958036 6.128443266253  
C 3.373409792690 1.487336172150 5.216671931198  
H 4.045529529793 1.130844947577 4.438319778569  
C 2.082775691954 0.922814358360 5.534794253241  
C 2.151001037508 -0.791284533625 3.741276793593  
C 2.667093909260 -2.095541836401 3.794786565940  
C 3.326498667385 -2.681639404014 2.712534572326  
C 3.491027595354 -1.956163152541 1.530822858947  
C 2.993088246738 -0.654674740473 1.442275434152  
C 2.332426316271 -0.093561660078 2.5369238322099  
C 3.286426458500 4.588514157086 8.264545527246  
C 3.557922368838 5.591636211780 7.319907548870  
C 4.518138293023 6.581193394283 7.538774090069  
C 5.236655380337 6.592621921319 8.735970856032  
C 4.99088943688 5.612690024889 9.699919413324  
C 4.029577948944 4.630275395988 9.455187100141  
C -3.891915296150 -1.910900244810 7.332376309328  
C -3.743366438644 -3.290625129089 7.547826901859  
C -4.827471963432 -4.169996694418 7.519909246679  
C -6.110826472754 -3.676033132762 7.277969821872  
C -6.296740775895 -2.309009191693 7.062634440601  
C -5.196210982685 -1.450428071979 7.090423837281  
F 2.544444718795 -2.817876422717 4.913708149234  
F 3.809237846809 -3.922977395766 2.802942980760  
F 4.120615074573 -2.503493593264 0.492179599050  
F 3.141317305543 0.038053782538 0.310763235269  
F 1.855629293792 1.149094600367 2.405356435224  
F 2.876063244014 5.631237225992 6.170308772312  
F 4.743103654334 7.522353722709 6.619732523278  
F 6.153389279253 7.533082099194 8.957069586828  
F 5.683939491122 5.613564632275 10.840357880537  
F 3.845384573318 3.696637838309 10.396396636674  
F -2.535295104902 -3.802813003784 7.805568632832  
F -4.647452839013 -5.474665469875 7.736509463245  
F -7.152874204275 -4.505228103224 7.251617947514  
F -7.520466898130 -1.834811443125 6.819604573610  
F -5.415696921429 -0.151902005244 6.857204234915  
N 1.566776749797 1.642324325151 6.582365600968  
N 0.157516935467 2.560124199808 8.737126796392  
N -1.682096746651 0.911273973749 8.478636798790  
N -0.567787860966 -0.366856086955 6.336435488273  
Mn -0.096222743641 1.159534235631 7.429374019636  
O 0.976219821272 0.004509637640 8.505077018984  
O 0.303055107810 -1.161463142387 8.995131401663  
O -0.997167418343 2.301942668257 6.264871861337  
H -1.947720249449 2.134196003437 6.380340257846  
C 0.564354406727 -0.825130156906 11.969049515343  
O 0.855608526009 0.472480462705 12.303129732567  
C 2.290051912025 0.666601360028 12.264802162506  
C 2.846705259639 -0.556693815582 11.536275422386  
C 1.820694746867 -1.644048318436 11.900244405952  
H -0.401747966906 -1.172442862716 12.350718103103  
H 0.201165624271 -0.937917649570 9.955989495337  
H 2.493391388794 1.622242104614 11.762633433319  
H 2.646517639581 0.728396942879 13.307415655907  
H 2.829943660453 -0.383071707704 10.449669116003  
H 3.873503139900 -0.797700313933 11.845198119094  
H 1.766573585132 -2.454230780636 11.157493713129  
H 2.059921347095 -2.105877596524 12.880385479170

C 0.115613340676 -0.783337998571 5.451695575584  
C -0.494728742362 -1.973909027261 4.890424029274  
H -0.111132384342 -2.548735411269 4.049213924472  
C -1.643563597703 -2.233361908103 5.603054935082  
H -2.326432517062 -3.068279913084 5.453965394285  
C -1.773984690023 -1.208702758005 6.618017049033  
C -2.816625100856 -1.056092036416 7.582938286739  
C -2.831896548161 -0.087927102545 8.639690799884  
C -3.901394833588 0.638357676440 9.227073911007  
H -4.957717468249 0.484820866878 9.011566096533  
C -3.360568712503 1.696602897800 9.978855706706  
H -3.927006028633 2.505377148970 10.438268736642  
C -1.954299930197 1.638590060841 9.884953196788  
C -0.889277873394 2.616433596920 9.943627600032  
C -0.549781506696 3.769897524906 10.724239130974  
H -1.085833772291 4.140163577477 11.596963609905  
C 0.616207438491 4.298427406766 10.176052515828  
H 1.150269561574 5.181134624184 10.526026248087  
C 0.986088787376 3.474432401974 9.048511355401  
C 2.078487124797 3.579677284244 8.125477334423  
C 2.293554873012 2.729600932293 7.000999659397  
C 3.497789119120 2.580002792324 6.203603187181  
H 4.409379642354 3.168120669484 6.303260913542  
C 3.290687564823 1.524549510484 5.342876975209  
H 4.007366980376 1.117242299432 4.630949971911  
C 1.952283488670 1.016214369746 5.598374611668  
C 2.093839574404 -0.831885534312 3.953640731994  
C 2.675385128460 -2.096830614240 4.134015070904  
C 3.399222136581 -2.735391957229 3.125162757713  
C 3.566976975534 -2.103052404461 1.891479333792  
C 3.009149691326 -0.840761640939 1.678583615108  
C 2.286118297681 -0.225751194126 2.702553224806  
C 3.107493194588 4.618349433480 8.402473804849  
C 3.369183634992 5.656067264222 7.493139837285  
C 4.331971816034 6.636872332228 7.738782673708  
C 5.068359414042 6.598781479648 8.924508161437  
C 4.838096949251 5.578751940685 9.850205394776  
C 3.871222480392 4.608445071515 9.581286320123  
C -4.053357344492 -1.857579819287 7.409398858003  
C -4.550359320772 -2.663156179515 8.450047788885  
C -5.722585735731 -3.409333238390 8.322734829045  
C -6.443495820124 -3.363896274091 7.127386299698  
C -5.985711417328 -2.569715357161 6.074112682391  
C -4.812240907586 -1.828774705774 6.225514066262  
F 2.558997055961 -2.726797977114 5.308880588287  
F 3.942535050752 -3.936733881787 3.335344313212  
F 4.257607527651 -2.701273230380 0.921773321657  
F 3.163111855299 -0.236634354576 0.497957843741  
F 1.758667502556 0.978488595571 2.455994182915  
F 2.672520311354 5.740765674831 6.354998883235  
F 4.544323277969 7.614991045544 6.855865311190  
F 5.989201398022 7.529059331820 9.170294195468  
F 5.552626155361 5.530135018705 10.976457632256  
F 3.708253399430 3.631412749929 10.481237392521  
F -3.880450337404 -2.754711855294 9.603351899116  
F -6.151308873077 -4.175261365849 9.328346865124  
F -7.562920702351 -4.072862517526 6.993582698886  
F -6.683234749406 -2.507439028873 4.937744104600  
F -4.440154221982 -1.049763061340 5.204195289760  
N 1.388397598920 1.805510183352 6.552505008186  
N 0.046378424674 2.491037133905 8.960291783671  
N -1.660725670977 0.484978626187 9.138366827037  
N -0.699833064085 -0.364754377654 6.469761412648  
Mn -0.234142357932 1.154554657138 7.5677110771469  
O 1.120497388944 0.001509538911 8.439153628177  
O 0.509349618736 -1.094199259248 9.194691712815  
O -1.605377754933 2.174571184657 6.812246460466  
H -2.037519663334 1.619760440991 6.142262689886  
C 1.312551882556 -1.416967491481 10.312336825787

<sup>5</sup>IM2

C 1.333704380180 -0.153222637728 5.043105050854



O 1.241364819086 -0.427305391038 11.314277442506  
C 2.528414287051 0.160617493507 11.562593652151  
C 3.424135069432 -0.269051342586 -10.399723243044  
C 2.800839142693 -1.608811039157 9.995132378361  
H 0.818817748278 -2.335003616403 10.675869780775  
H -0.869185890169 -0.152831721038 9.399236937386  
H 2.406728739151 1.251801026578 11.637158457532  
H 2.909928426567 -0.213424675493 12.530816187590  
H 3.335530573304 0.445583306184 9.571468138725  
H 4.480157683857 -0.352069567145 10.696351439109  
H 2.950629825950 -1.869935012298 8.939272266501  
H 3.191837799456 -2.428306771965 10.619391536991

**5TS3**

C 1.422659875980 -0.222159192562 5.042608045599  
C 0.177546600182 -0.804326205652 5.426639533242  
C -0.491299018362 -1.936616878952 4.821109558160  
H -0.132275923039 -2.501373186895 3.962609301626  
C -1.658516632255 -2.153486864321 5.517943025820  
H -2.397821377866 -2.928982763331 5.324861863529  
C -1.735881217128 -1.162494637411 6.567868837872  
C -2.776419407167 -0.998553851548 7.523898689260  
C -2.770922806863 -0.034871731850 8.575958394745  
C -3.831777981731 0.525556327244 9.361988478537  
H -4.874496038652 0.210486329465 9.350841750335  
C -3.303445118364 1.600787675213 10.080649357516  
H -3.856707777355 2.285488263313 10.722274623369  
C -1.922862238112 1.691175479127 9.743667432004  
C -0.886414790142 2.683897948562 9.816563287386  
C -0.556821022701 3.841257348670 10.592603547291  
H -1.121151189352 4.233962247097 11.437127239140  
C 0.632914954568 4.348351399159 10.077394590770  
H 1.174147887924 5.220956679336 10.440718662120  
C 1.032830686015 3.503006482100 8.977788913500  
C 2.165396951253 3.548511480894 8.108989153567  
C 2.400348013546 2.624821454000 7.053936936355  
C 3.559435657214 2.528281806915 6.194302176032  
H 4.437647875347 3.170767320870 6.235443774100  
C 3.351682290025 1.472564575667 5.333926518178  
H 4.036282905923 1.114918618842 4.566469205840  
C 2.058565110995 0.903178879112 5.649348679206  
C 2.133566283415 -0.850875510131 3.893199936015  
C 2.658865522436 -2.150791961214 3.965145511754  
C 3.326001894342 -2.747413268124 2.893344116991  
C 3.492310108452 -2.036868872765 1.702931834929  
C 2.987466950546 -0.739503799061 1.595760639200  
C 2.318052750858 -0.168669713446 2.679926661390  
C 3.172529263948 4.620745184460 8.334351651665  
C 3.428140975292 5.607732727144 7.368326214121  
C 4.370547412653 6.618760492176 7.565786634941  
C 5.088730564252 6.668635213164 8.762107807803  
C 4.858791097645 5.706135246367 9.747151023554  
C 3.913967375836 4.702780797530 9.524014758532  
C -3.994004803872 -1.847633867635 7.365019233961  
C -3.995455623565 -3.200598819238 7.732713697821  
C -5.126129729062 -4.008328579002 7.594250828479  
C -6.304120339503 -3.460606948140 7.082139164423  
C -6.338495121240 -2.115889449092 6.707633696530  
C -5.191419578973 -1.331764204081 6.849772562306  
F 2.538706274953 -2.859818820067 5.093403822040  
F 3.816359357826 -3.984597162976 3.002756681271  
F 4.129867003223 -2.594211282864 0.674048525362  
F 3.136519646677 -0.060413289391 0.455741618320  
F 1.834319606985 1.069437409562 2.528504870179  
F 2.746608905913 5.611726093818 6.217699226861  
F 4.579397821897 7.543571357134 6.626287751516  
F 5.989260474376 7.629389142148 8.962655653260  
F 5.551122125045 5.743578324837 10.887654115968

F 3.746162996395 3.788314232668 10.487178225066  
F -2.886799394659 -3.756559102812 8.233599106003  
F -5.091961620013 -5.293196139447 7.954601697184  
F -7.390925727054 -4.219397234950 6.948706588539  
F -7.461629339800 -1.592589611404 6.211089529196  
F -5.259014961480 -0.051359590702 6.468545744704  
N 1.528202643282 1.630302085840 6.676276983468  
N 0.080280277473 2.539044385376 8.859937210507  
N -1.610593255913 0.623693278040 8.917778062316  
N -0.612612744207 -0.368617700428 6.454539522810  
Mn -0.191877795489 1.174131288632 7.536633264964  
O 1.116446657962 -0.070222863838 8.586565631700  
O 0.284841904433 -1.067478574015 9.580899861994  
O -1.463968902077 2.245206569999 6.553219542806  
H -1.848764247231 1.663864451036 5.877597796232  
C 0.834104680652 -1.175695602264 10.933066142019  
O 1.069764430275 0.053722165997 11.512540997421  
C 2.488827910859 0.348529281398 11.532754490977  
C 3.162660409031 -0.768509517932 10.734540015843  
C 2.161789113400 -1.918653022209 10.893606562596  
H 0.025212647998 -1.694937662930 11.472716548455  
H -0.544324489804 -0.447028028664 9.526768446884  
H 2.643891042165 1.347124330903 11.102978289294  
H 2.809929993108 0.361454074216 12.588193751377  
H 3.226186660552 -0.484811338536 9.676532254597  
H 4.164302904904 -1.011725852309 11.116457373504  
H 2.197366377268 -2.672225620541 10.095822205904  
H 2.293874357737 -2.429150265298 11.860817299343

**5PC**

C 1.626032645115 -0.054257667774 5.195996328918  
C 0.393709355270 -0.647611034795 5.600937242207  
C -0.253311292951 -1.807045932860 5.027803340450  
H 0.122109425876 -2.399276633682 4.195883430410  
C -1.432279992494 -1.992329760050 5.710671693898  
H -2.179215733987 -2.762399152103 5.528894425752  
C -1.518661145969 -0.951700324188 6.710698280961  
C -2.595015572493 -0.710931195235 7.62678533274  
C -2.652609968818 0.389723834859 8.512730924335  
C -3.654457842030 0.814612167946 9.466420063869  
H -4.579229747090 0.288674449264 9.696764521787  
C -3.220184561451 2.008424981686 10.021958625687  
H -3.733755094089 2.608008675032 10.771124672968  
C -1.951872832616 2.308580839494 9.416273089376  
C -0.936942833094 3.342665665372 9.451150017861  
C -0.701586670447 4.617848038768 10.077968138276  
H -1.351530135157 5.112049899116 10.797594851413  
C 0.499815845954 5.089998987549 9.575628637393  
H 0.980785237419 6.035536806325 9.820084460714  
C 1.000315386584 4.098538668531 8.643265457147  
C 2.144805659059 4.071891703372 7.816913468328  
C 2.442651095463 3.022901990100 6.880382794079  
C 3.617703196794 2.894039931953 6.047454502932  
H 4.457420627394 3.585601100858 6.021323910475  
C 3.476701053108 1.737842800226 5.315280288290  
H 4.181194375796 1.330082688142 4.593389637360  
C 2.211621152857 1.147607501225 5.691930024560  
C 2.382040822713 -0.768023640530 4.126340695880  
C 2.952344744752 -2.029392557300 4.354029322014  
C 3.664527871346 -2.708515243230 3.363958219274  
C 3.816877746095 -2.126544154096 2.103465185144  
C 3.258829349020 -0.872830664094 1.843601276354  
C 2.553365431321 -0.211137364840 2.850327156827  
C 3.102156882435 5.206986145567 7.913699388396  
C 3.335590091557 6.066295520660 6.828415063539  
C 4.223400567815 7.139847709173 6.912069594931  
C 4.906489732519 7.377866335038 8.106983965602  
C 4.697344971146 6.541640052489 9.205732732565

C 3.802506796049 5.475198706157 9.100316934644  
C -3.746115656375 -1.654836488418 7.610994459463  
C -3.606192597179 -3.001713626014 7.979628497267  
C -4.683871363533 -3.888699868770 7.973210453682  
C -5.946286279471 -3.436500617593 7.582939298214  
C -6.119772874678 -2.103541298478 7.204596457043  
C -5.027938055499 -1.233751507305 7.222494817200  
F 2.834491077678 -2.609372980016 5.551433766695  
F 4.203045277959 -3.901953760167 3.614819859291  
F 4.492531991336 -2.765172962255 1.152063149935  
F 3.397286216605 -0.320276075559 0.638254243896  
F 2.022355879492 0.980772204295 2.564214979884  
F 2.683986032301 5.881007252081 5.677021174724  
F 4.414158159726 7.943725258944 5.865889149368  
F 5.754730555558 8.398404083882 8.197549609936  
F 5.356058724146 6.761894819172 10.343591201707  
F 3.641194846015 4.687632540752 10.166987263655  
F -2.415718088418 -3.470349571229 8.366232639385  
F -4.516631850084 -5.158761402995 8.341210205306  
F -6.980039791190 -4.273180304308 7.571248532240  
F -7.321141904458 -1.672285123243 6.820527060203  
F -5.230392686862 0.027743758925 6.832604224243  
N 1.636422568832 1.951456268746 6.636276627085  
N 0.093262626892 3.079793102817 8.623711563247  
N -1.653570798028 1.322371261839 8.541812686685  
N -0.403375531406 -0.172734521753 6.606052842698  
Mn 0.028436096770 1.444032034646 7.595325888292  
O 0.944624500722 0.560955385947 8.747888907267  
O 0.777685766114 -1.886018399008 9.394124956419  
O -0.929273668864 2.402174570499 6.185857699454  
H -1.862074549180 2.145957269782 6.270387744591  
C 0.543906942153 -1.848546772426 10.754545902799  
O 1.755380184584 -1.667098343543 11.519767930233  
C 2.279765704878 -2.938125544507 11.920973478658  
C 1.317209643268 -3.998530055109 11.368435331325  
C 0.016591023035 -3.199043987907 11.241773926865  
H -0.097260866853 -0.990025896469 11.025529044617  
H 0.869216197244 -0.912300561388 9.071459121156  
H 3.309096530848 -3.059297922457 11.541270269332  
H 2.323116320189 -2.970090671157 13.025766685414  
H 1.643298329359 -4.330869392581 10.370894692329  
H 1.237653981324 -4.880993137839 12.020251717329  
H -0.711051409370 -3.629972701480 10.540800589950  
H -0.464553606347 -3.079879992480 12.226598333030

**RC**

C 1.176326444400 -0.479980869703 5.531887840701  
C -0.160509578748 -0.870203624035 5.794327349683  
C -0.840789496580 -2.035950923143 5.284072328530  
H -0.420519493036 -2.771152725460 4.599973552322  
C -2.107902966471 -2.038140871054 5.817370541691  
H -2.892526189731 -2.765243480264 5.640863298424  
C -2.221142048898 -0.866980317880 6.662407349242  
C -3.351170747962 -0.496820835163 7.439088491117  
C -3.389476395266 0.659133497378 8.261046187022  
C -4.361259872659 1.125911291467 9.215918407021  
H -5.321484798054 0.659365413807 9.432452577275  
C -3.832915735588 2.260329264534 9.827036758625  
H -4.296944248404 2.852580851753 10.614562045781  
C -2.546395462159 2.482319709033 9.245277822083  
C -1.413323392786 3.340801372477 9.415831902581  
C -1.013275901827 4.461578566549 10.209929389861  
H -1.620978894960 4.979121697649 10.951015861511  
C 0.301699515026 4.753475877122 9.859482590186  
H 0.922292025723 5.548002308069 10.271910706604  
C 0.701178308764 3.798243418906 8.856719650423  
C 1.930983335632 3.587214177520 8.183650297564

C 2.149367840729 2.521985362589 7.271028264839  
C 3.399951360041 2.187300804575 6.636052026320  
H 4.335228132130 2.732188944018 6.753796006163  
C 3.198146838840 1.045515353238 5.895725163332  
H 3.939073893836 0.506619891960 5.307751629270  
C 1.818057230183 0.665102934365 6.067924879288  
C 1.993633992130 -1.371222306142 4.658483819022  
C 2.395270156375 -2.647094013309 5.081381187403  
C 3.165780221226 -3.490618846305 4.278968486148  
C 3.560107607162 -3.061480606972 3.009895989571  
C 3.181857911871 -1.795734794648 2.557490024940  
C 2.409041490908 -0.972721371305 3.379418869773  
C 3.066924722285 4.502293441075 8.484062283036  
C 3.577261991189 5.386229134566 7.521259187952  
C 4.637337298436 6.252999742137 7.794365674135  
C 5.216559469917 6.254590568889 9.064985130944  
C 4.735047669393 5.386649057121 10.047230770398  
C 3.674871299777 4.528580958844 9.748304784648  
C -4.548424864914 -1.381034967736 7.424597009944  
C -4.513586250931 -2.689746489685 7.931404547487  
C -5.636983760067 -3.518866889251 7.930488216751  
C -6.846515766354 -3.041603925046 7.421591100393  
C -6.919670141723 -1.742350337148 6.915535414786  
C -5.781436238096 -0.933749103929 6.924383192608  
F 2.050424246127 -3.088764273655 6.297776950759  
F 3.533979539713 -4.696346937595 4.717474114614  
F 4.295600149415 -3.856424563385 2.234232879411  
F 3.553644486527 -1.385851585005 1.342770642159  
F 2.059693796335 0.228900503516 2.907628572470  
F 3.040720427717 5.423596788376 6.296893443572  
F 5.092366307638 7.085238277131 6.855388732019  
F 6.226987683711 7.078465249883 9.337998140740  
F 5.294655098134 5.377870256982 11.258851524421  
F 3.256032826438 3.698525690078 10.712088873139  
F -3.382099589307 -3.178485993747 8.450515908108  
F -5.566519609118 -4.756485758752 8.425572458014  
F -7.925440901306 -3.822799623035 7.417944943703  
F -8.072095127912 -1.285629413297 6.420495159059  
F -5.890343059876 0.298226535552 6.415364866154  
N 1.205147567534 1.577962966782 6.896649942027  
N -0.362506548419 2.978500559762 8.617013732257  
N -2.326641932534 1.513688192150 8.300134197041  
N -1.022021218252 -0.176004959382 6.612496272454  
Mn -0.689799650154 1.608809456116 7.305447016385  
O 0.041846919918 -0.010815426440 9.508777631921  
O -0.592468798167 -0.992877916370 9.819583578157  
O -1.301119773491 2.613673944915 5.939835879538  
H -2.272755677460 2.574541458517 5.972175778075  
C 2.908830077951 -2.241658377487 10.953720182793  
O 3.206119086830 -1.043612944336 11.684365164684  
C 4.069942974839 -0.200325744517 10.915264136489  
C 3.979027929720 -0.713909083703 9.479663760045  
C 3.799551252849 -2.219141677084 9.707438138887  
H 3.096327838907 -3.115525979707 11.600138919181  
H 1.837254923373 -2.243440589164 10.682160837395  
H 3.737795359149 0.844300452013 11.027318803770  
H 5.107173666557 -0.273269685389 11.298254214709  
H 3.092231445130 -0.293453086509 8.979077433317  
H 4.863922311795 -0.462105460252 8.876979329086  
H 3.345895530501 -2.737746957816 8.850189434246  
H 4.772443421106 -2.692109132470 9.919878758785

**TS1**

C 0.207481783289 -0.424473444962 4.192980605675  
C -0.997073702177 -0.813631787046 4.838214508817  
C -1.887376489683 -1.882596009734 4.446696698915  
H -1.755283178246 -2.538876333210 3.588227853610  
C -2.911273836313 -1.922497673061 5.364174850836

H -3.747813681062 -2.619242750270 5.377492522572  
C -2.671334570735 -0.880547933540 6.334762620122  
C -3.475361156290 -0.573585654370 7.463513696179  
C -3.149117913017 0.435083262251 8.415955763383  
C -3.836915633904 0.929098357642 9.581265419862  
H -4.790506845506 0.568054342660 9.964588778894  
C -3.059703749379 1.953160897445 10.122916776565  
H -3.288135456664 2.545046971082 11.008293124520  
C -1.906424965712 2.083989628439 9.289058851721  
C -0.730867204890 2.904918571046 9.171534261583  
C -0.072795737782 3.978481753940 9.851683484224  
H -0.407390091000 4.468182563178 10.765154989115  
C 1.076842229697 4.276448636991 9.120245480004  
H 1.807776765606 5.050036614680 9.352786939852  
C 1.122013515248 3.377751205606 7.992838585584  
C 2.041957421892 3.235941030262 6.912551508723  
C 1.901547740840 2.288535889124 5.860120461877  
C 2.814756165487 2.078691434474 4.756104230660  
H 3.735393456336 2.632690888127 4.579954515257  
C 2.309140182168 1.055821760544 3.988100312913  
H 2.741553969074 0.646958908963 3.076399870609  
C 1.080825376759 0.617288780434 4.618107974445  
N 0.874873881347 1.380347279637 5.725349894724  
N 0.018800720476 2.587606719468 8.075145968308  
N -2.000907186878 1.151203376744 8.291234020954  
N -1.496206678079 -0.240032486136 5.981124233953  
Mn -0.660143133549 1.213134116205 6.925204555975  
O 0.515274389877 0.074914614784 7.953510796007  
O 0.911514523130 -1.063087655116 7.348362870530  
C 3.291548188012 -1.489830712315 8.267781252278  
O 3.321297356297 -2.675684063668 8.963384081867  
C 3.169446008877 -2.383835589403 10.369520426544  
C 3.862403296410 -1.034830523005 10.544417761099  
C 3.534996259765 -0.324102335884 9.215570625476  
H 3.831221876761 -1.569698443608 7.313184783094  
H 1.973764312981 -1.292387658097 7.774848765057  
H 2.092700876742 -2.331506154969 10.609715944908  
H 3.622228028413 -3.214471352872 10.926261439141  
H 3.505159609726 -0.488237736903 11.428114306322  
H 4.949067739190 -1.182527896546 10.643577123268  
H 2.625417746604 0.294311269749 9.304763521390  
H 4.340993452080 0.336698247572 8.863979041853  
C 0.599896697461 -1.179920109416 2.969300610209  
C 1.730044284885 -2.012421475090 2.949249294038  
C -0.137787498461 -1.097146598305 1.778250036900  
C 2.112465138750 -2.724417522045 1.810564796263  
C 0.219873891250 -1.802721614310 0.627615343953  
C 1.352139945272 -2.619528697297 0.644109530273  
C -4.736845945927 -1.336893937461 7.664480355824  
C -4.925125044933 -2.162458810263 8.784516262964  
C -5.808790608187 -1.251699586144 6.761514609507  
C -6.109395833883 -2.870159518777 8.998913146748  
C -7.001281860683 -1.952684809666 6.951386996293  
C -7.152715466629 -2.764794408762 8.077020103029  
C 3.220408390001 4.145493972625 6.886883562957  
C 4.213471472857 4.090282845795 7.877526767066  
C 3.388903409119 5.114704382410 5.885079464445  
C 5.318015279154 4.944251428831 7.876413532430  
C 4.486224377707 5.977708169223 5.859000827824  
C 5.454429208115 5.893456889260 6.861552869573  
F 6.504220188659 6.713717561926 6.848800184639  
F 6.247127380682 4.853122404324 8.830694131754  
F 4.133997852465 3.181602571708 8.857836662197  
F 4.608062172524 6.890680744795 4.892630562630  
F 2.473954588542 5.245193179931 4.918080529353  
F -5.716082646643 -0.466417626258 5.682647230986  
F -8.000929558473 -1.840625066681 6.073513050114  
F -8.286849818170 -3.436880013053 8.269966478528  
F -6.246491315935 -3.653932508206 10.071038587685

F -3.943866052553 -2.308702440122 9.681774079970  
F 2.477335716648 -2.155333809029 4.050367385305  
F 3.190729646964 -3.511937952600 1.832151833270  
F 1.705419148526 -3.296172583445 -0.448274991120  
F -0.504470438807 -1.693373229626 -0.488872409878  
F -1.220721502825 -0.313940631114 1.715206837582  
O -1.535899248999 2.473002333783 5.945289712763  
H -1.267063658240 3.345592720519 6.278484258417

IM1

C 0.207481783289 -0.424473444962 4.192980605675  
C -0.997073702177 -0.813631787046 4.838214508817  
C -1.887376489683 -1.882596009734 4.446696698915  
H -1.755283178246 -2.538876333210 3.588227853610  
C -2.911273836313 -1.922497673061 5.364174850836  
H -3.747813681062 -2.619242750270 5.377492522572  
C -2.671334570735 -0.880547933540 6.334762620122  
C -3.475361156290 -0.573585654370 7.463513696179  
C -3.149117913017 0.435083262251 8.415955763383  
C -3.836915633904 0.929098357642 9.581265419862  
H -4.790506845506 0.568054342660 9.964588778894  
C -3.059703749379 1.953160897445 10.122916776565  
H -3.288135456664 2.545046971082 11.008293124520  
C -1.906424965712 2.083989628439 9.289058851721  
C -0.730867204890 2.904918571046 9.171534261583  
C -0.072795737782 3.978481753940 9.851683484224  
H -0.407390091000 4.468182563178 10.765154989115  
C 1.076842229697 4.276448636991 9.120245480004  
H 1.807776765606 5.050036614680 9.352786939852  
C 1.122013515248 3.377751205606 7.992838585584  
C 2.041957421892 3.235941030262 6.912551508723  
C 1.901547740840 2.288535889124 5.860120461877  
C 2.814756165487 2.078691434474 4.756104230660  
H 3.735393456336 2.632690888127 4.579954515257  
C 2.309140182168 1.055821760544 3.988100312913  
H 2.741553969074 0.646958908963 3.076399870609  
C 1.080825376759 0.617288780434 4.618107974445  
N 0.874873881347 1.380347279637 5.725349894724  
N 0.018800720476 2.587606719468 8.075145968308  
N -2.000907186878 1.151203376744 8.291234020954  
N -1.496206678079 -0.240032486136 5.981124233953  
Mn -0.660143133549 1.213134116205 6.925204555975  
O 0.515274389877 0.074914614784 7.953510796007  
O 0.911514523130 -1.063087655116 7.348362870530  
C 3.291548188012 -1.489830712315 8.267781252278  
O 3.321297356297 -2.675684063668 8.963384081867  
C 3.169446008877 -2.383835589403 10.369520426544  
C 3.862403296410 -1.034830523005 10.544417761099  
C 3.534996259765 -0.324102335884 9.215570625476  
H 3.831221876761 -1.569698443608 7.313184783094  
H 1.973764312981 -1.292387658097 7.774848765057  
H 2.092700876742 -2.331506154969 10.609715944908  
H 3.622228028413 -3.214471352872 10.926261439141  
H 3.505159609726 -0.488237736903 11.428114306322  
H 4.949067739190 -1.182527896546 10.643577123268  
H 2.625417746604 0.294311269749 9.304763521390  
H 4.340993452080 0.336698247572 8.863979041853  
C 0.599896697461 -1.179920109416 2.969300610209  
C 1.730044284885 -2.012421475090 2.949249294038  
C -0.137787498461 -1.097146598305 1.778250036900  
C 2.112465138750 -2.724417522045 1.810564796263  
C 0.219873891250 -1.802721614310 0.627615343953  
C 1.352139945272 -2.619528697297 0.644109530273  
C -4.736845945927 -1.336893937461 7.664480355824  
C -4.925125044933 -2.162458810263 8.784516262964  
C -5.808790608187 -1.251699586144 6.761514609507  
C -6.109395833883 -2.870159518777 8.998913146748  
C -7.001281860683 -1.952684809666 6.951386996293  
C -7.152715466629 -2.764794408762 8.077020103029  
C 3.220408390001 4.145493972625 6.886883562957  
C 4.213471472857 4.090282845795 7.877526767066  
C 3.388903409119 5.114704382410 5.885079464445  
C 5.318015279154 4.944251428831 7.876413532430  
C 4.486224377707 5.977708169223 5.859000827824  
C 5.454429208115 5.893456889260 6.861552869573  
F 6.504220188659 6.713717561926 6.848800184639  
F 6.247127380682 4.853122404324 8.830694131754  
F 4.133997852465 3.181602571708 8.857836662197  
F 4.608062172524 6.890680744795 4.892630562630  
F 2.473954588542 5.245193179931 4.918080529353  
F -5.716082646643 -0.466417626258 5.682647230986  
F -8.000929558473 -1.840625066681 6.073513050114  
F -8.286849818170 -3.436880013053 8.269966478528  
F -6.246491315935 -3.653932508206 10.071038587685

C -7.152715466629 -2.764794408762 8.077020103029  
C 3.220408390001 4.145493972625 6.886883562957  
C 4.213471472857 4.090282845795 7.877526767066  
C 3.388903409119 5.114704382410 5.885079464405  
C 5.318015279154 4.944251428831 7.876413532430  
C 4.486224377707 5.977708169223 5.859000827824  
C 5.454429208115 5.893456889260 6.861552869573  
F 6.504220188659 6.713717561926 6.848800184639  
F 6.247127380682 4.853122404324 8.830694131754  
F 4.133997852465 3.181602571708 8.857836662197  
F 4.608062172524 6.890680744795 4.892630562630  
F 2.473954588542 5.245193179931 4.918080529353  
F -5.716082646643 -0.466417626258 5.682647230986  
F -8.000929558473 -1.840625066681 6.073513050114  
F -8.286849818170 -3.436880013053 8.269966478528  
F -6.246491315935 -3.653932508206 10.071038587685  
F -3.943866052553 -2.308702440122 9.681774079970  
F 2.477335716648 -2.155333809029 4.050367385305  
F 3.190729646964 -3.511937952600 1.832151833270  
F 1.705419148526 -3.296172583445 -0.448274991120  
F -0.504470438807 -1.693373229626 -0.488872409878  
F -1.220721502825 -0.313940631114 1.715206837582  
O -1.535899248999 2.473002333783 5.945289712763  
H -1.267063658240 3.345592720519 6.278484258417

**<sup>1</sup>IM2**

C 1.503297347329 -0.380557973233 5.642346031846  
C 0.260803894534 -0.893236268055 6.089795814283  
C -0.374904321143 -2.135356998336 5.686329032791  
H 0.031905625729 -2.859986035251 4.982882931856  
C -1.577165427444 -2.210477545140 6.340544153588  
H -2.310420437164 -3.012363827218 6.273247769266  
C -1.708519059340 -1.013260203944 7.150330327497  
C -2.838583335160 -0.631150398520 7.918787728707  
C -2.885972421210 0.544614696775 8.726172093688  
C -3.933605211069 1.361916682885 9.176427207923  
H -4.994826449573 1.178596266794 9.013253854091  
C -3.379845659873 2.531855594477 9.759988548133  
H -3.947400074702 3.400855266994 10.090161932024  
C -1.988308754394 2.455303341026 9.681386653136  
C -0.900626872382 3.395390255946 9.654419568248  
C -0.639188827238 4.710020777441 10.178881377271  
H -1.260532456003 5.260851575888 10.883885716997  
C 0.558386173266 5.130735165884 9.617498815406  
H 1.060013158070 6.081512568417 9.793083039426  
C 1.015814018554 4.068059240755 8.746430838280  
C 2.129488046896 3.963859254791 7.866180565836  
C 2.356931300165 2.850889200981 7.015397821205  
C 3.520567820011 2.624620618218 6.184099547322  
H 4.374062623250 3.294127805873 6.092086440219  
C 3.357407459409 1.405341584221 5.572979728935  
H 4.052690615917 0.919009444823 4.890745858348  
C 2.082861027753 0.872059203263 6.009171277619  
C 2.284716795603 -1.236819243925 4.703408445508  
C 2.856319910553 -2.447964154575 5.122704818810  
C 3.591733117574 -3.263461107520 4.260308818491  
C 3.779163187692 -2.870409857674 2.933568916301  
C 3.226957304858 -1.669929249754 2.482127585068  
C 2.491570800176 -0.875215044410 3.363841326525  
C 3.102422884894 5.089858704384 7.833240973232  
C 3.301900509936 5.863329408858 6.678445363547  
C 4.200466985730 6.931318520409 6.643960927156  
C 4.928750949000 7.257908103487 7.789681984687  
C 4.753952663092 6.511742889372 8.956830332534  
C 3.851164864131 5.446771158586 8.965917567055  
C -4.089812382240 -1.422922708305 7.811016133897  
C -4.686413553385 -1.996035547758 8.947629497030  
C -5.875937178192 -2.722599008473 8.880298155401

C -6.511908784538 -2.892169744081 7.648454194343  
C -5.952100868328 -2.332302066860 6.498329074768  
C -4.763613837008 -1.605482931005 6.591271352123  
F 2.713068932937 -2.854306939468 6.390414780912  
F 4.124432177220 -4.407341101323 4.696245245948  
F 4.480846478078 -3.638600459080 2.101276801713  
F 3.397589541956 -1.296202394449 1.211889983357  
F 1.967393153220 0.260539602865 2.889777204821  
F 2.607382088038 5.600635608152 5.566360095711  
F 4.357586934431 7.649146929977 5.529700026949  
F 5.787346336322 8.275933254167 7.768864122325  
F 5.456324002446 6.814269098986 10.050723633198  
F 3.728634036385 4.746236243573 10.098527161290  
F -4.100099818773 -1.873310211133 10.142991196468  
F -6.402904893288 -3.264822990859 9.980336613591  
F -7.646971774185 -3.584821019609 7.571262977061  
F -6.566699611649 -2.477552941541 5.322286961039  
F -4.286482839998 -1.055425598572 5.469615063094  
N 1.513879137827 1.765176579141 6.870968666826  
N 0.115393961213 3.060785850332 8.816766338065  
N -1.681794948879 1.174803646775 9.114697681435  
N -0.561091943497 -0.261438773781 6.986365118042  
Mn -0.110895198264 1.411306797058 7.813313957614  
O 0.962922264682 0.661225648334 9.140965638232  
O 0.316277741576 -0.364110354858 9.991743273071  
O -1.180396192995 2.364487571115 6.677236088100  
H -1.992590842472 1.848904418792 6.521687529153  
C 0.846673923354 -1.649148967849 9.629089005041  
O 0.079487004116 -2.587708746825 10.328451297677  
C 0.776796688790 -3.022763837318 11.516331418261  
C 2.036203701072 -2.157880673509 11.604901389655  
C 2.277691572194 -1.805352229017 10.132895455253  
H 0.715066700520 -1.788230666854 8.546685196603  
H -1.086770306191 0.532719378926 9.693428160452  
H 0.105850969454 -2.913720173107 12.382222184401  
H 1.020703359001 -4.092844852601 11.397533119790  
H 1.831564659307 -1.241965196052 12.179636808567  
H 2.877059989674 -2.684794809454 12.077644336403  
H 2.859432319952 -0.888286796771 9.971934563804  
H 2.765423762689 -2.634900660674 9.595313405663

**<sup>1</sup>TS3**

C 1.497885455913 -0.408170009822 5.660880630715  
C 0.252658300419 -0.921306470382 6.100710288728  
C -0.382938922688 -2.160728864838 5.688856015116  
H 0.027609810117 -2.884712964251 4.986952944900  
C -1.590938331155 -2.234300483801 6.332711413421  
H -2.325726282449 -3.034039574794 6.257085931317  
C -1.726339057162 -1.038394182679 7.143733008936  
C -2.863558567262 -0.653497388116 7.900310064157  
C -2.916557266421 0.521631361469 8.708185587280  
C -3.967023952585 1.340739264314 9.148627670038  
H -5.026945372429 1.159538094833 8.975022701570  
C -3.416819031042 2.509283420029 9.738230755324  
H -3.985929916632 3.379109461491 10.063488172620  
C -2.024712461018 2.430227816327 9.673037545998  
C -0.934768643718 3.367982350223 9.657191918316  
C -0.674187660712 4.680646271264 10.186921871505  
H -1.300489254784 5.231960853351 10.887132538879  
C 0.530099115739 5.098632135188 9.637968515555  
H 1.033078442164 6.047394198673 9.820444949129  
C 0.992578595134 4.036313785793 8.769183321691  
C 2.114398068288 3.930330076931 7.899532765853  
C 2.346956880264 2.818227463873 7.049049265271  
C 3.516784513429 2.591526807280 6.226588616489  
H 4.372512563369 3.259315634373 6.143306949689  
C 3.355670030398 1.374498636139 5.610605571245  
H 4.055342464985 0.888419824705 4.932696233122

C 2.076725188346 0.842566114794 6.035597649924 H -4.795515078449 1.292060404826 9.821829384833  
C 2.279661716456 -1.256579007792 4.714987972866 C -3.347738339401 2.969959741548 9.841565080783  
C 2.846116733047 -2.475343321812 5.118753292526 H -3.850188885204 3.735561130711 10.430376315648  
C 3.581749184780 -3.281298364195 4.247572807005 C -2.044015413380 3.072625281477 9.2366005095057  
C 3.773881585268 -2.871375356695 2.926700676415 C -0.964766897770 4.008496203644 9.140322870689  
C 3.226560192388 -1.663181349591 2.490169151913 C -0.668227927418 5.358707164967 9.490488881345  
C 2.491076875130 -0.878312087656 3.380498005137 H -1.320206025891 6.040264479217 10.034556707070  
C 3.090501858150 5.053886744980 7.877689394050 C 0.603254441247 5.640730406829 8.990563185327  
C 3.302556361446 5.829137661146 6.726344870071 H 1.133479051122 6.589050268160 9.064489018326  
C 4.204058103560 6.894937642373 6.702299319204 C 1.085259023443 4.456507586540 8.334698307610  
C 4.922594743239 7.217370475885 7.855328734961 C 2.269608740353 4.184381799697 7.598087792134  
C 4.735142030437 6.469353341209 9.019325845728 C 2.494810467968 2.961997224753 6.920836795075  
C 3.829673912455 5.406618262661 9.017930670877 C 3.649023218162 2.603320873154 6.136055898477  
C -4.116649473371 -1.440106298805 7.776495257169 H 4.530943468272 3.224738192488 5.992093640450  
C -4.729727064430 -2.011834357039 8.904971991613 C 3.433283983231 1.347480325319 5.619503928413  
C -5.921820222912 -2.732590615483 8.822223460822 H 4.113379593495 0.776282723539 4.990596404499  
C -6.543735071038 -2.897274494111 7.582577761962 C 2.139208702778 0.901240808775 6.076688761702  
C -5.967432241952 -2.338437204787 6.440115772137 C 2.240488179008 -1.255817723854 4.853511937304  
C -4.776654759090 -1.617523666758 6.548450940837 C 2.740069107447 -2.492281379590 5.290414840205  
F 2.697492567674 -2.899896967344 6.379959121369 C 3.413339995041 -3.367380699296 4.435509436129  
F 4.109331876231 -4.432644944558 4.669745247451 C 3.604754341170 -3.014178569839 3.098316862557  
F 4.475369953051 -3.630515153888 2.086028827367 C 3.120367840682 -1.791568798645 2.628781951717  
F 3.401257836758 -1.273018641296 1.225463815599 C 2.446771486913 -0.936028562057 3.502630498260  
F 1.971188112992 0.264828415686 2.919667300995 C 3.297156069946 5.256364951974 7.506064297851  
F 2.617594788218 5.570465032464 5.607409778862 C 3.614813550715 5.880548171824 6.289408548025  
F 4.373182988699 7.614634198036 5.591013784186 C 4.566651689699 6.898292349880 6.202079369611  
F 5.783836375084 8.233303464100 7.844483123822 C 5.226224553211 7.327029598511 7.355762233530  
F 5.428151530697 6.767932125234 10.120244629133 C 4.930553233808 6.7324922662717 8.584195383669  
F 3.694868546030 4.704152097186 10.147945354253 C 3.977487932934 5.714137559661 8.645591213074  
F -4.157487404369 -1.893363318079 10.107558047236 C -4.002161942333 -1.112727317906 8.249544672309  
F -6.464559070029 -3.273840784267 9.915034803979 C -3.947941246378 -2.351740167030 8.907874302192  
F -7.681097458835 -3.584285357049 7.490695906282 C -5.069172418156 -3.170878837287 9.051869727726  
F -6.568551984605 -2.478924553586 5.256566929252 C -6.297556875222 -2.755963364228 8.533862483700  
F -4.283571607494 -1.067860022834 5.433533957179 C -6.389896442774 -1.529811569018 7.872394181597  
N 1.502913532137 1.734519772457 6.895313397104 C -5.252993222347 -0.730823997784 7.737165325510  
N 0.088072063103 3.031968444011 8.828399370212 F 2.588160108886 -2.862806937154 6.565950037207  
N -1.715152016653 1.149483462482 9.108596110653 F 3.881183731191 -4.532418331041 4.888677519139  
N -0.574778591161 -0.289970921976 6.992514912164 F 4.246888871410 -3.839920574037 2.273828425424  
Mn -0.131204566213 1.383124234423 7.822391342381 F 3.294056441623 -1.454960897898 1.348931981612  
O 0.929672107031 0.632139025676 9.159596275144 F 1.983931980007 0.218054361655 3.010321717179  
O 0.276398872240 -0.391481429197 10.004221602425 F 2.988705663199 5.516895852811 5.165320995737  
O -1.187144882580 2.335549023640 6.673891607348 F 4.839051521819 7.472330525143 5.028639776365  
H -1.998485848248 1.820881311872 6.510825786848 F 6.134102746399 8.298581758211 7.284561850398  
C 0.806432663931 -1.682980360922 9.662966627529 F 5.565377244253 7.134227757314 9.687068988770  
O 0.142414833829 -2.595933191995 10.482151215879 F 3.734160532816 5.159639695316 9.837580788823  
C 0.802307049995 -2.592836156154 11.760229525531 F -2.796194245501 -2.781528930167 9.436020620203  
C 2.293077929219 -2.347805586100 11.458745359338 F -4.977147352376 -4.338174608217 9.691762895189  
C 2.293744838695 -1.776088702910 10.021484579362 F -7.375064306260 -3.526878502337 8.667700159121  
H 0.567912025816 -1.904198056955 8.613093137829 F -7.558809531653 -1.135761520606 7.363371660147  
H -1.126171238343 0.506742859758 9.692571180069 F -5.382295895013 0.422768290697 7.073266621488  
H 0.380909283037 -1.794184485218 12.393506440538 N 1.615665260086 1.891080574361 6.882501530132  
H 0.59649997442 -3.562683839699 12.234125308590 N 0.121426299057 3.502734630334 8.466362638283  
H 2.736614258906 -1.653866247830 12.186815977037 N -1.796993296060 1.907430682028 8.592063900994  
H 2.862171941627 -3.287469900927 11.506571594929 N -0.533766783078 -0.055916864145 7.102039454778  
H 2.758146103900 -0.785182472549 9.937496222274 Mn -0.012095031577 1.723539461475 7.841736741102  
H 2.800496070121 -2.452274727591 9.317660467769 O 0.447335661053 0.946677772504 9.133201401692  
O -0.007139997698 -1.039119018056 11.006231355110  
O -0.861797180692 2.318209441588 6.283616335160  
H -1.772769822730 1.982113629103 6.252781256877  
C 1.110400199111 -1.876178038453 10.913766002510  
O 1.137575348733 -2.604306477739 9.687205628321  
C 0.564372833532 -3.910587562247 9.866972350524  
C 0.095623259421 -3.973577240247 11.324995895847  
C 1.018414098205 -2.949202447294 11.995411589957  
H 2.044071643461 -1.286554440096 10.937799972937  
H 0.101805745023 -0.328486814407 10.334822377610  
H -0.256545502634 -4.055113259922 9.147000597786  
H 1.344152489543 -4.664511103148 9.655735577577  
H -0.949989538637 -3.640670904578 11.403500317126

**1PC**

C 1.513536864342 -0.334457526090 5.774374845602  
C 0.241424207965 -0.767663896859 6.243099960903  
C -0.470808888793 -1.977444301786 5.887078790392  
H -0.1197171806786 -2.747929297459 5.203344275360  
C -1.671547120063 -1.948222791553 6.555794957042  
H -2.467672312270 -2.688778990334 6.502204105275  
C -1.712134447929 -0.722113005803 7.326453597462  
C -2.803884369009 -0.241949467891 8.105884312280  
C -2.834055722049 1.040274204415 8.718577169257  
C -3.836391596051 1.710781282369 9.520597090065

H 0.173489074548 -4.983835103777 11.752075278430  
H 0.631373683813 -2.547429079576 12.941986679966  
H 2.016995761443 -3.378737850081 12.174355764437
